# Supplementary material for: Human and preclinical studies of the host–gut microbiome co-metabolite hippurate as a marker and mediator of metabolic health
Source: PubMed Central journal article supplement (PMC8515120; doi:10.1136/gutjnl-2020-323314), 2021-05-11
Supplement: gutjnl-2020-323314supp001.pdf [file gutjnl-2020-323314supp001.pdf]

**Supplementary Data 1**

MC0001 phenylalanine degradation (cinnamate production)  
cpd [phenylalanine] [cinnamate, NH3]  
K10775  
ref MetaCyc Pathway: benzoate biosynthesis I (CoA-dependent, fl-oxidative)  
///  
MC0002 chlorogenate degradation  
cpd [chlorogenate] [caffeate, quinate]  
K06889 K09252  
ref MetaCyc Pathway: chlorogenic acid degradation PMID: 11412317  
///  
MC0003 caffeate respiration  
cpd [caffeate] [hydrocaffeate]  
bactNOG04579  
ref PMID: 23315745  
///  
MC0004 cinnamate conversion  
cpd [cinnamate] [phenylpropanoate]  
K10797  
ref KEGG Pathway: phenylalanine metabolism  
///  
MC0005 coumarate degradation  
cpd [coumarate] [hydroxybenzoate]  
cpd [ferulate] [vanillate]  
cpd [caffeate] [protocatechuate]  
cpd [cinnamate] [benzoate]  
K01904 bactNOG05057  
K18383 K01692 K01715 K01782 K01825 K13767  
K15016 bactNOG19280  
K21802 K00141  
ref MetaCyc Pathway: 4-coumarate degradation (anaerobic) PMID: 22328668  
///  
MC0006 (hydroxy)benzoate degradation  
cpd [(hydroxy)benzoate] [3-hydroxypimeloyl-CoA]  
K04105, K04107, K04108, K04109 K20458, K04107, K04108, K04109 K04110  
bactNOG00950  
K04112, K04113, K04114, K04115 K19515, K19516  
K07537  
K07538  
K07539  
ref MetaCyc Pathway: 4-coumarate degradation (anaerobic) MetaCyc  
Pathway: benzoyl-CoA degradation II (anaerobic) Kegg module: M00541  
///  
MC0007 ferulate degradation  
cpd [ferulate] [vanillin]  
K12508  
K18383  
ref MetaCyc Pathway: ferulate degradation  
///  
MC0008 vanillin conversion  
cpd [vanillin, (O2)] [protocatechuate]  
K21802 bactNOG00059  
K03862, K03863 K15066  
ref MetaCyc Pathway: superpathway of vanillin and vanillate  
degradation Kegg Pathway: aminobenzoate degradation

```
///
MC0009      cinnamate degradation
cpd  [cinnamate] [benzoyl-CoA]
bactNOG08521
actNOG07134
COG0277
bactNOG05297
ref  MetaCyc Pathway: trans-cinnamoyl-CoA biosynthesis  MetaCyc
Pathway: benzoyl-CoA biosynthesis
///
MC0010      quinate degradation
cpd  [quininate] [protocatechuate]
cpd  [shikimate] [protocatechuate]
K05887      K05358      COG0169
K03785      K03786      K13832
K09483      K15652
ref  MetaCyc Pathway: quinate degradation I  MetaCyc Pathway: quinate
degradation II  PMID: 12620848
///
MC0011      4-hydroxybenzoate conversion
cpd  [4-hydroxybenzoate, O2]      [protocatechuate]
K00481
ref  Kegg Pathway: benzoate degradation PMID: 12620848  PMID: 14556848
///
MC0012      catechin degradation
cpd  [catechin] [protocatechuate, phloroglucinol carboxylic acid]
bactNOG14887
ref  PMID: 12608578
///
MC0013      3-hydroxybenzoate conversion
cpd  [3-hydroxybenzoate, O2]      [protocatechuate]
K19065
ref  Kegg Pathway: benzoate degradation
///
MC0014      benzoate conversion
cpd  [benzoate, O2]      [4-hydroxybenzoate]
K07824
ref  Kegg Pathway: benzoate degradation
///
MC0015      benzoate degradation (aerobic)
cpd  [benzoate, O2]      [catechol, CO2]
K05549,K05550,K05784
K05783
ref  Kegg module: M00551  MetaCyc Pathway: benzoate degradation I
(aerobic)
///
MC0016      benzoate degradation (anaerobic)
cpd  [benzoyl-CoA]      [3-hydroxypimeloyl-CoA]
K04112,K04113,K04114,K04115  K19515,K19516
K19066
K07534
K07535
K07536
K04118
ref  MetaCyc Pathway: benzoyl-CoA degradation III (anaerobic) Kegg
module: M00540
///
MC0017      phenylalanine degradation
```

```
cpd [phenylalanine, 2-oxoglutarate] [CO2, glutamate, benzoyl-CoA]
K00832      K00812      K00813      K11358      K00817
K04103
K00146      K00129
K01912
K18361
K18355,K18356,K18357,K18358,K18359
ref  MetaCyc Pathway: phenylacetate degradation II (anaerobic)MetaCyc
Pathway: L-phenylalanine degradation II (anaerobic)
///
MC0018      cellulose and hemicellulose degradation (cellulolosome)
cpd [cellulose, hemicellulose] [ferulate, polysaccharide,
oligosaccharide]
K01181      K13465
K09252
bactNOG05428
ref  MetaCyc Pathway: cellulose and hemicellulose degradation
(cellulolosome)
///
MC0019      feruloyl esterase (cellulolosome)
cpd [cellulose, hemicellulose] [ferulate]
K09252
ref  MetaCyc Pathway: cellulose and hemicellulose degradation
(cellulolosome) MC0018
///
MC0020      hippurate hydrolase
cpd [hippurate] [glycine, benzoate]
K01451
ref  PMID: 18665452
///
```
