# Supplementary material for: Human and preclinical studies of the host–gut microbiome co-metabolite hippurate as a marker and mediator of metabolic health
Source: PubMed Central journal article supplement (PMC8515120; doi:10.1136/gutjnl-2020-323314), 2021-05-11
Supplement: gutjnl-2020-323314supp005.pdf [file gutjnl-2020-323314supp005.pdf]

**Supplementary Table ST.1. Modelling of urinary hippurate in function of kidney filtration rate and serum glycine levels.** Least-squares multivariate linear regression of urinary hippurate levels using glycine serum levels and glomerular filtration rate as explanatory variables (N=269). All variables rank-transformed. The full model summary statistics are reported labelled with the prefix "Model", followed by the parameters estimates statistics for each explanatory variable.

| Y         | Model | Model   | Model  | Model   | Model   | Model    | Model | Model          | Model    | Model     | Model   | Model    |
|-----------|-------|---------|--------|---------|---------|----------|-------|----------------|----------|-----------|---------|----------|
|           | Mod   | Sum of  | Mean   | Model   | Model F | Model P- | N     | Term           | Estimate | Std Error | t Ratio | Term P-  |
|           | el    | Squares | Square | R2      | ratio   | value    |       |                |          |           |         | value    |
| Hippurate | 3     | 20414.1 | 6804.7 | 0.01237 | 1.1065  | 0.3469   | 269   | Intercept      | 145.17   | 14.251101 | 10.19   | 8.83E-21 |
| Hippurate | 3     | 20414.1 | 6804.7 | 0.01237 | 1.1065  | 0.3469   | 269   | serum Glycine  | 0.02767  | 0.061965  | 0.45    | 0.6556   |
| Hippurate | 3     | 20414.1 | 6804.7 | 0.01237 | 1.1065  | 0.3469   | 269   | eGFR           | -0.09913 | 0.061867  | -1.6    | 0.1103   |
| Hippurate | 3     | 20414.1 | 6804.7 | 0.01237 | 1.1065  | 0.3469   | 269   | eGFR * serum G | -0.00016 | 0.000794  | -0.2    | 0.8387   |
