# Supplementary material for: Human and preclinical studies of the host–gut microbiome co-metabolite hippurate as a marker and mediator of metabolic health
Source: HighWire-hosted journal article supplement (doi:10.1136/gutjnl-2020-323314), 2021-05-11
Supplement: gutjnl-2020-323314supp007_data_supplement.pdf [file gutjnl-2020-323314supp007_data_supplement.pdf]

Supplementary Table ST.2. Annotated of 1H NMR peaks reported in in Suppl.Fig.3

| Number | Chemical shift (ppm)                       | Metabolite                               |
|--------|--------------------------------------------|------------------------------------------|
| 1      | 0.000 (s)                                  | TSP                                      |
| 2      | 1.041 (d)                                  | L-valine                                 |
| 3      | 1.172 (d), 1.236 (d), 5.213 (d)            | fucose                                   |
| 4      | 1.194 (d)                                  | methylmalonate                           |
| 5      | 1.201 (d)                                  | 3-aminoisobutyrate                       |
| 6      | 1.274 (s)                                  | 3-hydroxyisovalerate                     |
| 7      | 1.33 (d), 4.114 (q)                        | lactate                                  |
| 8      | 1.369 (s)                                  | 2-hydroxyisobutyrate                     |
| 9      | 1.453 (m), 1.727 (m), 1.912 (m)            | lysine                                   |
| 10     | 1.485 (d)                                  | alanine                                  |
| 11     | 1.921 (s)                                  | acetate                                  |
| 12     | 2.344 (s), 7.287 (t), 7.380 (t)            | phenylacetate                            |
| 13     | 2.407 (s)                                  | succinate                                |
| 14     | 2.407 (t), 3.004 (t)                       | 2-oxoglutarate                           |
| 15     | 2.442 (m)                                  | L-glutamine                              |
| 16     | 2.538 (d), 2.689 (d)                       | citrate                                  |
| 17     | 2.729 (s)                                  | dimethylamine                            |
| 18     | 2.889 (s)                                  | TMA                                      |
| 19     | 2.903 (s)                                  | dimethylglycine                          |
| 20     | 3.028 (s)                                  | creatine phosphate                       |
| 21     | 3.052 (s), 4.062 (s)                       | creatinine                               |
| 22     | 3.233 (s)                                  | carnitine                                |
| 23     | 3.277 (s)                                  | TMAO                                     |
| 24     | 3.277 (t)                                  | taurine                                  |
| 25     | 3.54 (dd), 4.659 (d), 5.248 (d)            | glucose                                  |
| 26     | 3.576 (s)                                  | glycine                                  |
| 27     | 3.67 (d)                                   | L-isoleucine                             |
| 28     | 3.936 (s)                                  | glycolate                                |
| 29     | 3.959 (s)                                  | creatine                                 |
| 30     | 3.977 (d), 7.556 (t), 7.632 (t), 7.834 (d) | hippurate                                |
| 31     | 4.445 (s), 8.077 (m), 8.845 (m), 9.127 (s) | trigonelline                             |
| 32     | 4.486 (s), 8.901 (d), 8.969 (d), 9.279 (s) | 1-methylnicotinamide                     |
| 33     | 5.398 (s)                                  | allantoin                                |
| 34     | 5.774 (s broad)                            | urea                                     |
| 35     | 5.774 (s)                                  | cis-aconitate                            |
| 36     | 6.527 (s)                                  | fumarate                                 |
| 37     | 6.595 (s)                                  | trans-aconitate                          |
| 38     | 6.66 (d)                                   | N-methyl-2-pyridone-5-carboxamide (2-PY) |
| 39     | 6.925 (d)                                  | 3-hydroxymandelate                       |
| 40     | 7.380 (d), 7.419 (t)                       | N-phenylacetyl glycine                   |
| 41     | 7.505 (d), 7.696 (d)                       | 3-indoxylsulfate                         |
| 42     | 7.753 (d)                                  | 4-hydroxybenzoate OR 4-hydroxyhippurate  |
| 43     | 8.191 (s), 8.213 (s)                       | adenine                                  |
| 44     | 8.465 (s)                                  | formate                                  |
