# Supplementary material for: Human and preclinical studies of the host–gut microbiome co-metabolite hippurate as a marker and mediator of metabolic health
Source: HighWire-hosted journal article supplement (doi:10.1136/gutjnl-2020-323314), 2021-05-11
Supplement: gutjnl-2020-323314supp009_data_supplement.pdf [file gutjnl-2020-323314supp009_data_supplement.pdf]

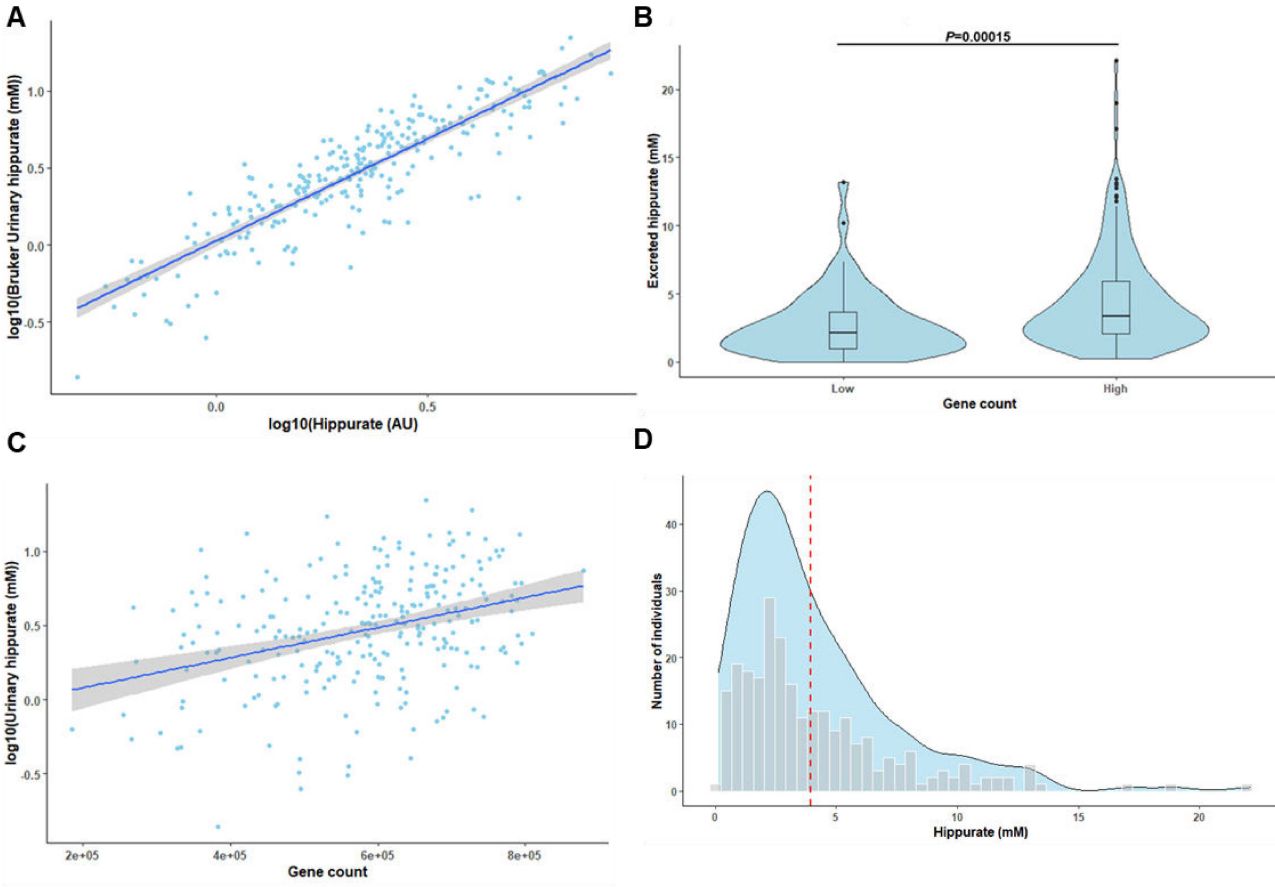

Supplemental Figure 5
