# Supplementary material for: Human and preclinical studies of the host–gut microbiome co-metabolite hippurate as a marker and mediator of metabolic health
Source: PubMed Central journal article supplement (PMC8515120; doi:10.1136/gutjnl-2020-323314), 2021-05-11

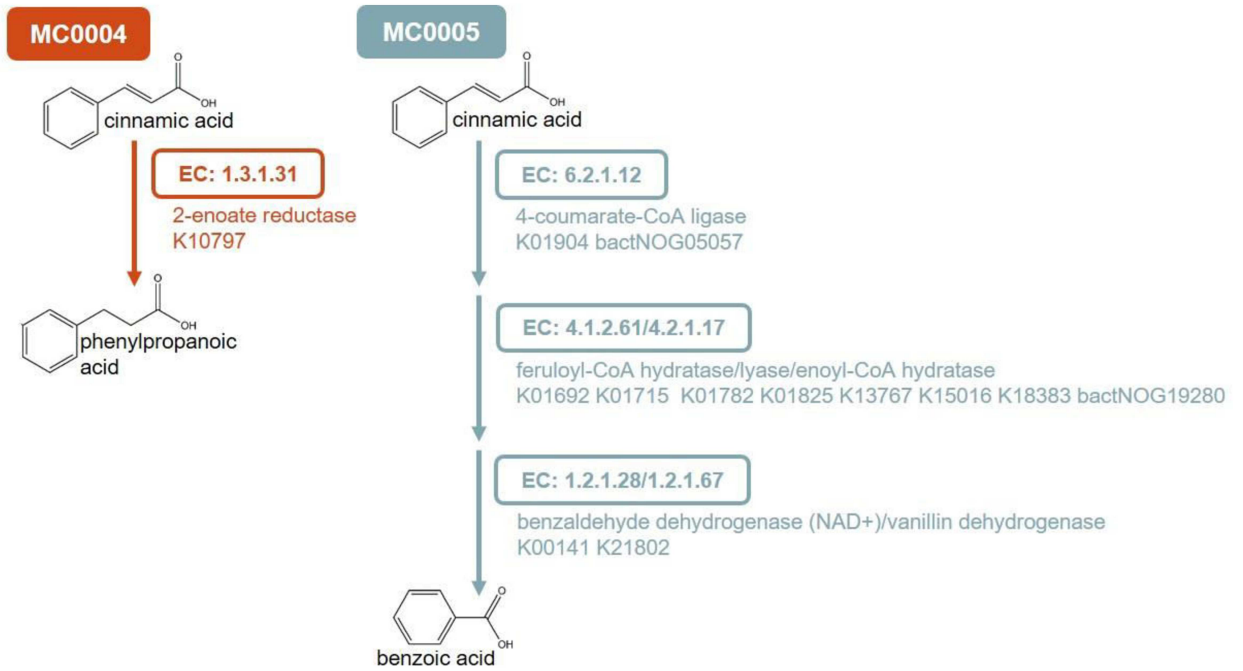

Supplement: gutjnl-2020-323314supp012.pdf [file gutjnl-2020-323314supp012.pdf]
