# Supplementary material for: Human and preclinical studies of the host–gut microbiome co-metabolite hippurate as a marker and mediator of metabolic health
Source: HighWire-hosted journal article supplement (doi:10.1136/gutjnl-2020-323314), 2021-05-11
Supplement: gutjnl-2020-323314supp013_data_supplement.pdf [file gutjnl-2020-323314supp013_data_supplement.pdf]

**Supplementary Table ST.4. Association between gut microbiota functional potentials mapped to gut-specific metabolic modules (GMMs) describing microbial phenylpropanoid metabolism and urine hippurate levels.**

| GMM    | Spearman $\rho$ | P      | FDR    | Detected in N samples |
|--------|-----------------|--------|--------|-----------------------|
| MC0005 | 0.2113          | 0.0005 | 0.0060 | 201                   |
| MC0014 | 0.1985          | 0.0010 | 0.0060 | 34                    |
| MC0004 | 0.1916          | 0.0015 | 0.0060 | 271                   |
| MC0002 | -0.1150         | 0.0587 | 0.1594 | 271                   |
| MC0018 | 0.1117          | 0.0664 | 0.1594 | 270                   |
| MC0017 | -0.0862         | 0.1570 | 0.3140 | 145                   |
| MC0020 | 0.0511          | 0.4020 | 0.6891 | 271                   |
| MC0019 | 0.0385          | 0.5276 | 0.7914 | 270                   |
| MC0011 | 0.0278          | 0.6491 | 0.8655 | 25                    |
| MC0015 | -0.0212         | 0.7280 | 0.8736 | 10                    |
| MC0003 | 0.0093          | 0.8792 | 0.8792 | 57                    |
| MC0010 | 0.0101          | 0.8684 | 0.8792 | 271                   |
