# Supplementary material for: Human and preclinical studies of the host–gut microbiome co-metabolite hippurate as a marker and mediator of metabolic health
Source: PubMed Central journal article supplement (PMC8515120; doi:10.1136/gutjnl-2020-323314), 2021-05-11
Supplement: gutjnl-2020-323314supp014.pdf [file gutjnl-2020-323314supp014.pdf]

**Supplementary Table ST.5. Association between abundance of gut-specific metabolic modules (GMMs) describing microbial phenylpropanoid metabolism and microbial gene richness.**

| Variable | by Variable | Spearman $\rho$ | P        | FDR      |
|----------|-------------|-----------------|----------|----------|
| Richness | MC0002      | 0.069605        | 2.53E-01 | 3.38E-01 |
| Richness | MC0003      | 0.085162        | 1.62E-01 | 2.78E-01 |
| Richness | MC0004      | 0.631656        | 1.39E-31 | 8.35E-31 |
| Richness | MC0005      | 0.338217        | 1.12E-08 | 4.49E-08 |
| Richness | MC0010      | 0.048013        | 4.31E-01 | 5.17E-01 |
| Richness | MC0011      | 0.018112        | 7.67E-01 | 7.67E-01 |
| Richness | MC0014      | 0.232558        | 1.12E-04 | 2.68E-04 |
| Richness | MC0015      | -0.0306         | 6.16E-01 | 6.72E-01 |
| Richness | MC0017      | 0.072978        | 2.31E-01 | 3.38E-01 |
| Richness | MC0018      | 0.134976        | 2.63E-02 | 5.26E-02 |
| Richness | MC0019      | 0.325816        | 4.03E-08 | 1.21E-07 |
| Richness | MC0020      | 0.640955        | 9.45E-33 | 1.13E-31 |
