# Supplementary material for: Human and preclinical studies of the host–gut microbiome co-metabolite hippurate as a marker and mediator of metabolic health
Source: PubMed Central journal article supplement (PMC8515120; doi:10.1136/gutjnl-2020-323314), 2021-05-11
Supplement: gutjnl-2020-323314supp015.pdf [file gutjnl-2020-323314supp015.pdf]

**Supplementary Table ST.6. Phenylpropanoid metabolism potential in metagenomic species, assessed by mapping to GMMs significantly associated to urine hippurate levels.**

| Metagenomic species (MGS) |          |        |        | MGS taxonomy                                             |                                  |                |              |
|---------------------------|----------|--------|--------|----------------------------------------------------------|----------------------------------|----------------|--------------|
| MGS                       | MGS size | MC0004 | MC0005 | species                                                  | genus                            | phylum         | superkingdom |
| CAG00013                  | 5283     | 1      | 0.333  | unclassified Clostridiales                               | unclassified Clostridiales       | Firmicutes     | Bacteria     |
| CAG00014                  | 5115     | 1      | 0.333  | Lachnospiraceae bacterium x4                             | unclassified Lachnospiraceae     | Firmicutes     | Bacteria     |
| CAG00015                  | 5054     | 1      | 0      | Hungatella hathewayi 2                                   | Hungatella                       | Firmicutes     | Bacteria     |
| CAG00610                  | 1706     | 1      | 0      | Hungatella hathewayi 2                                   | Hungatella                       | Firmicutes     | Bacteria     |
| CAG00025                  | 4407     | 1      | 0      | Hungatella hathewayi 1                                   | Hungatella                       | Firmicutes     | Bacteria     |
| CAG00029                  | 4210     | 1      | 0.333  | unclassified Lachnospiraceae                             | Lachnospiraceae                  | Firmicutes     | Bacteria     |
| CAG00760                  | 4085     | 1      | 0      | Ruminococcus sp. CAG:177                                 | Ruminococcus                     | Firmicutes     | Bacteria     |
| CAG00164                  | 3943     | 1      | 0      | Blautia wexlerae                                         | Blautia                          | Firmicutes     | Bacteria     |
| CAG00036                  | 3712     | 1      | 0.333  | Clostridium innocuum                                     | Erysipelatoclostridium           | Firmicutes     | Bacteria     |
| CAG00039                  | 3693     | 1      | 0      | unclassified Firmicutes                                  | unclassified Firmicutes          | Firmicutes     | Bacteria     |
| CAG00041                  | 3638     | 1      | 0      | unclassified Firmicutes                                  | unclassified Firmicutes          | Firmicutes     | Bacteria     |
| CAG00042                  | 3599     | 1      | 0.333  | unclassified Faecalibacterium                            | Faecalibacterium                 | Firmicutes     | Bacteria     |
| CAG00044                  | 3582     | 1      | 0.333  | Clostridium symbiosum                                    | Lachnospiraceae                  | Firmicutes     | Bacteria     |
| CAG00047                  | 3568     | 1      | 0      | unclassified Lachnospiraceae                             | Lachnospiraceae                  | Firmicutes     | Bacteria     |
| CAG00051                  | 3531     | 1      | 0.333  | Clostridium clostridioforme                              | Lachnospiraceae                  | Firmicutes     | Bacteria     |
| CAG00055                  | 3490     | 1      | 0.333  | Roseburia sp. CAG:182                                    | Roseburia                        | Firmicutes     | Bacteria     |
| CAG00061                  | 3388     | 1      | 0.333  | unclassified                                             | unclassified                     | unclassified   | unclassified |
| CAG00103                  | 3249     | 1      | 0      | unclassified Lachnospiraceae                             | unclassified Lachnospiraceae     | Firmicutes     | Bacteria     |
| CAG00766                  | 3209     | 1      | 0.333  | Firmicutes bacterium CAG:176                             | unclassified Firmicutes          | Firmicutes     | Bacteria     |
| CAG00848                  | 1429     | 1      | 0.333  | unclassified Firmicutes                                  | unclassified Firmicutes          | Firmicutes     | Bacteria     |
| CAG00070                  | 3146     | 1      | 0      | Blautia hydrogenotrophica                                | Blautia                          | Firmicutes     | Bacteria     |
| CAG00077                  | 3096     | 1      | 0.333  | Erysipelotrichaceae bacterium 3_1_53                     | unclassified Erysipelotrichaceae | Firmicutes     | Bacteria     |
| CAG00079                  | 3078     | 1      | 0.333  | Clostridium sp. CAG:7                                    | unclassified Clostridiales       | Firmicutes     | Bacteria     |
| CAG00082                  | 3037     | 1      | 0      | Erysipelatoclostridium ramosum                           | Erysipelatoclostridium           | Firmicutes     | Bacteria     |
| CAG00084                  | 2999     | 1      | 0      | unclassified                                             | unclassified                     | unclassified   | unclassified |
| CAG00099                  | 2880     | 1      | 0.333  | unclassified Firmicutes                                  | unclassified Firmicutes          | Firmicutes     | Bacteria     |
| CAG00101                  | 2879     | 1      | 0      | Ruminococcus sp. CAG:17                                  | Blautia                          | Firmicutes     | Bacteria     |
| CAG00110                  | 2805     | 1      | 0      | uncultured Clostridium sp.                               | unclassified Clostridiales       | Firmicutes     | Bacteria     |
| CAG00113                  | 2790     | 1      | 0      | Clostridium scindens                                     | Lachnospiraceae                  | Firmicutes     | Bacteria     |
| CAG00125                  | 2735     | 1      | 0      | unclassified                                             | unclassified                     | unclassified   | unclassified |
| CAG00128                  | 2722     | 1      | 0      | unclassified Blautia                                     | Blautia                          | Firmicutes     | Bacteria     |
| CAG00129                  | 2713     | 1      | 0      | unclassified Desulfovibrionales                          | unclassified Desulfovibrionales  | Proteobacteria | Bacteria     |
| CAG00243                  | 2625     | 1      | 0      | Ruminococcus torques 1                                   | Blautia                          | Firmicutes     | Bacteria     |
| CAG00200                  | 2615     | 1      | 0.333  | unclassified Flavonifractor                              | Flavonifractor                   | Firmicutes     | Bacteria     |
| CAG00183                  | 2480     | 1      | 0      | Ruminococcus sp. CAG:60                                  | Ruminococcus                     | Firmicutes     | Bacteria     |
| CAG00193                  | 2443     | 1      | 0.333  | unclassified Firmicutes                                  | unclassified Firmicutes          | Firmicutes     | Bacteria     |
| CAG00197                  | 2433     | 1      | 0      | Bifidobacterium gallinarum = saeculare = Bifidobacterium | Bifidobacterium                  | Actinobacteria | Bacteria     |
| CAG00204                  | 2415     | 1      | 0      | unclassified Firmicutes                                  | unclassified Firmicutes          | Firmicutes     | Bacteria     |
| CAG00215                  | 2381     | 1      | 0.333  | unclassified Clostridiales                               | unclassified Clostridiales       | Firmicutes     | Bacteria     |
| CAG00304                  | 2284     | 1      | 0      | unclassified Firmicutes                                  | unclassified Firmicutes          | Firmicutes     | Bacteria     |
| CAG00241                  | 2282     | 1      | 0      | Anaerotruncus sp. CAG:390                                | Anaerotruncus                    | Firmicutes     | Bacteria     |
| CAG00255                  | 2253     | 1      | 0      | unclassified Blautia                                     | Blautia                          | Firmicutes     | Bacteria     |
| CAG00259                  | 2248     | 1      | 0      | unclassified Firmicutes                                  | unclassified Firmicutes          | Firmicutes     | Bacteria     |
| CAG00264                  | 2230     | 1      | 0      | unclassified Lachnospiraceae                             | unclassified Lachnospiraceae     | Firmicutes     | Bacteria     |
| CAG00277                  | 2204     | 1      | 0      | unclassified Ruminococcaceae                             | unclassified Ruminococcaceae     | Firmicutes     | Bacteria     |
| CAG00292                  | 2177     | 1      | 0.333  | unclassified                                             | unclassified                     | unclassified   | unclassified |
| CAG00294                  | 2176     | 1      | 0.333  | unclassified Firmicutes                                  | unclassified Firmicutes          | Firmicutes     | Bacteria     |
| CAG00305                  | 2165     | 1      | 0.333  | unclassified Clostridiales                               | unclassified Clostridiales       | Firmicutes     | Bacteria     |

|            |      |   |       |                               |                              |                |              |
|------------|------|---|-------|-------------------------------|------------------------------|----------------|--------------|
| CAG00523   | 2163 | 1 | 0     | Eubacterium sp. CAG:180       | Eubacterium                  | Firmicutes     | Bacteria     |
| CAG00308   | 2153 | 1 | 0     | unclassified Firmicutes       | unclassified Firmicutes      | Firmicutes     | Bacteria     |
| CAG00318   | 2129 | 1 | 0.333 | Clostridium sp. CAG:510       | unclassified Clostridiales   | Firmicutes     | Bacteria     |
| CAG00348   | 2086 | 1 | 0     | unclassified                  | unclassified                 | unclassified   | unclassified |
| CAG00350   | 2079 | 1 | 0     | unclassified                  | unclassified                 | unclassified   | unclassified |
| CAG00351   | 2078 | 1 | 0.333 | unclassified Faecalibacterium | Faecalibacterium             | Firmicutes     | Bacteria     |
| CAG00356   | 2066 | 1 | 0     | unclassified                  | unclassified                 | unclassified   | unclassified |
| CAG00373   | 2047 | 1 | 0     | unclassified Clostridiales    | unclassified Clostridiales   | Firmicutes     | Bacteria     |
| CAG00032_1 | 2037 | 1 | 0.333 | unclassified Firmicutes       | unclassified Firmicutes      | Firmicutes     | Bacteria     |
| CAG00381   | 2033 | 1 | 0     | Clostridium sp. CAG:242       | unclassified Clostridiales   | Firmicutes     | Bacteria     |
| CAG00388   | 2024 | 1 | 0.333 | unclassified                  | unclassified                 | unclassified   | unclassified |
| CAG00391   | 2019 | 1 | 0.333 | unclassified Firmicutes       | unclassified Firmicutes      | Firmicutes     | Bacteria     |
| CAG00492   | 2012 | 1 | 0     | unclassified Ruminococcaceae  | unclassified Ruminococcaceae | Firmicutes     | Bacteria     |
| CAG00394   | 2007 | 1 | 0     | unclassified                  | unclassified                 | unclassified   | unclassified |
| CAG00396   | 2006 | 1 | 0     | unclassified Firmicutes       | unclassified Firmicutes      | Firmicutes     | Bacteria     |
| CAG00402   | 2001 | 1 | 0.333 | unclassified Firmicutes       | unclassified Firmicutes      | Firmicutes     | Bacteria     |
| CAG00418   | 1981 | 1 | 0     | unclassified Anaerotruncus    | Anaerotruncus                | Firmicutes     | Bacteria     |
| CAG00732   | 1980 | 1 | 0.333 | unclassified Eubacterium      | Eubacterium                  | Firmicutes     | Bacteria     |
| CAG00431   | 1969 | 1 | 0     | unclassified                  | unclassified                 | unclassified   | unclassified |
| CAG00443   | 1947 | 1 | 0     | unclassified Eubacterium      | Eubacterium                  | Firmicutes     | Bacteria     |
| CAG00447   | 1945 | 1 | 0     | Clostridium sp. CAG:413       | unclassified Clostridiales   | Firmicutes     | Bacteria     |
| CAG00460   | 1938 | 1 | 0.333 | unclassified Clostridiales    | unclassified Clostridiales   | Firmicutes     | Bacteria     |
| CAG00488   | 1899 | 1 | 0     | Clostridium sp. CAG:1024      | unclassified Clostridiales   | Firmicutes     | Bacteria     |
| CAG00982   | 1895 | 1 | 0.333 | unclassified Eggerthellaceae  | unclassified Eggerthellaceae | Actinobacteria | Bacteria     |
| CAG00491   | 1889 | 1 | 0     | unclassified Clostridiales    | unclassified Clostridiales   | Firmicutes     | Bacteria     |
| CAG00494   | 1885 | 1 | 0     | unclassified Eggerthellaceae  | unclassified Eggerthellaceae | Actinobacteria | Bacteria     |
| CAG00497   | 1881 | 1 | 0     | unclassified Firmicutes       | unclassified Firmicutes      | Firmicutes     | Bacteria     |
| CAG00500   | 1874 | 1 | 0     | unclassified Clostridiales    | unclassified Clostridiales   | Firmicutes     | Bacteria     |
| CAG00509   | 1861 | 1 | 0     | unclassified Firmicutes       | unclassified Firmicutes      | Firmicutes     | Bacteria     |
| CAG00518   | 1839 | 1 | 0     | unclassified                  | unclassified                 | unclassified   | unclassified |
| CAG00522   | 1835 | 1 | 0     | unclassified Blautia          | Blautia                      | Firmicutes     | Bacteria     |
| CAG01700   | 1828 | 1 | 0     | unclassified Clostridiales    | unclassified Clostridiales   | Firmicutes     | Bacteria     |
| CAG00532   | 1816 | 1 | 0.333 | Clostridium sp. CAG:678       | unclassified Clostridiales   | Firmicutes     | Bacteria     |
| CAG00533   | 1815 | 1 | 0.333 | unclassified Firmicutes       | unclassified Firmicutes      | Firmicutes     | Bacteria     |
| CAG00537   | 1807 | 1 | 0     | unclassified Clostridiales    | unclassified Clostridiales   | Firmicutes     | Bacteria     |
| CAG00543   | 1799 | 1 | 0     | unclassified Firmicutes       | unclassified Firmicutes      | Firmicutes     | Bacteria     |
| CAG00550   | 1787 | 1 | 0     | unclassified Coprobacillus    | Coprobacillus                | Firmicutes     | Bacteria     |
| CAG00554   | 1783 | 1 | 0.333 | Eubacterium ramulus           | Eubacterium                  | Firmicutes     | Bacteria     |
| CAG00555   | 1782 | 1 | 0.333 | unclassified Clostridiales    | unclassified Clostridiales   | Firmicutes     | Bacteria     |
| CAG00559   | 1776 | 1 | 0     | unclassified Firmicutes       | unclassified Firmicutes      | Firmicutes     | Bacteria     |
| CAG00579   | 1740 | 1 | 0.333 | unclassified Oscillibacter    | Oscillibacter                | Firmicutes     | Bacteria     |
| CAG00581   | 1739 | 1 | 0     | Ruminococcus sp. CAG:563      | Ruminococcus                 | Firmicutes     | Bacteria     |
| CAG00586   | 1731 | 1 | 0.333 | unclassified Blautia          | Blautia                      | Firmicutes     | Bacteria     |
| CAG00598   | 1719 | 1 | 0.333 | unclassified Firmicutes       | unclassified Firmicutes      | Firmicutes     | Bacteria     |
| CAG00603   | 1715 | 1 | 0.333 | Firmicutes bacterium CAG:114  | unclassified Firmicutes      | Firmicutes     | Bacteria     |
| CAG00607   | 1710 | 1 | 0     | Eubacterium sp. CAG:251       | Eubacterium                  | Firmicutes     | Bacteria     |
| CAG00622   | 1695 | 1 | 0.333 | unclassified Firmicutes       | unclassified Firmicutes      | Firmicutes     | Bacteria     |
| CAG00624   | 1693 | 1 | 0     | unclassified                  | unclassified                 | unclassified   | unclassified |
| CAG00626   | 1687 | 1 | 0.333 | unclassified Firmicutes       | unclassified Firmicutes      | Firmicutes     | Bacteria     |
| CAG00628   | 1686 | 1 | 0.333 | unclassified Faecalibacterium | Faecalibacterium             | Firmicutes     | Bacteria     |
| CAG00629   | 1684 | 1 | 0     | Firmicutes bacterium CAG:124  | unclassified Firmicutes      | Firmicutes     | Bacteria     |
| CAG00637   | 1673 | 1 | 0     | unclassified Firmicutes       | unclassified Firmicutes      | Firmicutes     | Bacteria     |

|            |      |   |                                       |                               |                  |              |
|------------|------|---|---------------------------------------|-------------------------------|------------------|--------------|
| CAG00643   | 1670 | 1 | 0 unclassified                        | unclassified                  | unclassified     | unclassified |
| CAG00648   | 1667 | 1 | 0 unclassified Clostridiales          | unclassified Clostridiales    | Firmicutes       | Bacteria     |
| CAG00649   | 1667 | 1 | 0 unclassified Dorea                  | Dorea                         | Firmicutes       | Bacteria     |
| CAG00651   | 1667 | 1 | 0 Lachnospiraceae bacterium 1_4_56FAA | unclassified Lachnospiraceae  | Firmicutes       | Bacteria     |
| CAG00656   | 1664 | 1 | 0 Ruminococcus sp. CAG:488            | Ruminococcus                  | Firmicutes       | Bacteria     |
| CAG00659   | 1657 | 1 | 0.333 unclassified Clostridiales      | unclassified Clostridiales    | Firmicutes       | Bacteria     |
| CAG00669   | 1649 | 1 | 0.333 unclassified Firmicutes         | unclassified Firmicutes       | Firmicutes       | Bacteria     |
| CAG00675   | 1643 | 1 | 0 Clostridium sp. CAG:217             | unclassified Clostridiales    | Firmicutes       | Bacteria     |
| CAG00684   | 1634 | 1 | 0 unclassified Firmicutes             | unclassified Firmicutes       | Firmicutes       | Bacteria     |
| CAG00691   | 1628 | 1 | 0 unclassified                        | unclassified                  | unclassified     | unclassified |
| CAG00695   | 1618 | 1 | 0.333 unclassified Firmicutes         | unclassified Firmicutes       | Firmicutes       | Bacteria     |
| CAG00698   | 1612 | 1 | 0 unclassified Ruminococcus           | Ruminococcus                  | Firmicutes       | Bacteria     |
| CAG00710   | 1603 | 1 | 0 Enorma massiliensis                 | Enorma                        | Actinobacteria   | Bacteria     |
| CAG00712   | 1600 | 1 | 0 unclassified Proteobacteria         | unclassified Proteobacteria   | Proteobacteria   | Bacteria     |
| CAG00719   | 1591 | 1 | 0 unclassified Firmicutes             | unclassified Firmicutes       | Firmicutes       | Bacteria     |
| CAG00728   | 1580 | 1 | 0 Anaerotruncus sp. CAG:528           | Anaerotruncus                 | Firmicutes       | Bacteria     |
| CAG00738   | 1567 | 1 | 0 Ruminococcus sp. CAG:724            | Ruminococcus                  | Firmicutes       | Bacteria     |
| CAG00749   | 1554 | 1 | 0 unclassified Bacteria               | unclassified Bacteria         | unclassified Bac | Bacteria     |
| CAG00998   | 1546 | 1 | 0.333 Cryptobacterium sp. CAG:338     | Cryptobacterium               | Actinobacteria   | Bacteria     |
| CAG00762   | 1531 | 1 | 0 unclassified Eubacterium            | Eubacterium                   | Firmicutes       | Bacteria     |
| CAG00763   | 1531 | 1 | 0.333 unclassified Firmicutes         | unclassified Firmicutes       | Firmicutes       | Bacteria     |
| CAG00770   | 1522 | 1 | 0 unclassified Coriobacteriia         | unclassified Coriobacteriia   | Actinobacteria   | Bacteria     |
| CAG00777   | 1510 | 1 | 0 unclassified Coriobacteriales       | unclassified Coriobacteriales | Actinobacteria   | Bacteria     |
| CAG00781   | 1500 | 1 | 0.333 Firmicutes bacterium CAG:555    | unclassified Firmicutes       | Firmicutes       | Bacteria     |
| CAG00784   | 1498 | 1 | 0 unclassified Ruminococcaceae        | unclassified Ruminococcaceae  | Firmicutes       | Bacteria     |
| CAG00797   | 1484 | 1 | 0 Firmicutes bacterium CAG:341        | unclassified Firmicutes       | Firmicutes       | Bacteria     |
| CAG00799   | 1482 | 1 | 0 Dorea longicatena 1                 | Dorea                         | Firmicutes       | Bacteria     |
| CAG00812   | 1468 | 1 | 0 Catenibacterium sp. CAG:290         | Catenibacterium               | Firmicutes       | Bacteria     |
| CAG00818   | 1462 | 1 | 0 unclassified Coprobacillus          | Coprobacillus                 | Firmicutes       | Bacteria     |
| CAG00823   | 1459 | 1 | 0 unclassified                        | unclassified                  | unclassified     | unclassified |
| CAG00840   | 1440 | 1 | 0 unclassified                        | unclassified                  | unclassified     | unclassified |
| CAG00846   | 1430 | 1 | 0 unclassified Firmicutes             | unclassified Firmicutes       | Firmicutes       | Bacteria     |
| CAG00849   | 1428 | 1 | 0.333 unclassified Clostridiales      | unclassified Clostridiales    | Firmicutes       | Bacteria     |
| CAG00851   | 1422 | 1 | 0 unclassified Firmicutes             | unclassified Firmicutes       | Firmicutes       | Bacteria     |
| CAG00857   | 1400 | 1 | 0 Eubacterium sp. CAG:841             | Eubacterium                   | Firmicutes       | Bacteria     |
| CAG00859   | 1398 | 1 | 0 unclassified Firmicutes             | unclassified Firmicutes       | Firmicutes       | Bacteria     |
| CAG00865   | 1384 | 1 | 0 unclassified Clostridiales          | unclassified Clostridiales    | Firmicutes       | Bacteria     |
| CAG00870   | 1362 | 1 | 0 unclassified Firmicutes             | unclassified Firmicutes       | Firmicutes       | Bacteria     |
| CAG00872   | 1359 | 1 | 0 Firmicutes bacterium CAG:240        | unclassified Firmicutes       | Firmicutes       | Bacteria     |
| CAG00875   | 1354 | 1 | 0.333 unclassified Clostridiales      | unclassified Clostridiales    | Firmicutes       | Bacteria     |
| CAG00876   | 1354 | 1 | 0 unclassified Clostridiales          | unclassified Clostridiales    | Firmicutes       | Bacteria     |
| CAG00877   | 1353 | 1 | 0 unclassified Anaerotruncus          | Anaerotruncus                 | Firmicutes       | Bacteria     |
| CAG00005_2 | 1345 | 1 | 0 unclassified Olsenella              | Olsenella                     | Actinobacteria   | Bacteria     |
| CAG00901   | 1313 | 1 | 0 unclassified Firmicutes             | unclassified Firmicutes       | Firmicutes       | Bacteria     |
| CAG00907   | 1299 | 1 | 0 unclassified Firmicutes             | unclassified Firmicutes       | Firmicutes       | Bacteria     |
| CAG00914   | 1285 | 1 | 0 unclassified Clostridiales          | unclassified Clostridiales    | Firmicutes       | Bacteria     |
| CAG00985   | 1270 | 1 | 0 unclassified Oscillibacter          | Oscillibacter                 | Firmicutes       | Bacteria     |
| CAG00946   | 1234 | 1 | 0.333 unclassified Holdemanella       | Holdemanella                  | Firmicutes       | Bacteria     |
| CAG00951   | 1224 | 1 | 0 unclassified Clostridiales          | unclassified Clostridiales    | Firmicutes       | Bacteria     |
| CAG00952   | 1221 | 1 | 0 unclassified Lachnospiraceae        | unclassified Lachnospiraceae  | Firmicutes       | Bacteria     |
| CAG00956   | 1218 | 1 | 0 Faecalibacterium 7                  | Faecalibacterium              | Firmicutes       | Bacteria     |
| CAG00962   | 1212 | 1 | 0 Dorea longicatena 2                 | Dorea                         | Firmicutes       | Bacteria     |

|            |      |   |                                         |                              |                |              |
|------------|------|---|-----------------------------------------|------------------------------|----------------|--------------|
| CAG00967   | 1209 | 1 | 0.333 unclassified Firmicutes           | unclassified Firmicutes      | Firmicutes     | Bacteria     |
| CAG00970   | 1207 | 1 | 0.333 unclassified Firmicutes           | unclassified Firmicutes      | Firmicutes     | Bacteria     |
| CAG00978   | 1195 | 1 | 0 unclassified                          | unclassified                 | unclassified   | unclassified |
| CAG00984   | 1182 | 1 | 0.333 unclassified Oscillibacter        | Oscillibacter                | Firmicutes     | Bacteria     |
| CAG00988   | 1175 | 1 | 0 Clostridium sp. CAG:349               | unclassified Clostridiales   | Firmicutes     | Bacteria     |
| CAG00995   | 1170 | 1 | 0 Firmicutes bacterium CAG:475          | unclassified Firmicutes      | Firmicutes     | Bacteria     |
| CAG01002   | 1163 | 1 | 0 unclassified Coprobacillus            | Coprobacillus                | Firmicutes     | Bacteria     |
| CAG01011   | 1140 | 1 | 0 unclassified Dorea                    | Dorea                        | Firmicutes     | Bacteria     |
| CAG01019   | 1133 | 1 | 0 unclassified Eggerthellaceae          | unclassified Eggerthellaceae | Actinobacteria | Bacteria     |
| CAG01021   | 1130 | 1 | 0 unclassified Firmicutes               | unclassified Firmicutes      | Firmicutes     | Bacteria     |
| CAG01037   | 1104 | 1 | 0.333 unclassified Lachnospiraceae      | unclassified Lachnospiraceae | Firmicutes     | Bacteria     |
| CAG01038   | 1101 | 1 | 0 Acidaminococcus sp. CAG:917           | Acidaminococcus              | Firmicutes     | Bacteria     |
| CAG01040   | 1098 | 1 | 0 Clostridium asparagiforme             | Lachnoclostridium            | Firmicutes     | Bacteria     |
| CAG01048   | 1087 | 1 | 0 Clostridium sp. CAG:793               | unclassified Clostridiales   | Firmicutes     | Bacteria     |
| CAG01052   | 1082 | 1 | 0 Firmicutes bacterium CAG:103          | unclassified Firmicutes      | Firmicutes     | Bacteria     |
| CAG01637   | 1078 | 1 | 0 Firmicutes bacterium CAG:65           | unclassified Firmicutes      | Firmicutes     | Bacteria     |
| CAG01077   | 1049 | 1 | 0 unclassified Clostridiales            | unclassified Clostridiales   | Firmicutes     | Bacteria     |
| CAG01086   | 1037 | 1 | 0 unclassified Firmicutes               | unclassified Firmicutes      | Firmicutes     | Bacteria     |
| CAG01089   | 1028 | 1 | 0 unclassified Firmicutes               | unclassified Firmicutes      | Firmicutes     | Bacteria     |
| CAG01122   | 989  | 1 | 0 unclassified Desulfovibrio            | Desulfovibrio                | Proteobacteria | Bacteria     |
| CAG01140   | 964  | 1 | 0 unclassified                          | unclassified                 | unclassified   | unclassified |
| CAG02723   | 940  | 1 | 0 unclassified Olsenella                | Olsenella                    | Actinobacteria | Bacteria     |
| CAG01161   | 934  | 1 | 0 unclassified                          | unclassified                 | unclassified   | unclassified |
| CAG01215   | 832  | 1 | 0.333 unclassified Clostridiales        | unclassified Clostridiales   | Firmicutes     | Bacteria     |
| CAG00007_4 | 828  | 1 | 0 unclassified Firmicutes               | unclassified Firmicutes      | Firmicutes     | Bacteria     |
| CAG01223   | 819  | 1 | 0.333 unclassified Firmicutes           | unclassified Firmicutes      | Firmicutes     | Bacteria     |
| CAG01225   | 819  | 1 | 0 unclassified Firmicutes               | unclassified Firmicutes      | Firmicutes     | Bacteria     |
| CAG01227   | 815  | 1 | 0 unclassified                          | unclassified                 | unclassified   | unclassified |
| CAG01230   | 814  | 1 | 0 Clostridiales bacterium 1_7_47FAA & V | unclassified Clostridiales   | Firmicutes     | Bacteria     |
| CAG01232   | 811  | 1 | 0 unclassified                          | unclassified                 | unclassified   | unclassified |
| CAG01239   | 796  | 1 | 0 unclassified Blautia                  | Blautia                      | Firmicutes     | Bacteria     |
| CAG01247   | 777  | 1 | 0 Clostridium sp. D5                    | Clostridium                  | Firmicutes     | Bacteria     |
| CAG01250   | 774  | 1 | 0 unclassified                          | unclassified                 | unclassified   | unclassified |
| CAG01251   | 773  | 1 | 0 unclassified                          | unclassified                 | unclassified   | unclassified |
| CAG01252   | 771  | 1 | 0 Catenibacterium mitsuokai             | Catenibacterium              | Firmicutes     | Bacteria     |
| CAG01254   | 767  | 1 | 0 unclassified Firmicutes               | unclassified Firmicutes      | Firmicutes     | Bacteria     |
| CAG01256   | 760  | 1 | 0 unclassified Firmicutes               | unclassified Firmicutes      | Firmicutes     | Bacteria     |
| CAG01277   | 715  | 1 | 0 unclassified Clostridiales            | unclassified Clostridiales   | Firmicutes     | Bacteria     |
| CAG01281   | 711  | 1 | 0 unclassified Clostridiales            | unclassified Clostridiales   | Firmicutes     | Bacteria     |
| CAG01305   | 673  | 1 | 0 unclassified Firmicutes               | unclassified Firmicutes      | Firmicutes     | Bacteria     |
| CAG01326   | 631  | 1 | 0 unclassified Clostridium              | Clostridium                  | Firmicutes     | Bacteria     |
| CAG01344   | 607  | 1 | 0 unclassified Eggerthellaceae          | unclassified Eggerthellaceae | Actinobacteria | Bacteria     |
| CAG00006_4 | 597  | 1 | 0 unclassified Firmicutes               | unclassified Firmicutes      | Firmicutes     | Bacteria     |
| CAG01357   | 584  | 1 | 0 unclassified Firmicutes               | unclassified Firmicutes      | Firmicutes     | Bacteria     |
| CAG01372   | 563  | 1 | 0 unclassified Oscillibacter            | Oscillibacter                | Firmicutes     | Bacteria     |
| CAG01375   | 560  | 1 | 0 unclassified Firmicutes               | unclassified Firmicutes      | Firmicutes     | Bacteria     |
| CAG01379   | 554  | 1 | 0 unclassified Hungatella               | Hungatella                   | Firmicutes     | Bacteria     |
| CAG00096_2 | 528  | 1 | 0.333 unclassified                      | unclassified                 | unclassified   | unclassified |
| CAG01410   | 504  | 1 | 0 unclassified Firmicutes               | unclassified Firmicutes      | Firmicutes     | Bacteria     |
| CAG01442   | 441  | 1 | 0 unclassified Lachnoclostridium        | Lachnoclostridium            | Firmicutes     | Bacteria     |
| CAG01450   | 426  | 1 | 0 unclassified                          | unclassified                 | unclassified   | unclassified |
| CAG01471   | 402  | 1 | 0 unclassified Eubacterium              | Eubacterium                  | Firmicutes     | Bacteria     |

|            |       |   |                                               |                                |                |              |
|------------|-------|---|-----------------------------------------------|--------------------------------|----------------|--------------|
| CAG01473   | 401   | 1 | 0 unclassified                                | unclassified                   | unclassified   | unclassified |
| CAG01477   | 398   | 1 | 0 <i>Ruminococcus gnavus</i>                  | <i>Blautia</i>                 | Firmicutes     | Bacteria     |
| CAG50005   | 367   | 1 | 0 unclassified Clostridiales                  | unclassified Clostridiales     | Firmicutes     | Bacteria     |
| CAG01523   | 353   | 1 | 0 unclassified Firmicutes                     | unclassified Firmicutes        | Firmicutes     | Bacteria     |
| CAG01537   | 343   | 1 | 0 unclassified Firmicutes                     | unclassified Firmicutes        | Firmicutes     | Bacteria     |
| CAG01583   | 319   | 1 | 0 unclassified Firmicutes                     | unclassified Firmicutes        | Firmicutes     | Bacteria     |
| CAG01592   | 311   | 1 | 0 <i>Coprobacillus</i> sp. CAG:235            | <i>Coprobacillus</i>           | Firmicutes     | Bacteria     |
| CAG01809   | 258   | 1 | 0 unclassified <i>Lachnospiraceae</i>         | <i>Lachnospiraceae</i>         | Firmicutes     | Bacteria     |
| CAG00096_4 | 245   | 1 | 0.333 unclassified                            | unclassified                   | unclassified   | unclassified |
| CAG01738   | 229   | 1 | 0 unclassified Firmicutes                     | unclassified Firmicutes        | Firmicutes     | Bacteria     |
| CAG01773   | 215   | 1 | 0 unclassified Firmicutes                     | unclassified Firmicutes        | Firmicutes     | Bacteria     |
| CAG01804   | 205   | 1 | 0 unclassified <i>Lachnospiraceae</i>         | <i>Lachnospiraceae</i>         | Firmicutes     | Bacteria     |
| CAG01894   | 178   | 1 | 0 unclassified Firmicutes                     | unclassified Firmicutes        | Firmicutes     | Bacteria     |
| CAG01967   | 164   | 1 | 0 <i>Bilophila wadsworthia</i>                | <i>Bilophila</i>               | Proteobacteria | Bacteria     |
| CAG01992   | 156   | 1 | 0 unclassified                                | unclassified                   | unclassified   | unclassified |
| CAG02014   | 153   | 1 | 0 unclassified Firmicutes                     | unclassified Firmicutes        | Firmicutes     | Bacteria     |
| CAG02064   | 146   | 1 | 0 unclassified Firmicutes                     | unclassified Firmicutes        | Firmicutes     | Bacteria     |
| CAG02119   | 134   | 1 | 0 unclassified <i>Candidatus Stoquefichus</i> | <i>Candidatus Stoquefichus</i> | Firmicutes     | Bacteria     |
| CAG02176   | 125   | 1 | 0.333 unclassified                            | unclassified                   | unclassified   | unclassified |
| CAG02177   | 125   | 1 | 0 unclassified Firmicutes                     | unclassified Firmicutes        | Firmicutes     | Bacteria     |
| CAG02188   | 123   | 1 | 0 unclassified <i>Catenibacterium</i>         | <i>Catenibacterium</i>         | Firmicutes     | Bacteria     |
| CAG02251   | 116   | 1 | 0 unclassified Firmicutes                     | unclassified Firmicutes        | Firmicutes     | Bacteria     |
| CAG02376   | 101   | 1 | 0 unclassified Firmicutes                     | unclassified Firmicutes        | Firmicutes     | Bacteria     |
| CAG02391   | 99    | 1 | 0.333 unclassified                            | unclassified                   | unclassified   | unclassified |
| CAG02499   | 91    | 1 | 0 unclassified <i>Holdemanella</i>            | <i>Holdemanella</i>            | Firmicutes     | Bacteria     |
| CAG02608   | 82    | 1 | 0 unclassified Firmicutes                     | unclassified Firmicutes        | Firmicutes     | Bacteria     |
| CAG02627   | 81    | 1 | 0 unclassified                                | unclassified                   | unclassified   | unclassified |
| CAG02678   | 78    | 1 | 0 unclassified Ruminococcaceae                | unclassified Ruminococcaceae   | Firmicutes     | Bacteria     |
| CAG02736   | 75    | 1 | 0 unclassified                                | unclassified                   | unclassified   | unclassified |
| CAG02834   | 70    | 1 | 0 unclassified                                | unclassified                   | unclassified   | unclassified |
| CAG02850   | 69    | 1 | 0 uncultured <i>Faecalibacterium</i> sp.      | <i>Faecalibacterium</i>        | Firmicutes     | Bacteria     |
| CAG03042   | 61    | 1 | 0 <i>Clostridium clostridioforme</i>          | <i>Lachnospiraceae</i>         | Firmicutes     | Bacteria     |
| CAG03081   | 60    | 1 | 0 unclassified                                | unclassified                   | unclassified   | unclassified |
| CAG03192   | 56    | 1 | 0 unclassified                                | unclassified                   | unclassified   | unclassified |
| CAG03247   | 54    | 1 | 0 unclassified <i>Coprobacillus</i>           | <i>Coprobacillus</i>           | Firmicutes     | Bacteria     |
| CAG03390   | 50    | 1 | 0 unclassified                                | unclassified                   | unclassified   | unclassified |
| CAG00136   | 2680  | 0 | 0.667 <i>Enterobacter hormaechei</i>          | <i>Enterobacter</i>            | Proteobacteria | Bacteria     |
| CAG00362   | 2058  | 0 | 0.667 unclassified <i>Sutterella</i>          | <i>Sutterella</i>              | Proteobacteria | Bacteria     |
| CAG00001   | 12638 | 0 | 0.333 unclassified                            | unclassified                   | unclassified   | unclassified |
| CAG00002   | 11313 | 0 | 0.333 unclassified                            | unclassified                   | unclassified   | unclassified |
| CAG00003   | 10882 | 0 | 0.333 unclassified                            | unclassified                   | unclassified   | unclassified |
| CAG00008   | 6646  | 0 | 0.333 <i>Clostridium bolteae</i>              | <i>Lachnospiraceae</i>         | Firmicutes     | Bacteria     |
| CAG00012   | 5363  | 0 | 0.667 <i>Klebsiella pneumoniae</i> 1          | <i>Klebsiella</i>              | Proteobacteria | Bacteria     |
| CAG00017   | 4893  | 0 | 0.333 unclassified Lachnospiraceae            | unclassified Lachnospiraceae   | Firmicutes     | Bacteria     |
| CAG00034   | 3967  | 0 | 0.333 <i>Enterobacter cloacae</i> 2           | <i>Enterobacter</i>            | Proteobacteria | Bacteria     |
| CAG00043   | 3582  | 0 | 0.333 <i>Enterobacter asburiae</i>            | <i>Enterobacter</i>            | Proteobacteria | Bacteria     |
| CAG00067   | 3184  | 0 | 0.333 unclassified Clostridiales              | unclassified Clostridiales     | Firmicutes     | Bacteria     |
| CAG00090   | 2957  | 0 | 0.333 <i>Anaerostipes caccae</i>              | <i>Anaerostipes</i>            | Firmicutes     | Bacteria     |
| CAG00092   | 2951  | 0 | 0.667 unclassified <i>Comamonas</i>           | <i>Comamonas</i>               | Proteobacteria | Bacteria     |
| CAG00093   | 2937  | 0 | 0.667 <i>Klebsiella pneumoniae</i> 2          | <i>Klebsiella</i>              | Proteobacteria | Bacteria     |
| CAG00094   | 2936  | 0 | 0.333 <i>Clostridium</i> sp. 7_2_43FAA        | unclassified Clostridiales     | Firmicutes     | Bacteria     |
| CAG00114   | 2790  | 0 | 0.333 unclassified Lachnospiraceae            | unclassified Lachnospiraceae   | Firmicutes     | Bacteria     |

|            |      |   |                                                 |                               |                |              |
|------------|------|---|-------------------------------------------------|-------------------------------|----------------|--------------|
| CAG00115   | 2789 | 0 | 0.333 unclassified Lachnospiraceae              | unclassified Lachnospiraceae  | Firmicutes     | Bacteria     |
| CAG00122   | 2755 | 0 | 0.333 unclassified Lachnospiraceae              | unclassified Lachnospiraceae  | Firmicutes     | Bacteria     |
| CAG00127   | 2731 | 0 | 0.333 unclassified Lachnospiraceae              | unclassified Lachnospiraceae  | Firmicutes     | Bacteria     |
| CAG00134   | 2690 | 0 | 0.333 unclassified Cloacibacillus               | Cloacibacillus                | Synergistetes  | Bacteria     |
| CAG00153   | 2606 | 0 | 0.333 Hafnia paralvei                           | Hafnia                        | Proteobacteria | Bacteria     |
| CAG00160   | 2584 | 0 | 0.333 unclassified                              | unclassified                  | unclassified   | unclassified |
| CAG00177   | 2497 | 0 | 0.333 unclassified Megasphaera                  | Megasphaera                   | Firmicutes     | Bacteria     |
| CAG00185   | 2472 | 0 | 0.333 Veillonella sp. CAG:933                   | Veillonella                   | Firmicutes     | Bacteria     |
| CAG00186   | 2463 | 0 | 0.333 Streptococcus salivarius                  | Streptococcus                 | Firmicutes     | Bacteria     |
| CAG01575   | 322  | 0 | 0.333 Streptococcus gordonii                    | Streptococcus                 | Firmicutes     | Bacteria     |
| CAG01617   | 289  | 0 | 0.333 Streptococcus salivarius                  | Streptococcus                 | Firmicutes     | Bacteria     |
| CAG00187   | 2462 | 0 | 0.333 Sutterella wadsworthensis 1               | Sutterella                    | Proteobacteria | Bacteria     |
| CAG00205   | 2412 | 0 | 0.333 unclassified Megasphaera                  | Megasphaera                   | Firmicutes     | Bacteria     |
| CAG00217   | 2374 | 0 | 0.333 Dialister sp. CAG:357                     | Dialister                     | Firmicutes     | Bacteria     |
| CAG00226   | 2330 | 0 | 0.333 unclassified                              | unclassified                  | unclassified   | unclassified |
| CAG00228   | 2321 | 0 | 0.333 unclassified Firmicutes                   | unclassified Firmicutes       | Firmicutes     | Bacteria     |
| CAG00238   | 2284 | 0 | 0.333 Clostridium saccharolyticum               | Lachnospiraceae               | Firmicutes     | Bacteria     |
| CAG00239   | 2282 | 0 | 0.333 Flavonifractor plautii                    | Flavonifractor                | Firmicutes     | Bacteria     |
| CAG00252   | 2258 | 0 | 0.333 unclassified Sutterella                   | Sutterella                    | Proteobacteria | Bacteria     |
| CAG00263   | 2234 | 0 | 0.667 Klebsiella oxytoca                        | Klebsiella                    | Proteobacteria | Bacteria     |
| CAG00266   | 2229 | 0 | 0.333 Streptococcus lutetiensis                 | Streptococcus                 | Firmicutes     | Bacteria     |
| CAG00270   | 2225 | 0 | 0.333 Oscillibacter sp. KLE 1728 / KLE 1745 / V | Oscillibacter                 | Firmicutes     | Bacteria     |
| CAG00283   | 2196 | 0 | 0.333 Megasphaera sp. BL7 & NM10                | Megasphaera                   | Firmicutes     | Bacteria     |
| CAG00293   | 2177 | 0 | 0.333 Firmicutes bacterium CAG:145              | unclassified Firmicutes       | Firmicutes     | Bacteria     |
| CAG00299   | 2163 | 0 | 0.333 unclassified Proteobacteria               | unclassified Proteobacteria   | Proteobacteria | Bacteria     |
| CAG00302   | 2161 | 0 | 0.333 unclassified                              | unclassified                  | unclassified   | unclassified |
| CAG00310   | 2146 | 0 | 0.333 Sutterella parvirubra                     | Sutterella                    | Proteobacteria | Bacteria     |
| CAG00315   | 2139 | 0 | 0.333 Citrobacter freundii                      | Citrobacter                   | Proteobacteria | Bacteria     |
| CAG00320   | 2127 | 0 | 0.333 Phascolarctobacterium sp. CAG:207         | Phascolarctobacterium         | Firmicutes     | Bacteria     |
| CAG00325   | 2121 | 0 | 0.333 unclassified Sutterellaceae               | unclassified Sutterellaceae   | Proteobacteria | Bacteria     |
| CAG00326   | 2119 | 0 | 0.333 unclassified Firmicutes                   | unclassified Firmicutes       | Firmicutes     | Bacteria     |
| CAG00068_1 | 2117 | 0 | 0.333 unclassified                              | unclassified                  | unclassified   | unclassified |
| CAG00329   | 2113 | 0 | 0.333 Roseburia hominis                         | Roseburia                     | Firmicutes     | Bacteria     |
| CAG00331   | 2111 | 0 | 0.333 unclassified Eggerthella                  | Eggerthella                   | Actinobacteria | Bacteria     |
| CAG00335   | 2102 | 0 | 0.333 Anaerostipes hadrus                       | Anaerostipes                  | Firmicutes     | Bacteria     |
| CAG00372   | 2047 | 0 | 0.333 unclassified Clostridiales                | unclassified Clostridiales    | Firmicutes     | Bacteria     |
| CAG00405   | 2000 | 0 | 0.333 unclassified Firmicutes                   | unclassified Firmicutes       | Firmicutes     | Bacteria     |
| CAG00417   | 1981 | 0 | 0.333 Megamonas funiformis                      | Megamonas                     | Firmicutes     | Bacteria     |
| CAG00423   | 1975 | 0 | 0.333 unclassified Dialister                    | Dialister                     | Firmicutes     | Bacteria     |
| CAG00434   | 1965 | 0 | 0.333 Ruminococcus champanellensis              | Ruminococcus                  | Firmicutes     | Bacteria     |
| CAG00437   | 1962 | 0 | 0.333 unclassified Burkholderiales              | unclassified Burkholderiales  | Proteobacteria | Bacteria     |
| CAG00439   | 1952 | 0 | 0.333 unclassified Flavonifractor               | Flavonifractor                | Firmicutes     | Bacteria     |
| CAG00457   | 1940 | 0 | 0.333 unclassified Fusobacterium                | Fusobacterium                 | Fusobacteria   | Bacteria     |
| CAG00459   | 1939 | 0 | 0.333 unclassified Proteobacteria               | unclassified Proteobacteria   | Proteobacteria | Bacteria     |
| CAG00461   | 1936 | 0 | 0.333 Azospirillum sp. CAG:260                  | Azospirillum                  | Proteobacteria | Bacteria     |
| CAG00462   | 1935 | 0 | 0.333 Streptococcus pasteurianus                | Streptococcus                 | Firmicutes     | Bacteria     |
| CAG00472   | 1921 | 0 | 0.333 unclassified                              | unclassified                  | unclassified   | unclassified |
| CAG00474   | 1919 | 0 | 0.333 Sutterella wadsworthensis 2               | Sutterella                    | Proteobacteria | Bacteria     |
| CAG00484   | 1903 | 0 | 0.333 Sutterella sp. CAG:397                    | Sutterella                    | Proteobacteria | Bacteria     |
| CAG00489   | 1894 | 0 | 0.333 unclassified                              | unclassified                  | unclassified   | unclassified |
| CAG00496   | 1884 | 0 | 0.333 Fusobacterium mortiferum                  | Fusobacterium                 | Fusobacteria   | Bacteria     |
| CAG00514   | 1851 | 0 | 0.333 unclassified Rhodospirillales             | unclassified Rhodospirillales | Proteobacteria | Bacteria     |

|            |      |   |                                          |                                |                |              |
|------------|------|---|------------------------------------------|--------------------------------|----------------|--------------|
| CAG00519   | 1837 | 0 | 0.333 unclassified Lachnospirillum       | Lachnospirillum                | Firmicutes     | Bacteria     |
| CAG00540   | 1802 | 0 | 0.333 unclassified Sutterella            | Sutterella                     | Proteobacteria | Bacteria     |
| CAG00561   | 1774 | 0 | 0.333 unclassified Betaproteobacteria    | unclassified Betaproteobacteri | Proteobacteria | Bacteria     |
| CAG00576   | 1745 | 0 | 0.333 unclassified Firmicutes            | unclassified Firmicutes        | Firmicutes     | Bacteria     |
| CAG00593   | 1728 | 0 | 0.333 unclassified Phascolarctobacterium | Phascolarctobacterium          | Firmicutes     | Bacteria     |
| CAG00594   | 1726 | 0 | 0.333 unclassified Eggerthella           | Eggerthella                    | Actinobacteria | Bacteria     |
| CAG00617   | 1699 | 0 | 0.333 Acetobacter sp. CAG:977            | Acetobacter                    | Proteobacteria | Bacteria     |
| CAG00638   | 1673 | 0 | 0.333 unclassified Lachnospirillum       | Lachnospirillum                | Firmicutes     | Bacteria     |
| CAG00647   | 1668 | 0 | 0.333 unclassified Sutterella            | Sutterella                     | Proteobacteria | Bacteria     |
| CAG00652   | 1667 | 0 | 0.333 unclassified Sutterella            | Sutterella                     | Proteobacteria | Bacteria     |
| CAG00654   | 1666 | 0 | 0.333 Ruminococcus sp. CAG:624           | Ruminococcus                   | Firmicutes     | Bacteria     |
| CAG00657   | 1663 | 0 | 0.333 unclassified Sutterella            | Sutterella                     | Proteobacteria | Bacteria     |
| CAG00663   | 1656 | 0 | 0.333 unclassified Burkholderiales       | unclassified Burkholderiales   | Proteobacteria | Bacteria     |
| CAG00668   | 1649 | 0 | 0.333 unclassified Rhodospirillales      | unclassified Rhodospirillales  | Proteobacteria | Bacteria     |
| CAG00699   | 1612 | 0 | 0.333 Veillonella ratti                  | Veillonella                    | Firmicutes     | Bacteria     |
| CAG00727   | 1580 | 0 | 0.333 Eggerthella lenta                  | Eggerthella                    | Actinobacteria | Bacteria     |
| CAG00730   | 1576 | 0 | 0.333 unclassified Dialister             | Dialister                      | Firmicutes     | Bacteria     |
| CAG00731   | 1576 | 0 | 0.333 Parasutterella excrementihominis 2 | Parasutterella                 | Proteobacteria | Bacteria     |
| CAG00745   | 1558 | 0 | 0.333 Dialister invisus                  | Dialister                      | Firmicutes     | Bacteria     |
| CAG00746   | 1557 | 0 | 0.333 unclassified                       | unclassified                   | unclassified   | unclassified |
| CAG00753   | 1549 | 0 | 0.333 Azospirillum sp. CAG:239           | Azospirillum                   | Proteobacteria | Bacteria     |
| CAG00779   | 1507 | 0 | 0.333 unclassified Megasphaera           | Megasphaera                    | Firmicutes     | Bacteria     |
| CAG00787   | 1495 | 0 | 0.333 Dialister sp. CAG:486              | Dialister                      | Firmicutes     | Bacteria     |
| CAG00788   | 1495 | 0 | 0.333 Eggerthella sp. CAG:1427           | Eggerthella                    | Actinobacteria | Bacteria     |
| CAG00801   | 1481 | 0 | 0.333 unclassified Burkholderiales       | unclassified Burkholderiales   | Proteobacteria | Bacteria     |
| CAG00834   | 1446 | 0 | 0.333 Oxalobacter formigenes             | Oxalobacter                    | Proteobacteria | Bacteria     |
| CAG00836   | 1443 | 0 | 0.333 Fusobacterium gonidiaformans       | Fusobacterium                  | Fusobacteria   | Bacteria     |
| CAG00838   | 1443 | 0 | 0.333 unclassified                       | unclassified                   | unclassified   | unclassified |
| CAG00847   | 1429 | 0 | 0.333 unclassified Sutterella            | Sutterella                     | Proteobacteria | Bacteria     |
| CAG00858   | 1400 | 0 | 0.333 Streptococcus thermophilus         | Streptococcus                  | Firmicutes     | Bacteria     |
| CAG00879   | 1352 | 0 | 0.333 unclassified Ruminococcaceae       | unclassified Ruminococcaceae   | Firmicutes     | Bacteria     |
| CAG00881   | 1351 | 0 | 0.333 unclassified Dialister             | Dialister                      | Firmicutes     | Bacteria     |
| CAG00885   | 1336 | 0 | 0.333 Phascolarctobacterium sp. CAG:266  | Phascolarctobacterium          | Firmicutes     | Bacteria     |
| CAG00886   | 1334 | 0 | 0.333 Sutterella sp. CAG:351             | Sutterella                     | Proteobacteria | Bacteria     |
| CAG00889   | 1328 | 0 | 0.333 Megasphaera elsdenii               | Megasphaera                    | Firmicutes     | Bacteria     |
| CAG00898   | 1318 | 0 | 0.333 unclassified Eggerthella           | Eggerthella                    | Actinobacteria | Bacteria     |
| CAG00902   | 1309 | 0 | 0.333 Firmicutes bacterium CAG:822       | unclassified Firmicutes        | Firmicutes     | Bacteria     |
| CAG00005_4 | 503  | 0 | 0.333 unclassified Clostridiales         | unclassified Clostridiales     | Firmicutes     | Bacteria     |
| CAG00909   | 1297 | 0 | 0.333 Parasutterella excrementihominis 1 | Parasutterella                 | Proteobacteria | Bacteria     |
| CAG00929   | 1264 | 0 | 0.333 Eggerthella sp. CAG:368            | Eggerthella                    | Actinobacteria | Bacteria     |
| CAG00931   | 1257 | 0 | 0.333 unclassified Oscillibacter         | Oscillibacter                  | Firmicutes     | Bacteria     |
| CAG00936   | 1245 | 0 | 0.333 Eggerthella sp. CAG:209            | Eggerthella                    | Actinobacteria | Bacteria     |
| CAG00975   | 1201 | 0 | 0.333 Veillonella atypica                | Veillonella                    | Firmicutes     | Bacteria     |
| CAG01026   | 1179 | 0 | 0.333 Peptoniphilus harei                | Peptoniphilus                  | Firmicutes     | Bacteria     |
| CAG00993   | 1171 | 0 | 0.333 unclassified Phascolarctobacterium | Phascolarctobacterium          | Firmicutes     | Bacteria     |
| CAG01007   | 1159 | 0 | 0.333 unclassified Burkholderiales       | unclassified Burkholderiales   | Proteobacteria | Bacteria     |
| CAG01046   | 1089 | 0 | 0.333 unclassified Clostridiales         | unclassified Clostridiales     | Firmicutes     | Bacteria     |
| CAG01053   | 1081 | 0 | 0.333 unclassified                       | unclassified                   | unclassified   | unclassified |
| CAG01060   | 1074 | 0 | 0.333 unclassified Burkholderiales       | unclassified Burkholderiales   | Proteobacteria | Bacteria     |
| CAG00007_3 | 1061 | 0 | 0.333 unclassified Clostridiales         | unclassified Clostridiales     | Firmicutes     | Bacteria     |
| CAG01115   | 999  | 0 | 0.333 Eggerthella sp. CAG:298            | Eggerthella                    | Actinobacteria | Bacteria     |
| CAG01128   | 980  | 0 | 0.333 unclassified Dialister             | Dialister                      | Firmicutes     | Bacteria     |

|          |      |   |                                                |                              |                |              |
|----------|------|---|------------------------------------------------|------------------------------|----------------|--------------|
| CAG01131 | 977  | 0 | 0.333 Sutterella sp. CAG:521                   | Sutterella                   | Proteobacteria | Bacteria     |
| CAG01133 | 975  | 0 | 0.333 Senegalimassilia anaerobia               | Senegalimassilia             | Actinobacteria | Bacteria     |
| CAG01148 | 954  | 0 | 0.333 Clostridium scindens                     | Lachnospiraceae              | Firmicutes     | Bacteria     |
| CAG01203 | 860  | 0 | 0.333 Streptococcus mutans                     | Streptococcus                | Firmicutes     | Bacteria     |
| CAG01205 | 855  | 0 | 0.333 Phascolarctobacterium succinatutens      | Phascolarctobacterium        | Firmicutes     | Bacteria     |
| CAG01259 | 755  | 0 | 0.333 Streptococcus oralis                     | Streptococcus                | Firmicutes     | Bacteria     |
| CAG01272 | 726  | 0 | 0.333 Adlercreutzia equolifaciens              | Adlercreutzia                | Actinobacteria | Bacteria     |
| CAG01291 | 686  | 0 | 0.333 unclassified Clostridiales               | unclassified Clostridiales   | Firmicutes     | Bacteria     |
| CAG01295 | 682  | 0 | 0.333 unclassified Burkholderiales             | unclassified Burkholderiales | Proteobacteria | Bacteria     |
| CAG01298 | 678  | 0 | 0.333 Oxalobacter formigenes                   | Oxalobacter                  | Proteobacteria | Bacteria     |
| CAG01306 | 670  | 0 | 0.333 unclassified Oscillibacter               | Oscillibacter                | Firmicutes     | Bacteria     |
| CAG01339 | 614  | 0 | 0.333 Peptoniphilus lacrimalis                 | Peptoniphilus                | Firmicutes     | Bacteria     |
| CAG01348 | 601  | 0 | 0.333 unclassified Lachnospiraceae             | Lachnospiraceae              | Firmicutes     | Bacteria     |
| CAG01366 | 571  | 0 | 0.333 Streptococcus parasanguinis              | Streptococcus                | Firmicutes     | Bacteria     |
| CAG01399 | 524  | 0 | 0.333 unclassified Oscillibacter               | Oscillibacter                | Firmicutes     | Bacteria     |
| CAG01551 | 508  | 0 | 0.333 unclassified Oscillibacter               | Oscillibacter                | Firmicutes     | Bacteria     |
| CAG01644 | 278  | 0 | 0.333 unclassified Firmicutes                  | unclassified Firmicutes      | Firmicutes     | Bacteria     |
| CAG01780 | 212  | 0 | 0.333 butyrate-producing bacterium SS3/4 - Cl  | unclassified Clostridiales   | Firmicutes     | Bacteria     |
| CAG01846 | 190  | 0 | 0.333 unclassified Ruminococcus                | Ruminococcus                 | Firmicutes     | Bacteria     |
| CAG01871 | 184  | 0 | 0.333 Eggerthella sp. CAG:298                  | Eggerthella                  | Actinobacteria | Bacteria     |
| CAG01881 | 181  | 0 | 0.333 Anaeroglobus geminatus                   | Anaeroglobus                 | Firmicutes     | Bacteria     |
| CAG02026 | 152  | 0 | 0.333 unclassified Clostridiales               | unclassified Clostridiales   | Firmicutes     | Bacteria     |
| CAG02067 | 146  | 0 | 0.333 Dialister succinatiphilus                | Dialister                    | Firmicutes     | Bacteria     |
| CAG02116 | 135  | 0 | 0.333 unclassified Sutterella                  | Sutterella                   | Proteobacteria | Bacteria     |
| CAG02385 | 100  | 0 | 0.333 unclassified                             | unclassified                 | unclassified   | unclassified |
| CAG02988 | 63   | 0 | 0.333 unclassified Clostridiales               | unclassified Clostridiales   | Firmicutes     | Bacteria     |
| CAG00009 | 6333 | 0 | 0.333 unclassified Lachnospiraceae             | unclassified Lachnospiraceae | Firmicutes     | Bacteria     |
| CAG00020 | 4814 | 0 | 0.333 Clostridium sp. KLE 1755 & Clostridiales | unclassified Clostridiales   | Firmicutes     | Bacteria     |
| CAG00021 | 4703 | 0 | 0.333 Clostridium butyricum                    | Clostridium                  | Firmicutes     | Bacteria     |
| CAG01028 | 4286 | 0 | 0.333 Ruminococcaceae bacterium LM158          | unclassified Ruminococcaceae | Firmicutes     | Bacteria     |
| CAG00035 | 3871 | 0 | 0.333 unclassified Clostridiales               | unclassified Clostridiales   | Firmicutes     | Bacteria     |
| CAG00490 | 3314 | 0 | 0.333 Coprococcus sp. CAG:131 & Coprococcus    | Coprococcus                  | Firmicutes     | Bacteria     |
| CAG00601 | 3250 | 0 | 0.333 unclassified Faecalibacterium            | Faecalibacterium             | Firmicutes     | Bacteria     |
| CAG00146 | 3173 | 0 | 0.333 unclassified Butyrivibrio                | Butyrivibrio                 | Bacteroidetes  | Bacteria     |
| CAG01051 | 3142 | 0 | 0.333 unclassified Oscillibacter               | Oscillibacter                | Firmicutes     | Bacteria     |
| CAG00072 | 3133 | 0 | 0.333 Odoribacter laneus                       | Odoribacter                  | Bacteroidetes  | Bacteria     |
| CAG00083 | 3030 | 0 | 0.333 Odoribacter sp. CAG:788                  | Odoribacter                  | Bacteroidetes  | Bacteria     |
| CAG00100 | 2893 | 0 | 0.333 Clostridium sp. JCC                      | unclassified Clostridiales   | Firmicutes     | Bacteria     |
| CAG00102 | 2875 | 0 | 0.333 unclassified Lachnospiraceae             | unclassified Lachnospiraceae | Firmicutes     | Bacteria     |
| CAG00580 | 2835 | 0 | 0.333 Clostridium sp. CAG:62                   | unclassified Clostridiales   | Firmicutes     | Bacteria     |
| CAG00108 | 2820 | 0 | 0.333 Clostridium paraputrificum               | Clostridium                  | Firmicutes     | Bacteria     |
| CAG00109 | 2808 | 0 | 0.333 unclassified Fusobacterium               | Fusobacterium                | Fusobacteria   | Bacteria     |
| CAG00119 | 2762 | 0 | 0.333 unclassified Clostridium                 | Clostridium                  | Firmicutes     | Bacteria     |
| CAG00123 | 2745 | 0 | 0.333 unclassified Clostridiales               | unclassified Clostridiales   | Firmicutes     | Bacteria     |
| CAG00267 | 2738 | 0 | 0.333 Clostridium sp. CAG:58                   | unclassified Clostridiales   | Firmicutes     | Bacteria     |
| CAG00137 | 2673 | 0 | 0.333 unclassified Firmicutes                  | unclassified Firmicutes      | Firmicutes     | Bacteria     |
| CAG00144 | 2645 | 0 | 0.333 Fusobacterium ulcerans                   | Fusobacterium                | Fusobacteria   | Bacteria     |
| CAG00145 | 2638 | 0 | 0.333 unclassified Clostridiales               | unclassified Clostridiales   | Firmicutes     | Bacteria     |
| CAG00260 | 2624 | 0 | 0.333 Acidaminococcus intestini                | Acidaminococcus              | Firmicutes     | Bacteria     |
| CAG00156 | 2594 | 0 | 0.333 Brachyspira aalborgi                     | Brachyspira                  | Spirochaetes   | Bacteria     |
| CAG00854 | 2572 | 0 | 0.333 unclassified Firmicutes                  | unclassified Firmicutes      | Firmicutes     | Bacteria     |
| CAG00563 | 2567 | 0 | 0.333 Clostridium sp. CAG:91                   | unclassified Clostridiales   | Firmicutes     | Bacteria     |



|            |      |   |       |                                           |                                  |                |          |
|------------|------|---|-------|-------------------------------------------|----------------------------------|----------------|----------|
| CAG00166   | 2542 | 0 | 0.333 | unclassified Clostridiales                | unclassified Clostridiales       | Firmicutes     | Bacteria |
| CAG00005_1 | 2507 | 0 | 0.333 | unclassified Firmicutes                   | unclassified Firmicutes          | Firmicutes     | Bacteria |
| CAG00894   | 1321 | 0 | 0.333 | unclassified Firmicutes                   | unclassified Firmicutes          | Firmicutes     | Bacteria |
| CAG00189   | 2459 | 0 | 0.333 | Roseburia sp. CAG:100                     | Roseburia                        | Firmicutes     | Bacteria |
| CAG00191   | 2450 | 0 | 0.333 | Fusobacterium varium                      | Fusobacterium                    | Fusobacteria   | Bacteria |
| CAG00192   | 2447 | 0 | 0.333 | unclassified Firmicutes                   | unclassified Firmicutes          | Firmicutes     | Bacteria |
| CAG00194   | 2436 | 0 | 0.333 | Eubacterium hallii                        | Eubacterium                      | Firmicutes     | Bacteria |
| CAG00196   | 2434 | 0 | 0.333 | Firmicutes bacterium CAG:534              | unclassified Firmicutes          | Firmicutes     | Bacteria |
| CAG00201   | 2419 | 0 | 0.333 | unclassified Roseburia                    | Roseburia                        | Firmicutes     | Bacteria |
| CAG00203   | 2416 | 0 | 0.333 | unclassified Oscillibacter                | Oscillibacter                    | Firmicutes     | Bacteria |
| CAG00207   | 2398 | 0 | 0.333 | Clostridium sp. CAG:411                   | unclassified Clostridiales       | Firmicutes     | Bacteria |
| CAG00208   | 2397 | 0 | 0.333 | Faecalibacterium 8 (Ruminococcus sp. CA   | Faecalibacterium                 | Firmicutes     | Bacteria |
| CAG00212   | 2388 | 0 | 0.333 | Bilophila wadsworthia                     | Bilophila                        | Proteobacteria | Bacteria |
| CAG00216   | 2379 | 0 | 0.333 | unclassified Roseburia                    | Roseburia                        | Firmicutes     | Bacteria |
| CAG00221   | 2362 | 0 | 0.333 | unclassified Clostridiales                | unclassified Clostridiales       | Firmicutes     | Bacteria |
| CAG00006_1 | 2362 | 0 | 0.333 | unclassified Oscillibacter                | Oscillibacter                    | Firmicutes     | Bacteria |
| CAG00023_1 | 2356 | 0 | 0.333 | Clostridium celatum                       | Clostridium                      | Firmicutes     | Bacteria |
| CAG00261   | 2342 | 0 | 0.333 | unclassified Oscillibacter                | Oscillibacter                    | Firmicutes     | Bacteria |
| CAG00231   | 2306 | 0 | 0.333 | Odoribacter splanchnicus                  | Odoribacter                      | Bacteroidetes  | Bacteria |
| CAG00232   | 2301 | 0 | 0.333 | unclassified Ruminococcaceae              | unclassified Ruminococcaceae     | Firmicutes     | Bacteria |
| CAG00233   | 2301 | 0 | 0.333 | unclassified Clostridiales                | unclassified Clostridiales       | Firmicutes     | Bacteria |
| CAG00237   | 2287 | 0 | 0.333 | unclassified Butyricimonas                | Butyricimonas                    | Bacteroidetes  | Bacteria |
| CAG00240   | 2282 | 0 | 0.333 | Oscillibacter sp. CAG:155                 | Oscillibacter                    | Firmicutes     | Bacteria |
| CAG00242   | 2278 | 0 | 0.333 | Roseburia sp. CAG:197                     | Roseburia                        | Firmicutes     | Bacteria |
| CAG00248   | 2268 | 0 | 0.333 | Roseburia sp. CAG:45                      | Roseburia                        | Firmicutes     | Bacteria |
| CAG00256   | 2252 | 0 | 0.333 | unclassified Lachnospiraceae              | unclassified Lachnospiraceae     | Firmicutes     | Bacteria |
| CAG00265   | 2230 | 0 | 0.333 | Firmicutes bacterium CAG:194              | unclassified Firmicutes          | Firmicutes     | Bacteria |
| CAG00268   | 2227 | 0 | 0.333 | Firmicutes bacterium CAG:24 & uncultur    | unclassified Firmicutes          | Firmicutes     | Bacteria |
| CAG00274   | 2209 | 0 | 0.333 | Erysipelotrichaceae bacterium 5_2_54F/    | unclassified Erysipelotrichaceae | Firmicutes     | Bacteria |
| CAG00275   | 2207 | 0 | 0.333 | Roseburia sp. CAG:18                      | Roseburia                        | Firmicutes     | Bacteria |
| CAG00280   | 2199 | 0 | 0.333 | Prevotella sp. CAG:485                    | Prevotella                       | Bacteroidetes  | Bacteria |
| CAG00282   | 2196 | 0 | 0.333 | Clostridium sp. CAG:277                   | unclassified Clostridiales       | Firmicutes     | Bacteria |
| CAG00826   | 2193 | 0 | 0.333 | unclassified Clostridiales                | unclassified Clostridiales       | Firmicutes     | Bacteria |
| CAG00288   | 2189 | 0 | 0.333 | Firmicutes bacterium CAG:95               | unclassified Firmicutes          | Firmicutes     | Bacteria |
| CAG00297   | 2174 | 0 | 0.333 | unclassified Faecalibacterium             | Faecalibacterium                 | Firmicutes     | Bacteria |
| CAG00303   | 2160 | 0 | 0.333 | unclassified Clostridiales                | unclassified Clostridiales       | Firmicutes     | Bacteria |
| CAG00306   | 2154 | 0 | 0.333 | Clostridium sp. CAG:221 - Clostridium sp. | unclassified Clostridiales       | Firmicutes     | Bacteria |
| CAG00307   | 2153 | 0 | 0.333 | Clostridium sp. CAG:590                   | unclassified Clostridiales       | Firmicutes     | Bacteria |
| CAG00312   | 2140 | 0 | 0.333 | unclassified Bacteroidetes                | unclassified Bacteroidetes       | Bacteroidetes  | Bacteria |
| CAG00317   | 2130 | 0 | 0.333 | Clostridium sp. CAG:230                   | unclassified Clostridiales       | Firmicutes     | Bacteria |
| CAG00319   | 2128 | 0 | 0.333 | unclassified Butyricimonas                | Butyricimonas                    | Bacteroidetes  | Bacteria |
| CAG00321   | 2126 | 0 | 0.333 | Clostridium sp. CAG:138                   | unclassified Clostridiales       | Firmicutes     | Bacteria |
| CAG00322   | 2126 | 0 | 0.333 | unclassified Lachnospiraceae              | unclassified Lachnospiraceae     | Firmicutes     | Bacteria |
| CAG00337   | 2102 | 0 | 0.333 | unclassified Faecalibacterium             | Faecalibacterium                 | Firmicutes     | Bacteria |
| CAG00338   | 2100 | 0 | 0.333 | unclassified Megasphaera                  | Megasphaera                      | Firmicutes     | Bacteria |
| CAG00346   | 2092 | 0 | 0.333 | unclassified Eubacterium                  | Eubacterium                      | Firmicutes     | Bacteria |
| CAG00352   | 2078 | 0 | 0.333 | unclassified Acidaminococcus              | Acidaminococcus                  | Firmicutes     | Bacteria |
| CAG00358   | 2063 | 0 | 0.333 | Clostridium sp. CAG:632                   | unclassified Clostridiales       | Firmicutes     | Bacteria |
| CAG00361   | 2061 | 0 | 0.333 | unclassified Acidaminococcus              | Acidaminococcus                  | Firmicutes     | Bacteria |
| CAG00363   | 2056 | 0 | 0.333 | unclassified Clostridiales                | unclassified Clostridiales       | Firmicutes     | Bacteria |
| CAG00366   | 2055 | 0 | 0.333 | Coprococcus comes                         | Coprococcus                      | Firmicutes     | Bacteria |
| CAG00382   | 2033 | 0 | 0.333 | unclassified Clostridiales                | unclassified Clostridiales       | Firmicutes     | Bacteria |

|          |      |   |       |                                  |                                  |               |          |
|----------|------|---|-------|----------------------------------|----------------------------------|---------------|----------|
| CAG00385 | 2032 | 0 | 0.333 | Eubacterium desmolans            | Eubacterium                      | Firmicutes    | Bacteria |
| CAG00568 | 2026 | 0 | 0.333 | unclassified Faecalibacterium    | Faecalibacterium                 | Firmicutes    | Bacteria |
| CAG00387 | 2025 | 0 | 0.333 | unclassified Lachnospiraceae     | unclassified Lachnospiraceae     | Firmicutes    | Bacteria |
| CAG00390 | 2020 | 0 | 0.333 | Butyrivibrio sp. CAG:318         | Butyrivibrio                     | Firmicutes    | Bacteria |
| CAG00398 | 2005 | 0 | 0.333 | unclassified Lachnospiraceae     | unclassified Lachnospiraceae     | Firmicutes    | Bacteria |
| CAG00407 | 1998 | 0 | 0.333 | unclassified Lachnospiraceae     | unclassified Lachnospiraceae     | Firmicutes    | Bacteria |
| CAG00408 | 1997 | 0 | 0.333 | Clostridium sp. CAG:75           | unclassified Clostridiales       | Firmicutes    | Bacteria |
| CAG00410 | 1993 | 0 | 0.333 | unclassified Erysipelotrichaceae | unclassified Erysipelotrichaceae | Firmicutes    | Bacteria |
| CAG01600 | 304  | 0 | 0.333 | unclassified Eubacterium         | Eubacterium                      | Firmicutes    | Bacteria |
| CAG00422 | 1976 | 0 | 0.333 | unclassified Oscillibacter       | Oscillibacter                    | Firmicutes    | Bacteria |
| CAG00428 | 1970 | 0 | 0.333 | Eubacterium sp. CAG:603          | Eubacterium                      | Firmicutes    | Bacteria |
| CAG00435 | 1965 | 0 | 0.333 | unclassified Oscillibacter       | Oscillibacter                    | Firmicutes    | Bacteria |
| CAG00436 | 1963 | 0 | 0.333 | Clostridium sp. CAG:299          | unclassified Clostridiales       | Firmicutes    | Bacteria |
| CAG00446 | 1946 | 0 | 0.333 | unclassified Clostridiales       | unclassified Clostridiales       | Firmicutes    | Bacteria |
| CAG00448 | 1945 | 0 | 0.333 | Clostridium sp. CAG:122          | unclassified Clostridiales       | Firmicutes    | Bacteria |
| CAG00449 | 1945 | 0 | 0.333 | Clostridium sp. CAG:253          | unclassified Clostridiales       | Firmicutes    | Bacteria |
| CAG00450 | 1944 | 0 | 0.333 | unclassified Firmicutes          | unclassified Firmicutes          | Firmicutes    | Bacteria |
| CAG00452 | 1942 | 0 | 0.333 | Clostridium sp. CAG:167          | unclassified Clostridiales       | Firmicutes    | Bacteria |
| CAG00455 | 1941 | 0 | 0.333 | unclassified Firmicutes          | unclassified Firmicutes          | Firmicutes    | Bacteria |
| CAG00458 | 1939 | 0 | 0.333 | Fusobacterium nucleatum          | Fusobacterium                    | Fusobacteria  | Bacteria |
| CAG00463 | 1934 | 0 | 0.333 | Faecalibacterium 6               | Faecalibacterium                 | Firmicutes    | Bacteria |
| CAG00469 | 1928 | 0 | 0.333 | Eubacterium sp. CAG:146          | Eubacterium                      | Firmicutes    | Bacteria |
| CAG00485 | 1901 | 0 | 0.333 | unclassified Roseburia           | Roseburia                        | Firmicutes    | Bacteria |
| CAG00493 | 1887 | 0 | 0.333 | Clostridium sp. CAG:127          | unclassified Clostridiales       | Firmicutes    | Bacteria |
| CAG00502 | 1871 | 0 | 0.333 | Eubacterium sp. CAG:161          | Eubacterium                      | Firmicutes    | Bacteria |
| CAG00505 | 1866 | 0 | 0.333 | unclassified Firmicutes          | unclassified Firmicutes          | Firmicutes    | Bacteria |
| CAG00506 | 1864 | 0 | 0.333 | unclassified Ruminococcaceae     | unclassified Ruminococcaceae     | Firmicutes    | Bacteria |
| CAG00511 | 1857 | 0 | 0.333 | Firmicutes bacterium CAG:791     | unclassified Firmicutes          | Firmicutes    | Bacteria |
| CAG00516 | 1848 | 0 | 0.333 | unclassified Lachnospiraceae     | unclassified Lachnospiraceae     | Firmicutes    | Bacteria |
| CAG00531 | 1819 | 0 | 0.333 | unclassified Faecalibacterium    | Faecalibacterium                 | Firmicutes    | Bacteria |
| CAG00539 | 1802 | 0 | 0.333 | unclassified Clostridiales       | unclassified Clostridiales       | Firmicutes    | Bacteria |
| CAG00542 | 1799 | 0 | 0.333 | Butyrivibrio crossotus           | Butyrivibrio                     | Firmicutes    | Bacteria |
| CAG00547 | 1792 | 0 | 0.333 | unclassified Faecalibacterium    | Faecalibacterium                 | Firmicutes    | Bacteria |
| CAG00548 | 1789 | 0 | 0.333 | Coprococcus sp. CAG:782          | Coprococcus                      | Firmicutes    | Bacteria |
| CAG00562 | 1778 | 0 | 0.333 | Eubacterium dolichum             | unclassified Erysipelotrichaceae | Firmicutes    | Bacteria |
| CAG50002 | 1766 | 0 | 0.333 | unclassified Clostridiales       | unclassified Clostridiales       | Firmicutes    | Bacteria |
| CAG00567 | 1760 | 0 | 0.333 | Clostridium perfringens          | Clostridium                      | Firmicutes    | Bacteria |
| CAG00577 | 1743 | 0 | 0.333 | Faecalibacterium 3               | Faecalibacterium                 | Firmicutes    | Bacteria |
| CAG00582 | 1738 | 0 | 0.333 | Roseburia inulinivorans          | Roseburia                        | Firmicutes    | Bacteria |
| CAG00612 | 1705 | 0 | 0.333 | Faecalibacterium 2               | Faecalibacterium                 | Firmicutes    | Bacteria |
| CAG00616 | 1701 | 0 | 0.333 | unclassified Ruminococcaceae     | unclassified Ruminococcaceae     | Firmicutes    | Bacteria |
| CAG00619 | 1697 | 0 | 0.333 | unclassified Faecalibacterium    | Faecalibacterium                 | Firmicutes    | Bacteria |
| CAG00783 | 1689 | 0 | 0.333 | unclassified Oscillibacter       | Oscillibacter                    | Firmicutes    | Bacteria |
| CAG00625 | 1687 | 0 | 0.333 | unclassified Firmicutes          | unclassified Firmicutes          | Firmicutes    | Bacteria |
| CAG00633 | 1680 | 0 | 0.333 | unclassified Lachnospiraceae     | unclassified Lachnospiraceae     | Firmicutes    | Bacteria |
| CAG00634 | 1676 | 0 | 0.333 | unclassified Prevotella          | Prevotella                       | Bacteroidetes | Bacteria |
| CAG00636 | 1675 | 0 | 0.333 | unclassified Roseburia           | Roseburia                        | Firmicutes    | Bacteria |
| CAG00639 | 1671 | 0 | 0.333 | Eubacterium sp. CAG:156          | Eubacterium                      | Firmicutes    | Bacteria |
| CAG00644 | 1670 | 0 | 0.333 | Clostridium sp. CAG:226          | unclassified Clostridiales       | Firmicutes    | Bacteria |
| CAG00666 | 1653 | 0 | 0.333 | Clostridium sp. CAG:43           | unclassified Clostridiales       | Firmicutes    | Bacteria |
| CAG00667 | 1653 | 0 | 0.333 | Faecalibacterium 4               | Faecalibacterium                 | Firmicutes    | Bacteria |
| CAG00676 | 1643 | 0 | 0.333 | unclassified Oscillibacter       | Oscillibacter                    | Firmicutes    | Bacteria |

|          |      |   |                                                 |                              |               |              |
|----------|------|---|-------------------------------------------------|------------------------------|---------------|--------------|
| CAG00681 | 1635 | 0 | 0.333 Faecalitalea cylindroides                 | Faecalitalea                 | Firmicutes    | Bacteria     |
| CAG00692 | 1621 | 0 | 0.333 unclassified                              | unclassified                 | unclassified  | unclassified |
| CAG00709 | 1606 | 0 | 0.333 unclassified Firmicutes                   | unclassified Firmicutes      | Firmicutes    | Bacteria     |
| CAG00716 | 1592 | 0 | 0.333 unclassified Firmicutes                   | unclassified Firmicutes      | Firmicutes    | Bacteria     |
| CAG00718 | 1591 | 0 | 0.333 Eubacterium ventriosum                    | Eubacterium                  | Firmicutes    | Bacteria     |
| CAG00720 | 1590 | 0 | 0.333 Anaerotruncus colihominis                 | Anaerotruncus                | Firmicutes    | Bacteria     |
| CAG00722 | 1587 | 0 | 0.333 Acidaminococcus fermentans                | Acidaminococcus              | Firmicutes    | Bacteria     |
| CAG00729 | 1584 | 0 | 0.333 unclassified Oscillibacter                | Oscillibacter                | Firmicutes    | Bacteria     |
| CAG00735 | 1570 | 0 | 0.333 unclassified Eubacterium                  | Eubacterium                  | Firmicutes    | Bacteria     |
| CAG00742 | 1564 | 0 | 0.333 unclassified Fusobacterium                | Fusobacterium                | Fusobacteria  | Bacteria     |
| CAG00751 | 1552 | 0 | 0.333 Firmicutes bacterium CAG:238              | unclassified Firmicutes      | Firmicutes    | Bacteria     |
| CAG00961 | 1550 | 0 | 0.333 unclassified Ruminococcaceae              | unclassified Ruminococcaceae | Firmicutes    | Bacteria     |
| CAG00755 | 1548 | 0 | 0.333 unclassified Faecalibacterium             | Faecalibacterium             | Firmicutes    | Bacteria     |
| CAG00773 | 1519 | 0 | 0.333 unclassified Firmicutes                   | unclassified Firmicutes      | Firmicutes    | Bacteria     |
| CAG00782 | 1500 | 0 | 0.333 Eubacterium rectale                       | Eubacterium                  | Firmicutes    | Bacteria     |
| CAG00791 | 1492 | 0 | 0.333 Clostridium sp. CAG:221 - Clostridium sp. | unclassified Clostridiales   | Firmicutes    | Bacteria     |
| CAG00794 | 1489 | 0 | 0.333 Firmicutes bacterium CAG:536              | unclassified Firmicutes      | Firmicutes    | Bacteria     |
| CAG00805 | 1477 | 0 | 0.333 unclassified Ruminococcaceae              | unclassified Ruminococcaceae | Firmicutes    | Bacteria     |
| CAG00807 | 1474 | 0 | 0.333 unclassified Holdemanella                 | Holdemanella                 | Firmicutes    | Bacteria     |
| CAG00808 | 1471 | 0 | 0.333 unclassified Firmicutes                   | unclassified Firmicutes      | Firmicutes    | Bacteria     |
| CAG00814 | 1464 | 0 | 0.333 Eubacterium sp. CAG:192                   | Eubacterium                  | Firmicutes    | Bacteria     |
| CAG00819 | 1462 | 0 | 0.333 Acidaminococcus sp. CAG:542               | Acidaminococcus              | Firmicutes    | Bacteria     |
| CAG00828 | 1453 | 0 | 0.333 unclassified Oscillibacter                | Oscillibacter                | Firmicutes    | Bacteria     |
| CAG00862 | 1390 | 0 | 0.333 Firmicutes bacterium CAG:129 & uncltu     | unclassified Firmicutes      | Firmicutes    | Bacteria     |
| CAG00869 | 1369 | 0 | 0.333 unclassified Roseburia                    | Roseburia                    | Firmicutes    | Bacteria     |
| CAG00871 | 1362 | 0 | 0.333 unclassified Lachnospiraceae              | unclassified Lachnospiraceae | Firmicutes    | Bacteria     |
| CAG00873 | 1359 | 0 | 0.333 unclassified Butyricimonas                | Butyricimonas                | Bacteroidetes | Bacteria     |
| CAG00880 | 1352 | 0 | 0.333 Subdoligranulum sp. CAG:314               | Subdoligranulum              | Firmicutes    | Bacteria     |
| CAG00890 | 1327 | 0 | 0.333 unclassified Clostridiales                | unclassified Clostridiales   | Firmicutes    | Bacteria     |
| CAG00893 | 1324 | 0 | 0.333 unclassified Clostridiales                | unclassified Clostridiales   | Firmicutes    | Bacteria     |
| CAG00897 | 1319 | 0 | 0.333 Oscillibacter sp.                         | Oscillibacter                | Firmicutes    | Bacteria     |
| CAG00920 | 1280 | 0 | 0.333 unclassified                              | unclassified                 | unclassified  | unclassified |
| CAG00941 | 1240 | 0 | 0.333 unclassified Oscillibacter                | Oscillibacter                | Firmicutes    | Bacteria     |
| CAG00949 | 1224 | 0 | 0.333 Ruminococcaceae bacterium D16             | unclassified Ruminococcaceae | Firmicutes    | Bacteria     |
| CAG00965 | 1210 | 0 | 0.333 unclassified Firmicutes                   | unclassified Firmicutes      | Firmicutes    | Bacteria     |
| CAG00969 | 1208 | 0 | 0.333 Clostridium sp. L2-50                     | unclassified Clostridiales   | Firmicutes    | Bacteria     |
| CAG00974 | 1202 | 0 | 0.333 unclassified Eubacterium                  | Eubacterium                  | Firmicutes    | Bacteria     |
| CAG00987 | 1178 | 0 | 0.333 Megasphaera micronuciformis               | Megasphaera                  | Firmicutes    | Bacteria     |
| CAG01016 | 1138 | 0 | 0.333 unclassified Ruminococcaceae              | unclassified Ruminococcaceae | Firmicutes    | Bacteria     |
| CAG01043 | 1094 | 0 | 0.333 unclassified Firmicutes                   | unclassified Firmicutes      | Firmicutes    | Bacteria     |
| CAG01065 | 1068 | 0 | 0.333 unclassified Lachnospiraceae              | unclassified Lachnospiraceae | Firmicutes    | Bacteria     |
| CAG01070 | 1060 | 0 | 0.333 unclassified Clostridiales                | unclassified Clostridiales   | Firmicutes    | Bacteria     |
| CAG01116 | 999  | 0 | 0.333 unclassified Firmicutes                   | unclassified Firmicutes      | Firmicutes    | Bacteria     |
| CAG01141 | 964  | 0 | 0.333 Holdemanella biformis                     | Holdemanella                 | Firmicutes    | Bacteria     |
| CAG01146 | 956  | 0 | 0.333 unclassified Oscillibacter                | Oscillibacter                | Firmicutes    | Bacteria     |
| CAG01190 | 879  | 0 | 0.333 Butyricimonas virosa                      | Butyricimonas                | Bacteroidetes | Bacteria     |
| CAG01195 | 867  | 0 | 0.333 unclassified Ruminococcaceae              | unclassified Ruminococcaceae | Firmicutes    | Bacteria     |
| CAG01207 | 853  | 0 | 0.333 unclassified Oscillibacter                | Oscillibacter                | Firmicutes    | Bacteria     |
| CAG01217 | 828  | 0 | 0.333 unclassified Clostridiales                | unclassified Clostridiales   | Firmicutes    | Bacteria     |
| CAG01228 | 814  | 0 | 0.333 unclassified Lachnospiraceae              | Lachnospiraceae              | Firmicutes    | Bacteria     |
| CAG01237 | 799  | 0 | 0.333 unclassified Oscillibacter                | Oscillibacter                | Firmicutes    | Bacteria     |
| CAG01238 | 797  | 0 | 0.333 butyrate-producing bacterium SS3/4 - Cl   | unclassified Clostridiales   | Firmicutes    | Bacteria     |

|            |      |   |                                        |                              |                |              |
|------------|------|---|----------------------------------------|------------------------------|----------------|--------------|
| CAG01242   | 789  | 0 | 0.333 unclassified                     | unclassified                 | unclassified   | unclassified |
| CAG01268   | 742  | 0 | 0.333 unclassified Lachnospiraceae     | unclassified Lachnospiraceae | Firmicutes     | Bacteria     |
| CAG01321   | 636  | 0 | 0.333 Faecalibacterium 1               | Faecalibacterium             | Firmicutes     | Bacteria     |
| CAG01327   | 630  | 0 | 0.333 unclassified                     | unclassified                 | unclassified   | unclassified |
| CAG01368   | 570  | 0 | 0.333 unclassified Bacteroidales       | unclassified Bacteroidales   | Bacteroidetes  | Bacteria     |
| CAG01369   | 570  | 0 | 0.333 Roseburia intestinalis           | Roseburia                    | Firmicutes     | Bacteria     |
| CAG01400   | 522  | 0 | 0.333 unclassified Lachnospiraceae     | unclassified Lachnospiraceae | Firmicutes     | Bacteria     |
| CAG01420   | 484  | 0 | 0.333 unclassified Clostridiales       | unclassified Clostridiales   | Firmicutes     | Bacteria     |
| CAG01435   | 456  | 0 | 0.333 unclassified Faecalibacterium    | Faecalibacterium             | Firmicutes     | Bacteria     |
| CAG01540   | 341  | 0 | 0.333 unclassified Clostridiales       | unclassified Clostridiales   | Firmicutes     | Bacteria     |
| CAG01553   | 333  | 0 | 0.333 unclassified Clostridiales       | unclassified Clostridiales   | Firmicutes     | Bacteria     |
| CAG01702   | 248  | 0 | 0.333 Porphyromonas asaccharolytica    | Porphyromonas                | Bacteroidetes  | Bacteria     |
| CAG01775   | 214  | 0 | 0.333 unclassified                     | unclassified                 | unclassified   | unclassified |
| CAG02062   | 147  | 0 | 0.333 unclassified                     | unclassified                 | unclassified   | unclassified |
| CAG02090   | 141  | 0 | 0.333 Anaerotruncus sp. CAG:528        | Anaerotruncus                | Firmicutes     | Bacteria     |
| CAG02437   | 95   | 0 | 0.333 unclassified Lachnospiraceae     | Lachnospiraceae              | Firmicutes     | Bacteria     |
| CAG02742   | 74   | 0 | 0.333 unclassified Firmicutes          | unclassified Firmicutes      | Firmicutes     | Bacteria     |
| CAG03218   | 55   | 0 | 0.333 Clostridium clostridioforme      | Lachnospiraceae              | Firmicutes     | Bacteria     |
| CAG00011   | 5523 | 0 | 0.333 Escherichia coli                 | Escherichia                  | Proteobacteria | Bacteria     |
| CAG00028   | 4343 | 0 | 0.667 Klebsiella oxytoca               | Klebsiella                   | Proteobacteria | Bacteria     |
| CAG00030   | 4179 | 0 | 0.667 Enterobacter aerogenes           | Enterobacter                 | Proteobacteria | Bacteria     |
| CAG00069   | 3167 | 0 | 0.333 Morganella morganii              | Morganella                   | Proteobacteria | Bacteria     |
| CAG00078   | 3084 | 0 | 0.333 Proteus mirabilis                | Proteus                      | Proteobacteria | Bacteria     |
| CAG00104   | 2864 | 0 | 0.333 Enterobacter cloacae 4           | Enterobacter                 | Proteobacteria | Bacteria     |
| CAG00124   | 2742 | 0 | 0.667 Klebsiella variicola             | Klebsiella                   | Proteobacteria | Bacteria     |
| CAG00416   | 1982 | 0 | 0.333 Lelliottia amnigena              | Lelliottia                   | Proteobacteria | Bacteria     |
| CAG00878   | 1352 | 0 | 0.333 Citrobacter koseri               | Citrobacter                  | Proteobacteria | Bacteria     |
| CAG00883   | 1341 | 0 | 0.333 Escherichia coli                 | Escherichia                  | Proteobacteria | Bacteria     |
| CAG01652   | 271  | 0 | 0.333 Escherichia coli                 | Escherichia                  | Proteobacteria | Bacteria     |
| CAG02158   | 128  | 0 | 0.333 Escherichia coli                 | Escherichia                  | Proteobacteria | Bacteria     |
| CAG01022   | 1126 | 0 | 0.333 Haemophilus paraphrohaemolyticus | Haemophilus                  | Proteobacteria | Bacteria     |
| CAG01290   | 688  | 0 | 0.333 Enterobacter cloacae 1           | Enterobacter                 | Proteobacteria | Bacteria     |
| CAG01425   | 475  | 0 | 0.333 Escherichia fergusonii           | Escherichia                  | Proteobacteria | Bacteria     |
| CAG00018_1 | 1509 | 0 | 0.333 Klebsiella oxytoca               | Klebsiella                   | Proteobacteria | Bacteria     |
| CAG01099   | 1016 | 0 | 0.333 Raoultella ornithinolytica       | Raoultella                   | Proteobacteria | Bacteria     |
| CAG02057   | 147  | 0 | 0.333 unclassified                     | unclassified                 | unclassified   | unclassified |
