# Supplementary material for: Human and preclinical studies of the host–gut microbiome co-metabolite hippurate as a marker and mediator of metabolic health
Source: HighWire-hosted journal article supplement (doi:10.1136/gutjnl-2020-323314), 2021-05-11
Supplement: gutjnl-2020-323314supp016_data_supplement.pdf [file gutjnl-2020-323314supp016_data_supplement.pdf]

**Supplementary Table ST.7. Association between the microbiota composition profiled as metagenomic OTUs (mOTUs) and urine hippurate levels.**

| Metabolite | EggNOG                             | Spearman $\rho$ | P        | FDR      |
|------------|------------------------------------|-----------------|----------|----------|
| hippurate  | [Ruminococcus] gnavus              | -0.3775         | 1.31E-10 | 7.24E-08 |
| hippurate  | Clostridium bolteae                | -0.366          | 5.14E-10 | 1.42E-07 |
| hippurate  | motu_linkage_group_327             | 0.3497          | 3.24E-09 | 5.97E-07 |
| hippurate  | motu_linkage_group_307             | 0.3289          | 2.95E-08 | 4.08E-06 |
| hippurate  | Lachnospiraceae bacterium 1_4_56FA | -0.3119         | 1.59E-07 | 1.76E-05 |
| hippurate  | motu_linkage_group_644             | 0.3064          | 2.67E-07 | 2.46E-05 |
| hippurate  | motu_linkage_group_383             | 0.3005          | 4.64E-07 | 3.66E-05 |
| hippurate  | motu_linkage_group_611             | 0.2978          | 5.91E-07 | 4.09E-05 |
| hippurate  | Coprococcus eutactus               | 0.2911          | 1.08E-06 | 6.16E-05 |
| hippurate  | motu_linkage_group_308             | 0.2898          | 1.21E-06 | 6.16E-05 |
| hippurate  | motu_linkage_group_517             | 0.2897          | 1.23E-06 | 6.16E-05 |
| hippurate  | motu_linkage_group_456             | -0.2798         | 2.89E-06 | 0.000128 |
| hippurate  | motu_linkage_group_346             | 0.2794          | 0.000003 | 0.000128 |
| hippurate  | motu_linkage_group_277             | 0.272           | 5.54E-06 | 0.000208 |
| hippurate  | Clostridium symbiosum              | -0.2718         | 5.64E-06 | 0.000208 |
| hippurate  | motu_linkage_group_306             | 0.27            | 6.54E-06 | 0.000226 |
| hippurate  | motu_linkage_group_672             | 0.2674          | 8.09E-06 | 0.000263 |
| hippurate  | motu_linkage_group_460             | 0.2588          | 0.000016 | 0.000492 |
| hippurate  | motu_linkage_group_451             | -0.2566         | 0.000019 | 0.000553 |
| hippurate  | motu_linkage_group_496             | 0.2546          | 2.21E-05 | 0.000611 |
| hippurate  | motu_linkage_group_334             | 0.2513          | 2.85E-05 | 0.000703 |
| hippurate  | motu_linkage_group_113             | 0.2511          | 0.000029 | 0.000703 |
| hippurate  | unclassified Lachnospiraceae       | -0.2503         | 3.07E-05 | 0.000703 |
| hippurate  | motu_linkage_group_434             | 0.2502          | 0.000031 | 0.000703 |
| hippurate  | motu_linkage_group_652             | 0.2499          | 3.18E-05 | 0.000703 |
| hippurate  | Holdemania filiformis              | -0.2469         | 3.96E-05 | 0.000829 |
| hippurate  | motu_linkage_group_691             | 0.2466          | 4.05E-05 | 0.000829 |
| hippurate  | motu_linkage_group_252             | 0.2453          | 4.47E-05 | 0.000863 |
| hippurate  | Clostridium ramosum                | -0.2449         | 0.000046 | 0.000863 |
| hippurate  | Methanobrevibacter smithii         | 0.2447          | 4.68E-05 | 0.000863 |
| hippurate  | motu_linkage_group_470             | 0.2435          | 5.08E-05 | 0.000906 |
| hippurate  | motu_linkage_group_207             | 0.2409          | 6.15E-05 | 0.001061 |
| hippurate  | motu_linkage_group_87              | 0.2405          | 6.33E-05 | 0.001061 |
| hippurate  | motu_linkage_group_686             | 0.2393          | 0.000069 | 0.001122 |
| hippurate  | Clostridiales bacterium 1_7_47FAA  | -0.2368         | 8.27E-05 | 0.001307 |
| hippurate  | motu_linkage_group_241             | 0.2341          | 0.0001   | 0.001536 |
| hippurate  | motu_linkage_group_212             | 0.2334          | 0.000105 | 0.001569 |
| hippurate  | motu_linkage_group_244             | 0.2328          | 0.00011  | 0.001601 |
| hippurate  | motu_linkage_group_504             | 0.2311          | 0.000124 | 0.001758 |
| hippurate  | motu_linkage_group_238             | 0.2302          | 0.000132 | 0.001825 |
| hippurate  | motu_linkage_group_463             | 0.2269          | 0.000165 | 0.002225 |
| hippurate  | motu_linkage_group_525             | 0.2261          | 0.000175 | 0.00225  |
| hippurate  | motu_linkage_group_771             | 0.2258          | 0.000178 | 0.00225  |
| hippurate  | Eubacterium siraeum                | 0.2257          | 0.000179 | 0.00225  |
| hippurate  | motu_linkage_group_651             | 0.2251          | 0.000186 | 0.002286 |
| hippurate  | motu_linkage_group_57              | 0.2233          | 0.00021  | 0.002525 |
| hippurate  | motu_linkage_group_317             | 0.2228          | 0.000218 | 0.002565 |
| hippurate  | motu_linkage_group_604             | 0.222           | 0.00023  | 0.00265  |
| hippurate  | Ruminococcus sp. 5_1_39BFAA        | -0.2215         | 0.000238 | 0.002677 |

|           |                                      |         |          |          |
|-----------|--------------------------------------|---------|----------|----------|
| hippurate | Bacteroides dorei/vulgatus           | -0.2212 | 0.000242 | 0.002677 |
| hippurate | motu_linkage_group_407               | 0.2199  | 0.000264 | 0.002863 |
| hippurate | [Ruminococcus] torques               | -0.2185 | 0.000289 | 0.003031 |
| hippurate | motu_linkage_group_638               | 0.2183  | 0.000293 | 0.003031 |
| hippurate | [Bacteroides] pectinophilus          | 0.2182  | 0.000296 | 0.003031 |
| hippurate | Anaerotruncus colihominis            | -0.2173 | 0.000313 | 0.003147 |
| hippurate | motu_linkage_group_734               | 0.2151  | 0.000362 | 0.003541 |
| hippurate | motu_linkage_group_551               | -0.215  | 0.000365 | 0.003541 |
| hippurate | motu_linkage_group_103               | 0.2125  | 0.000428 | 0.00402  |
| hippurate | Eggerthella lenta                    | -0.2125 | 0.000429 | 0.004021 |
| hippurate | motu_linkage_group_531               | 0.2115  | 0.000457 | 0.004212 |
| hippurate | motu_linkage_group_260               | 0.2101  | 0.0005   | 0.004533 |
| hippurate | motu_linkage_group_376               | 0.2082  | 0.000562 | 0.005013 |
| hippurate | motu_linkage_group_142               | 0.2065  | 0.000624 | 0.005477 |
| hippurate | motu_linkage_group_625               | 0.2052  | 0.000677 | 0.00585  |
| hippurate | motu_linkage_group_72                | 0.2048  | 0.000694 | 0.005904 |
| hippurate | motu_linkage_group_430               | 0.2037  | 0.000744 | 0.006157 |
| hippurate | motu_linkage_group_145               | 0.2036  | 0.000746 | 0.006157 |
| hippurate | motu_linkage_group_124               | 0.2022  | 0.000813 | 0.006612 |
| hippurate | motu_linkage_group_678               | 0.2011  | 0.000872 | 0.006952 |
| hippurate | motu_linkage_group_122               | 0.2009  | 0.00088  | 0.006952 |
| hippurate | Erysipelotrichaceae bacterium 3_1_55 | -0.2006 | 0.000899 | 0.006957 |
| hippurate | motu_linkage_group_565               | 0.2004  | 0.000906 | 0.006957 |
| hippurate | motu_linkage_group_567               | -0.2001 | 0.000926 | 0.006957 |
| hippurate | Butyrivibrio crossotus               | 0.2     | 0.000931 | 0.006957 |
| hippurate | motu_linkage_group_508               | 0.1995  | 0.000958 | 0.007064 |
| hippurate | motu_linkage_group_190               | 0.1988  | 0.001    | 0.007276 |
| hippurate | Collinsella stercoris                | -0.197  | 0.001111 | 0.007969 |
| hippurate | motu_linkage_group_121               | 0.1968  | 0.001124 | 0.007969 |
| hippurate | motu_linkage_group_636               | 0.1955  | 0.001214 | 0.008498 |
| hippurate | motu_linkage_group_219               | 0.195   | 0.001258 | 0.008696 |
| hippurate | Blautia hydrogenotrophica            | -0.1939 | 0.001335 | 0.009114 |
| hippurate | Clostridium scindens                 | -0.1912 | 0.001564 | 0.010547 |
| hippurate | motu_linkage_group_529               | 0.1905  | 0.001634 | 0.01079  |
| hippurate | motu_linkage_group_136               | 0.1904  | 0.001639 | 0.01079  |
| hippurate | motu_linkage_group_600               | 0.1886  | 0.001823 | 0.01186  |
| hippurate | Bacteroides xylanisolvens            | -0.1876 | 0.001925 | 0.012378 |
| hippurate | motu_linkage_group_258               | 0.1872  | 0.001971 | 0.012528 |
| hippurate | motu_linkage_group_243               | 0.1868  | 0.002015 | 0.012662 |
| hippurate | motu_linkage_group_586               | 0.186   | 0.002105 | 0.013045 |
| hippurate | motu_linkage_group_68                | 0.1859  | 0.002123 | 0.013045 |
| hippurate | motu_linkage_group_349               | -0.1856 | 0.002161 | 0.013132 |
| hippurate | Dialister invisus                    | -0.1839 | 0.002365 | 0.014207 |
| hippurate | motu_linkage_group_226               | 0.1836  | 0.002408 | 0.014207 |
| hippurate | motu_linkage_group_85                | 0.1836  | 0.002415 | 0.014207 |
| hippurate | butyrate-producing bacterium         | -0.1825 | 0.002566 | 0.014931 |
| hippurate | motu_linkage_group_490               | -0.1823 | 0.002592 | 0.014931 |
| hippurate | Eubacterium eligens                  | 0.1809  | 0.002797 | 0.015595 |
| hippurate | motu_linkage_group_404               | 0.1808  | 0.002814 | 0.015595 |
| hippurate | motu_linkage_group_566               | 0.1808  | 0.002817 | 0.015595 |
| hippurate | motu_linkage_group_415               | 0.1808  | 0.00282  | 0.015595 |
| hippurate | motu_linkage_group_375               | 0.1802  | 0.002904 | 0.0159   |

|           |                                      |         |          |          |
|-----------|--------------------------------------|---------|----------|----------|
| hippurate | Pseudoflavonifractor capillosus      | -0.1797 | 0.002995 | 0.016238 |
| hippurate | motu_linkage_group_217               | 0.1785  | 0.003193 | 0.017085 |
| hippurate | Anaerostipes caccae                  | -0.1784 | 0.003213 | 0.017085 |
| hippurate | motu_linkage_group_120               | 0.176   | 0.003655 | 0.01925  |
| hippurate | motu_linkage_group_218               | 0.1756  | 0.003723 | 0.019423 |
| hippurate | Erysipelotrichaceae bacterium 5_2_54 | -0.1743 | 0.00399  | 0.020621 |
| hippurate | motu_linkage_group_362               | 0.1738  | 0.0041   | 0.020994 |
| hippurate | motu_linkage_group_20                | 0.1729  | 0.004314 | 0.021788 |
| hippurate | motu_linkage_group_281               | -0.1728 | 0.004334 | 0.021788 |
| hippurate | motu_linkage_group_324               | 0.1715  | 0.004648 | 0.022994 |
| hippurate | motu_linkage_group_485               | 0.1714  | 0.004657 | 0.022994 |
| hippurate | motu_linkage_group_509               | 0.1704  | 0.004909 | 0.024024 |
| hippurate | Turicibacter sanguinis               | 0.1699  | 0.005029 | 0.024395 |
| hippurate | Campylobacter hominis                | 0.1687  | 0.005371 | 0.025828 |
| hippurate | Victivallis vadensis                 | 0.1684  | 0.005436 | 0.025915 |
| hippurate | motu_linkage_group_622               | 0.1676  | 0.005673 | 0.026675 |
| hippurate | motu_linkage_group_54                | 0.1675  | 0.005692 | 0.026675 |
| hippurate | motu_linkage_group_548               | 0.1666  | 0.005985 | 0.027813 |
| hippurate | motu_linkage_group_320               | 0.163   | 0.007179 | 0.033083 |
| hippurate | Eubacterium dolichum                 | -0.162  | 0.007533 | 0.034428 |
| hippurate | Bacteroides thetaiotaomicron         | -0.1606 | 0.008076 | 0.036607 |
| hippurate | motu_linkage_group_386               | 0.1598  | 0.008396 | 0.037748 |
| hippurate | Clostridium sp. HGF2                 | -0.1592 | 0.008668 | 0.038592 |
| hippurate | Eubacterium cylindroides             | 0.159   | 0.008732 | 0.038592 |
| hippurate | motu_linkage_group_624               | -0.1588 | 0.008835 | 0.038592 |
| hippurate | motu_linkage_group_288               | 0.1587  | 0.008863 | 0.038592 |
| hippurate | motu_linkage_group_411               | 0.1571  | 0.009584 | 0.041406 |
| hippurate | motu_linkage_group_224               | 0.1551  | 0.010571 | 0.045316 |
| hippurate | motu_linkage_group_450               | -0.1542 | 0.011024 | 0.046894 |
| hippurate | motu_linkage_group_102               | 0.154   | 0.011133 | 0.046997 |
| hippurate | motu_linkage_group_164               | 0.1529  | 0.011721 | 0.049104 |
| hippurate | motu_linkage_group_257               | 0.1526  | 0.011905 | 0.0495   |
| hippurate | motu_linkage_group_282               | 0.1513  | 0.012657 | 0.052234 |
| hippurate | motu_linkage_group_385               | 0.1499  | 0.013474 | 0.054975 |
| hippurate | motu_linkage_group_486               | 0.1499  | 0.01352  | 0.054975 |
| hippurate | motu_linkage_group_176               | -0.1486 | 0.014367 | 0.057992 |
| hippurate | motu_linkage_group_248               | 0.1483  | 0.014547 | 0.058293 |
| hippurate | motu_linkage_group_342               | 0.1478  | 0.014864 | 0.059135 |
| hippurate | Ruminococcaceae bacterium D16        | -0.1465 | 0.01581  | 0.062026 |
| hippurate | motu_linkage_group_325               | 0.1465  | 0.015815 | 0.062026 |
| hippurate | Tropheryma whipplei                  | -0.1458 | 0.016319 | 0.063552 |
| hippurate | motu_linkage_group_151               | 0.1454  | 0.016613 | 0.064245 |
| hippurate | motu_linkage_group_45                | 0.1451  | 0.016864 | 0.064762 |
| hippurate | Granulicatella adiacens              | -0.1448 | 0.017066 | 0.064784 |
| hippurate | motu_linkage_group_621               | 0.1448  | 0.017104 | 0.064784 |
| hippurate | motu_linkage_group_712               | 0.1445  | 0.017295 | 0.065062 |
| hippurate | motu_linkage_group_74                | 0.1442  | 0.017523 | 0.065474 |
| hippurate | motu_linkage_group_127               | 0.1431  | 0.018387 | 0.067982 |
| hippurate | motu_linkage_group_51                | 0.1431  | 0.01844  | 0.067982 |
| hippurate | Acidaminococcus fermentans           | 0.1413  | 0.019949 | 0.073058 |
| hippurate | motu_linkage_group_25                | 0.1408  | 0.020419 | 0.074275 |
| hippurate | motu_linkage_group_431               | 0.1406  | 0.02055  | 0.074275 |

|           |                                         |         |          |          |
|-----------|-----------------------------------------|---------|----------|----------|
| hippurate | motu_linkage_group_457                  | 0.1369  | 0.024197 | 0.086889 |
| hippurate | motu_linkage_group_341                  | 0.1356  | 0.025565 | 0.091209 |
| hippurate | <i>Streptococcus parasanguinis</i>      | 0.1349  | 0.026325 | 0.093319 |
| hippurate | butyrate-producing bacterium SS3/4      | -0.134  | 0.027417 | 0.096571 |
| hippurate | <i>Eubacterium bifforme</i>             | 0.1331  | 0.028491 | 0.099719 |
| hippurate | motu_linkage_group_177                  | 0.1328  | 0.028793 | 0.100142 |
| hippurate | <i>Streptococcus</i> sp. C150           | 0.1324  | 0.02927  | 0.101164 |
| hippurate | <i>Roseburia hominis</i>                | 0.1309  | 0.031271 | 0.107409 |
| hippurate | <i>Methanosphaera stadtmanae</i>        | 0.1299  | 0.032593 | 0.111259 |
| hippurate | motu_linkage_group_270                  | 0.129   | 0.033763 | 0.114546 |
| hippurate | <i>Bifidobacterium angulatum</i>        | 0.1287  | 0.034175 | 0.115236 |
| hippurate | motu_linkage_group_192                  | -0.1284 | 0.034555 | 0.115812 |
| hippurate | motu_linkage_group_765                  | -0.1275 | 0.035996 | 0.119637 |
| hippurate | <i>Streptococcus salivarius</i>         | 0.1274  | 0.036129 | 0.119637 |
| hippurate | <i>Oribacterium sinus</i>               | 0.1258  | 0.038563 | 0.126937 |
| hippurate | motu_linkage_group_389                  | 0.1239  | 0.041503 | 0.135391 |
| hippurate | <i>Clostridium spiroforme</i>           | -0.1237 | 0.041857 | 0.135391 |
| hippurate | motu_linkage_group_559                  | 0.1237  | 0.041866 | 0.135391 |
| hippurate | motu_linkage_group_10                   | 0.123   | 0.043074 | 0.138488 |
| hippurate | motu_linkage_group_480                  | 0.1223  | 0.044236 | 0.141402 |
| hippurate | <i>Rothia mucilaginosa</i>              | 0.122   | 0.044789 | 0.142347 |
| hippurate | <i>Staphylococcus aureus</i>            | -0.1216 | 0.045493 | 0.143758 |
| hippurate | <i>Clostridium</i> sp. L2-50            | 0.1215  | 0.045758 | 0.143774 |
| hippurate | <i>Clostridium saccharolyticum</i>      | -0.1212 | 0.046215 | 0.144389 |
| hippurate | motu_linkage_group_634                  | 0.121   | 0.04657  | 0.144681 |
| hippurate | <i>Ruminococcus bromii</i>              | 0.1205  | 0.047446 | 0.146158 |
| hippurate | motu_linkage_group_703                  | 0.1205  | 0.047574 | 0.146158 |
| hippurate | motu_linkage_group_286                  | -0.12   | 0.048387 | 0.147834 |
| hippurate | <i>Aggregatibacter segnis</i>           | -0.1193 | 0.049776 | 0.150489 |
| hippurate | <i>Blautia hansenii</i>                 | -0.1193 | 0.0498   | 0.150489 |
| hippurate | motu_linkage_group_179                  | 0.1189  | 0.050602 | 0.152081 |
| hippurate | motu_linkage_group_592                  | 0.1186  | 0.051133 | 0.152081 |
| hippurate | motu_linkage_group_52                   | 0.1186  | 0.051205 | 0.152081 |
| hippurate | motu_linkage_group_209                  | 0.1185  | 0.05144  | 0.152081 |
| hippurate | <i>Prevotella copri</i>                 | 0.1183  | 0.051702 | 0.152081 |
| hippurate | motu_linkage_group_499                  | 0.1145  | 0.059758 | 0.174847 |
| hippurate | <i>Lactobacillus salivarius</i>         | 0.1143  | 0.060164 | 0.175109 |
| hippurate | <i>Gemella morbillorum</i>              | -0.114  | 0.060992 | 0.176589 |
| hippurate | <i>Lactobacillus casei</i>              | 0.1136  | 0.061902 | 0.178291 |
| hippurate | motu_linkage_group_14                   | 0.1128  | 0.063784 | 0.182759 |
| hippurate | <i>Subdoligranulum variabile</i>        | 0.1125  | 0.064375 | 0.183502 |
| hippurate | <i>Parvimonas micra</i>                 | -0.1119 | 0.065899 | 0.186883 |
| hippurate | motu_linkage_group_301                  | 0.1102  | 0.070104 | 0.197793 |
| hippurate | motu_linkage_group_42                   | -0.1097 | 0.071446 | 0.200557 |
| hippurate | motu_linkage_group_161                  | 0.1094  | 0.07221  | 0.201677 |
| hippurate | [ <i>Ruminococcus</i> ] <i>obeum</i>    | 0.1091  | 0.07293  | 0.202665 |
| hippurate | <i>Salmonella enterica</i>              | -0.1084 | 0.074721 | 0.205763 |
| hippurate | <i>Streptococcus mutans</i>             | 0.1084  | 0.074789 | 0.205763 |
| hippurate | motu_linkage_group_111                  | 0.1081  | 0.075565 | 0.206869 |
| hippurate | motu_linkage_group_18                   | 0.1076  | 0.077055 | 0.209908 |
| hippurate | motu_linkage_group_348                  | 0.1072  | 0.078115 | 0.211753 |
| hippurate | <i>Streptococcus</i> sp. oral taxon 071 | -0.1066 | 0.079871 | 0.215055 |

|           |                                           |         |          |          |
|-----------|-------------------------------------------|---------|----------|----------|
| hippurate | <i>Clostridium methylpentosum</i>         | -0.1065 | 0.080111 | 0.215055 |
| hippurate | motu_linkage_group_38                     | 0.1063  | 0.080611 | 0.215352 |
| hippurate | <i>Streptococcus constellatus</i>         | -0.1058 | 0.082149 | 0.218406 |
| hippurate | motu_linkage_group_448                    | 0.1051  | 0.084155 | 0.222668 |
| hippurate | motu_linkage_group_471                    | 0.1049  | 0.08474  | 0.223149 |
| hippurate | <i>Mitsuokella multacida</i>              | 0.1046  | 0.085695 | 0.224594 |
| hippurate | <i>Bulleidia extructa</i>                 | -0.1043 | 0.08655  | 0.225765 |
| hippurate | <i>Clostridium hylemonae</i>              | -0.1035 | 0.089142 | 0.23096  |
| hippurate | <i>Bacteroides uniformis</i>              | -0.1034 | 0.089377 | 0.23096  |
| hippurate | motu_linkage_group_373                    | -0.1029 | 0.090973 | 0.233991 |
| hippurate | <i>Catonella morbi</i>                    | -0.1019 | 0.094082 | 0.240867 |
| hippurate | <i>Parabacteroides distasonis</i>         | -0.1018 | 0.094564 | 0.240986 |
| hippurate | <i>Enterobacter asburiae</i>              | 0.1011  | 0.096633 | 0.245129 |
| hippurate | motu_linkage_group_33                     | 0.1008  | 0.097881 | 0.247161 |
| hippurate | motu_linkage_group_510                    | 0.1     | 0.10053  | 0.250773 |
| hippurate | motu_linkage_group_445                    | 0.1     | 0.100591 | 0.250773 |
| hippurate | motu_linkage_group_574                    | 0.0999  | 0.100672 | 0.250773 |
| hippurate | motu_linkage_group_443                    | -0.0994 | 0.102604 | 0.25444  |
| hippurate | <i>Lachnospiraceae bacterium 3_1_57FA</i> | -0.0992 | 0.103149 | 0.254649 |
| hippurate | <i>Haemophilus parainfluenzae</i>         | 0.0988  | 0.104504 | 0.25599  |
| hippurate | <i>Fusobacterium nucleatum</i>            | -0.0988 | 0.104618 | 0.25599  |
| hippurate | motu_linkage_group_837                    | 0.0985  | 0.105678 | 0.257445 |
| hippurate | <i>Enterobacter hormaechei/cloacae</i>    | 0.0977  | 0.108469 | 0.262732 |
| hippurate | motu_linkage_group_613                    | 0.0973  | 0.109987 | 0.262732 |
| hippurate | <i>Neisseria subflava</i>                 | -0.0972 | 0.110224 | 0.262732 |
| hippurate | <i>Prevotella tannerae</i>                | -0.0972 | 0.110224 | 0.262732 |
| hippurate | <i>Selenomonas noxia</i>                  | -0.0972 | 0.110224 | 0.262732 |
| hippurate | <i>Olsenella uli</i>                      | 0.097   | 0.111137 | 0.263772 |
| hippurate | motu_linkage_group_366                    | 0.0968  | 0.111936 | 0.263993 |
| hippurate | <i>Escherichia coli</i>                   | -0.0967 | 0.112185 | 0.263993 |
| hippurate | <i>Streptococcus australis</i>            | 0.0963  | 0.113628 | 0.266255 |
| hippurate | <i>Roseburia inulinivorans</i>            | -0.0957 | 0.115849 | 0.270314 |
| hippurate | motu_linkage_group_71                     | 0.0953  | 0.11771  | 0.272751 |
| hippurate | motu_linkage_group_378                    | -0.0951 | 0.118298 | 0.272751 |
| hippurate | motu_linkage_group_528                    | 0.0951  | 0.118373 | 0.272751 |
| hippurate | <i>Prevotella multisaccharivorax</i>      | 0.0949  | 0.119072 | 0.273223 |
| hippurate | <i>Ruminococcus lactaris</i>              | 0.0943  | 0.121576 | 0.277003 |
| hippurate | motu_linkage_group_205                    | 0.0942  | 0.121721 | 0.277003 |
| hippurate | <i>[Clostridium] bartlettii</i>           | 0.0927  | 0.127773 | 0.289584 |
| hippurate | motu_linkage_group_534                    | 0.092   | 0.131027 | 0.295747 |
| hippurate | <i>Acidaminococcus intestini</i>          | -0.0909 | 0.135643 | 0.303722 |
| hippurate | motu_linkage_group_617                    | 0.0908  | 0.13613  | 0.303722 |
| hippurate | <i>Bacteroides fragilis</i>               | -0.0907 | 0.136208 | 0.303722 |
| hippurate | <i>Lactobacillus crispatus</i>            | -0.0902 | 0.13842  | 0.306185 |
| hippurate | <i>Prevotella melaninogenica</i>          | -0.0902 | 0.13842  | 0.306185 |
| hippurate | motu_linkage_group_360                    | 0.0897  | 0.140679 | 0.309942 |
| hippurate | motu_linkage_group_26                     | 0.0893  | 0.142374 | 0.312126 |
| hippurate | motu_linkage_group_185                    | 0.0893  | 0.142799 | 0.312126 |
| hippurate | motu_linkage_group_168                    | 0.0884  | 0.146719 | 0.31796  |
| hippurate | <i>Streptococcus mitis</i>                | 0.0883  | 0.147265 | 0.31796  |
| hippurate | <i>Bilophila wadsworthia</i>              | -0.0883 | 0.14729  | 0.31796  |
| hippurate | motu_linkage_group_3                      | 0.088   | 0.148556 | 0.31796  |



|           |                                      |         |          |          |
|-----------|--------------------------------------|---------|----------|----------|
| hippurate | motu_linkage_group_280               | 0.088   | 0.148641 | 0.31796  |
| hippurate | <i>Fusobacterium ulcerans</i>        | -0.0879 | 0.148956 | 0.31796  |
| hippurate | <i>Ruminococcus champanellensis</i>  | 0.0878  | 0.149493 | 0.31796  |
| hippurate | <i>Streptococcus pneumoniae</i>      | 0.0876  | 0.150207 | 0.318255 |
| hippurate | <i>Lactobacillus sakei</i>           | -0.0874 | 0.151426 | 0.318757 |
| hippurate | <i>Prevotella buccae</i>             | -0.0873 | 0.151597 | 0.318757 |
| hippurate | motu_linkage_group_194               | -0.0871 | 0.152953 | 0.32039  |
| hippurate | <i>Peptostreptococcus anaerobius</i> | 0.0865  | 0.155481 | 0.324457 |
| hippurate | motu_linkage_group_562               | 0.0859  | 0.158319 | 0.329137 |
| hippurate | motu_linkage_group_211               | 0.0852  | 0.161812 | 0.335139 |
| hippurate | <i>Bacteroides ovatus</i>            | -0.0848 | 0.164097 | 0.338337 |
| hippurate | <i>Clostridium</i> sp. 7_2_43FAA     | 0.0847  | 0.16458  | 0.338337 |
| hippurate | motu_linkage_group_398               | 0.0841  | 0.167405 | 0.34287  |
| hippurate | motu_linkage_group_314               | 0.0837  | 0.169652 | 0.34619  |
| hippurate | <i>Streptococcus thermophilus</i>    | 0.0831  | 0.172455 | 0.350393 |
| hippurate | <i>Campylobacter concisus</i>        | -0.083  | 0.172979 | 0.350393 |
| hippurate | <i>Prevotella dentalis</i>           | 0.082   | 0.178524 | 0.360306 |
| hippurate | <i>Weissella cibaria</i>             | -0.0812 | 0.18259  | 0.366249 |
| hippurate | <i>Coprococcus catus</i>             | 0.0811  | 0.183047 | 0.366249 |
| hippurate | <i>Slackia exigua</i>                | -0.081  | 0.183633 | 0.366249 |
| hippurate | <i>Prevotella oralis</i>             | -0.0809 | 0.184215 | 0.366249 |
| hippurate | motu_linkage_group_295               | 0.0808  | 0.18478  | 0.366249 |
| hippurate | <i>Proteus mirabilis</i>             | -0.0806 | 0.186011 | 0.367372 |
| hippurate | <i>Paraprevotella xylaniphila</i>    | -0.0804 | 0.186771 | 0.36756  |
| hippurate | <i>Lactobacillus ruminis</i>         | 0.0796  | 0.191252 | 0.375044 |
| hippurate | <i>Fusobacterium mortiferum</i>      | -0.0793 | 0.192824 | 0.376359 |
| hippurate | <i>Bacteroides coprocola</i>         | 0.0793  | 0.193284 | 0.376359 |
| hippurate | motu_linkage_group_333               | 0.0791  | 0.194059 | 0.376543 |
| hippurate | <i>Enterococcus casseliflavus</i>    | 0.0778  | 0.201724 | 0.388504 |
| hippurate | <i>Streptococcus anginosus</i>       | 0.0777  | 0.201976 | 0.388504 |
| hippurate | motu_linkage_group_65                | 0.0777  | 0.202331 | 0.388504 |
| hippurate | <i>Prevotella bivia</i>              | -0.0774 | 0.204013 | 0.390378 |
| hippurate | <i>Oxalobacter formigenes</i>        | 0.0773  | 0.20487  | 0.390666 |
| hippurate | motu_linkage_group_532               | 0.077   | 0.2064   | 0.392231 |
| hippurate | <i>Porphyromonas asaccharolytica</i> | 0.0768  | 0.207798 | 0.393535 |
| hippurate | <i>Enterococcus faecium</i>          | 0.0763  | 0.210301 | 0.396916 |
| hippurate | motu_linkage_group_240               | 0.0762  | 0.211182 | 0.397223 |
| hippurate | <i>Marvinbryantia formatexigens</i>  | -0.076  | 0.212525 | 0.398394 |
| hippurate | <i>Bifidobacterium dentium</i>       | 0.0757  | 0.213938 | 0.399688 |
| hippurate | <i>Streptococcus sanguinis</i>       | 0.0752  | 0.217494 | 0.404964 |
| hippurate | motu_linkage_group_786               | -0.0748 | 0.219659 | 0.406742 |
| hippurate | <i>Aggregatibacter aphrophilus</i>   | -0.0748 | 0.21992  | 0.406742 |
| hippurate | motu_linkage_group_131               | -0.0745 | 0.221561 | 0.408411 |
| hippurate | <i>Lactobacillus delbrueckii</i>     | 0.0742  | 0.223446 | 0.410517 |
| hippurate | <i>Bacteroides coprophilus</i>       | 0.074   | 0.224928 | 0.411144 |
| hippurate | motu_linkage_group_474               | 0.0739  | 0.225274 | 0.411144 |
| hippurate | motu_linkage_group_182               | 0.0733  | 0.229159 | 0.414703 |
| hippurate | <i>Gemella sanguinis</i>             | 0.0733  | 0.229259 | 0.414703 |
| hippurate | motu_linkage_group_488               | 0.0732  | 0.229474 | 0.414703 |
| hippurate | <i>Lactococcus garvieae</i>          | -0.0723 | 0.235209 | 0.423683 |
| hippurate | <i>Bacteroides eggerthii</i>         | 0.0721  | 0.236729 | 0.425036 |
| hippurate | <i>Veillonella atypica</i>           | 0.0717  | 0.239459 | 0.428546 |

|           |                                         |         |          |          |
|-----------|-----------------------------------------|---------|----------|----------|
| hippurate | <i>Enterobacter cancerogenus</i>        | 0.0715  | 0.240998 | 0.429409 |
| hippurate | motu_linkage_group_573                  | 0.0714  | 0.241494 | 0.429409 |
| hippurate | <i>Faecalibacterium prausnitzii</i>     | -0.0712 | 0.242635 | 0.430055 |
| hippurate | motu_linkage_group_662                  | 0.0709  | 0.244561 | 0.432084 |
| hippurate | <i>Eubacterium ventriosum</i>           | 0.0707  | 0.246398 | 0.433943 |
| hippurate | motu_linkage_group_297                  | 0.0701  | 0.250361 | 0.439523 |
| hippurate | motu_linkage_group_414                  | -0.0698 | 0.252377 | 0.441554 |
| hippurate | motu_linkage_group_117                  | 0.0697  | 0.253115 | 0.441554 |
| hippurate | <i>Arcobacter butzleri</i>              | -0.0692 | 0.256013 | 0.442492 |
| hippurate | <i>Desulfovibrio vulgaris</i>           | -0.0692 | 0.256013 | 0.442492 |
| hippurate | motu_linkage_group_289                  | 0.0692  | 0.256053 | 0.442492 |
| hippurate | <i>Prevotella buccalis</i>              | 0.0689  | 0.258069 | 0.44335  |
| hippurate | <i>Ruminococcus</i> sp. SR1/5           | -0.0689 | 0.258153 | 0.44335  |
| hippurate | <i>Dorea formicigenerans</i>            | -0.0687 | 0.259818 | 0.444828 |
| hippurate | <i>Bifidobacterium breve</i>            | -0.0685 | 0.260785 | 0.445105 |
| hippurate | motu_linkage_group_519                  | 0.0681  | 0.264258 | 0.449645 |
| hippurate | <i>Parasutterella excrementihominis</i> | 0.0677  | 0.266682 | 0.452173 |
| hippurate | <i>Enterococcus faecalis</i>            | 0.0676  | 0.267379 | 0.452173 |
| hippurate | <i>Atopobium parvulum</i>               | 0.0673  | 0.269238 | 0.453929 |
| hippurate | <i>Veillonella dispar</i>               | 0.0661  | 0.278497 | 0.468112 |
| hippurate | <i>Fusobacterium gonidiaformans</i>     | -0.0659 | 0.280006 | 0.469222 |
| hippurate | motu_linkage_group_273                  | 0.0657  | 0.280925 | 0.46934  |
| hippurate | motu_linkage_group_4                    | 0.0656  | 0.282015 | 0.469742 |
| hippurate | <i>Shuttleworthia satellites</i>        | -0.0645 | 0.290213 | 0.481945 |
| hippurate | motu_linkage_group_552                  | -0.0639 | 0.294264 | 0.48721  |
| hippurate | motu_linkage_group_797                  | 0.0636  | 0.297132 | 0.488921 |
| hippurate | motu_linkage_group_228                  | -0.0635 | 0.297661 | 0.488921 |
| hippurate | motu_linkage_group_135                  | -0.0635 | 0.29795  | 0.488921 |
| hippurate | motu_linkage_group_63                   | 0.062   | 0.309103 | 0.505722 |
| hippurate | <i>Haemophilus influenzae</i>           | -0.0616 | 0.312346 | 0.508646 |
| hippurate | motu_linkage_group_394                  | 0.0615  | 0.31273  | 0.508646 |
| hippurate | motu_linkage_group_171                  | 0.0611  | 0.31657  | 0.512411 |
| hippurate | motu_linkage_group_666                  | 0.061   | 0.316898 | 0.512411 |
| hippurate | motu_linkage_group_118                  | -0.0607 | 0.319405 | 0.513695 |
| hippurate | <i>Prevotella disiens</i>               | 0.0607  | 0.31955  | 0.513695 |
| hippurate | <i>Citrobacter youngae</i>              | -0.0604 | 0.32189  | 0.515957 |
| hippurate | motu_linkage_group_502                  | 0.0598  | 0.32681  | 0.522191 |
| hippurate | motu_linkage_group_267                  | 0.0597  | 0.327668 | 0.522191 |
| hippurate | <i>Anaerococcus lactolyticus</i>        | -0.0591 | 0.332228 | 0.523425 |
| hippurate | <i>Brevibacterium linens</i>            | -0.0591 | 0.332228 | 0.523425 |
| hippurate | <i>Parvimonas</i> sp. oral taxon 393    | -0.0591 | 0.332228 | 0.523425 |
| hippurate | motu_linkage_group_731                  | -0.0591 | 0.332228 | 0.523425 |
| hippurate | motu_linkage_group_195                  | 0.0588  | 0.334573 | 0.525622 |
| hippurate | motu_linkage_group_230                  | 0.0584  | 0.337974 | 0.527185 |
| hippurate | <i>Pyramidobacter piscolens</i>         | 0.0583  | 0.33864  | 0.527185 |
| hippurate | <i>Bacteroides clarus</i>               | 0.0583  | 0.338866 | 0.527185 |
| hippurate | motu_linkage_group_49                   | 0.0582  | 0.33945  | 0.527185 |
| hippurate | <i>Leuconostoc mesenteroides</i>        | -0.0581 | 0.340696 | 0.527185 |
| hippurate | motu_linkage_group_495                  | 0.058   | 0.341408 | 0.527185 |
| hippurate | <i>Desulfovibrio desulfuricans</i>      | -0.0579 | 0.342241 | 0.527185 |
| hippurate | <i>Acinetobacter baumannii</i>          | 0.0576  | 0.345131 | 0.53016  |
| hippurate | <i>Oscillibacter valericigenes</i>      | 0.0572  | 0.347821 | 0.532812 |

|           |                                     |         |          |          |
|-----------|-------------------------------------|---------|----------|----------|
| hippurate | Leuconostoc citreum                 | -0.0568 | 0.3517   | 0.537265 |
| hippurate | motu_linkage_group_458              | 0.0562  | 0.356798 | 0.540189 |
| hippurate | Collinsella aerofaciens             | 0.0562  | 0.356831 | 0.540189 |
| hippurate | motu_linkage_group_234              | 0.0561  | 0.357509 | 0.540189 |
| hippurate | Fingoldia magna                     | 0.0561  | 0.357521 | 0.540189 |
| hippurate | Alistipes shahii                    | 0.0559  | 0.359361 | 0.541489 |
| hippurate | motu_linkage_group_47               | 0.0552  | 0.364944 | 0.547113 |
| hippurate | Streptococcus sp. M143              | -0.0552 | 0.365072 | 0.547113 |
| hippurate | motu_linkage_group_28               | -0.0546 | 0.370505 | 0.553755 |
| hippurate | motu_linkage_group_585              | 0.0545  | 0.371889 | 0.554325 |
| hippurate | Streptococcus infantis              | -0.0535 | 0.380369 | 0.564444 |
| hippurate | Thermus scotoductus                 | -0.0535 | 0.380719 | 0.564444 |
| hippurate | motu_linkage_group_646              | -0.0518 | 0.395243 | 0.58441  |
| hippurate | Anaerococcus vaginalis              | 0.0513  | 0.39986  | 0.589083 |
| hippurate | unclassified Fusobacterium          | -0.0512 | 0.401425 | 0.589083 |
| hippurate | Enterobacteriaceae bacterium 9_2_54 | 0.0512  | 0.401599 | 0.589083 |
| hippurate | Slackia heliotrinireducens          | -0.0506 | 0.407049 | 0.594491 |
| hippurate | Klebsiella oxytoca                  | 0.0505  | 0.407436 | 0.594491 |
| hippurate | motu_linkage_group_357              | -0.0499 | 0.412826 | 0.598212 |
| hippurate | Escherichia albertii                | 0.0499  | 0.41307  | 0.598212 |
| hippurate | Bifidobacterium longum              | 0.0498  | 0.41407  | 0.598212 |
| hippurate | Lactobacillus rhamnosus             | 0.0498  | 0.414313 | 0.598212 |
| hippurate | Streptococcus peroris               | -0.0495 | 0.416835 | 0.599952 |
| hippurate | motu_linkage_group_254              | 0.0494  | 0.417688 | 0.599952 |
| hippurate | Enterobacter aerogenes              | -0.0491 | 0.420433 | 0.60233  |
| hippurate | Clostridium leptum                  | -0.0481 | 0.429862 | 0.614247 |
| hippurate | motu_linkage_group_521              | 0.0476  | 0.435002 | 0.617994 |
| hippurate | Streptococcus gordonii              | 0.0475  | 0.435893 | 0.617994 |
| hippurate | Streptococcus downei                | 0.0475  | 0.436558 | 0.617994 |
| hippurate | Atopobium rimae                     | 0.0473  | 0.437772 | 0.617994 |
| hippurate | Solobacterium moorei                | -0.0473 | 0.438072 | 0.617994 |
| hippurate | Bacteroides finegoldii              | 0.0471  | 0.439608 | 0.618583 |
| hippurate | Odoribacter splanchnicus            | -0.0468 | 0.443356 | 0.622274 |
| hippurate | motu_linkage_group_391              | -0.0464 | 0.447022 | 0.62307  |
| hippurate | motu_linkage_group_225              | 0.0462  | 0.448676 | 0.62307  |
| hippurate | motu_linkage_group_491              | -0.0462 | 0.449028 | 0.62307  |
| hippurate | motu_linkage_group_24               | 0.0461  | 0.450138 | 0.62307  |
| hippurate | motu_linkage_group_154              | 0.046   | 0.450291 | 0.62307  |
| hippurate | Pseudoalteromonas haloplanktis      | 0.0459  | 0.451761 | 0.62307  |
| hippurate | Bifidobacterium catenulatum-Bifidob | -0.0459 | 0.45181  | 0.62307  |
| hippurate | Leuconostoc gelidum                 | 0.0451  | 0.459473 | 0.632061 |
| hippurate | motu_linkage_group_265              | 0.0446  | 0.464479 | 0.637362 |
| hippurate | motu_linkage_group_344              | 0.0443  | 0.467763 | 0.64028  |
| hippurate | motu_linkage_group_69               | 0.0438  | 0.472562 | 0.645251 |
| hippurate | Delftia acidovorans                 | -0.0436 | 0.475114 | 0.646884 |
| hippurate | motu_linkage_group_345              | 0.0435  | 0.476097 | 0.646884 |
| hippurate | motu_linkage_group_204              | 0.0433  | 0.477636 | 0.647384 |
| hippurate | motu_linkage_group_696              | 0.0427  | 0.483652 | 0.653935 |
| hippurate | Gardnerella vaginalis               | -0.0426 | 0.485083 | 0.654207 |
| hippurate | motu_linkage_group_439              | -0.0424 | 0.48664  | 0.654207 |
| hippurate | Anaerofustis stercorihominis        | -0.0424 | 0.487402 | 0.654207 |
| hippurate | motu_linkage_group_484              | 0.0418  | 0.492866 | 0.659939 |



|           |                                     |         |          |          |
|-----------|-------------------------------------|---------|----------|----------|
| hippurate | motu_linkage_group_210              | 0.0415  | 0.496206 | 0.662807 |
| hippurate | motu_linkage_group_115              | -0.0414 | 0.497667 | 0.663156 |
| hippurate | Granulicatella elegans              | 0.0412  | 0.499111 | 0.663482 |
| hippurate | motu_linkage_group_29               | 0.0408  | 0.503698 | 0.667005 |
| hippurate | motu_linkage_group_284              | 0.0407  | 0.504174 | 0.667005 |
| hippurate | Collinsella intestinalis            | -0.0404 | 0.50762  | 0.669961 |
| hippurate | motu_linkage_group_101              | 0.0399  | 0.51267  | 0.675016 |
| hippurate | Actinomyces sp. oral taxon 170      | 0.0397  | 0.515457 | 0.677073 |
| hippurate | motu_linkage_group_588              | -0.0395 | 0.51709  | 0.677608 |
| hippurate | Haemophilus haemolyticus            | -0.0387 | 0.526205 | 0.687923 |
| hippurate | motu_linkage_group_481              | 0.0383  | 0.529978 | 0.691221 |
| hippurate | Bacteroides plebeius                | 0.0379  | 0.534366 | 0.691847 |
| hippurate | Peptoniphilus harei                 | -0.0379 | 0.534776 | 0.691847 |
| hippurate | motu_linkage_group_363              | 0.0378  | 0.535966 | 0.691847 |
| hippurate | Streptococcus oralis                | 0.0376  | 0.537232 | 0.691847 |
| hippurate | motu_linkage_group_206              | -0.0376 | 0.537475 | 0.691847 |
| hippurate | Lactobacillus gasseri               | 0.0376  | 0.537964 | 0.691847 |
| hippurate | Prevotella denticola                | -0.0373 | 0.540485 | 0.692488 |
| hippurate | motu_linkage_group_159              | 0.0373  | 0.540967 | 0.692488 |
| hippurate | motu_linkage_group_293              | -0.0368 | 0.546095 | 0.697438 |
| hippurate | Desulfovibrio piger                 | 0.0364  | 0.550716 | 0.701719 |
| hippurate | Clostridium butyricum               | -0.0362 | 0.55298  | 0.702122 |
| hippurate | Fusobacterium periodonticum         | -0.0361 | 0.553572 | 0.702122 |
| hippurate | Treponema succinifaciens            | -0.0358 | 0.5575   | 0.705486 |
| hippurate | Capnocytophaga sp. oral taxon 329   | 0.0356  | 0.559946 | 0.706964 |
| hippurate | Phascolarctobacterium succinatutens | 0.0353  | 0.562883 | 0.709053 |
| hippurate | Rothia dentocariosa                 | 0.035   | 0.566103 | 0.711489 |
| hippurate | motu_linkage_group_246              | -0.0345 | 0.571317 | 0.716413 |
| hippurate | Dorea longicatena                   | 0.0334  | 0.584131 | 0.730815 |
| hippurate | Succinatimonas hippei               | -0.0333 | 0.585445 | 0.730815 |
| hippurate | motu_linkage_group_437              | 0.033   | 0.588397 | 0.732846 |
| hippurate | motu_linkage_group_191              | 0.0328  | 0.590566 | 0.733894 |
| hippurate | Citrobacter koseri                  | -0.0324 | 0.595954 | 0.738776 |
| hippurate | motu_linkage_group_379              | 0.0322  | 0.597206 | 0.738776 |
| hippurate | motu_linkage_group_174              | 0.0321  | 0.598502 | 0.738776 |
| hippurate | Leuconostoc kimchii                 | 0.0319  | 0.601135 | 0.740373 |
| hippurate | motu_linkage_group_13               | 0.0315  | 0.605284 | 0.742186 |
| hippurate | Coprobacillus sp. 29_1              | -0.0315 | 0.605291 | 0.742186 |
| hippurate | Alistipes sp. HGB5                  | -0.0313 | 0.607708 | 0.742307 |
| hippurate | Megasphaera micronuciformis         | -0.0313 | 0.608074 | 0.742307 |
| hippurate | motu_linkage_group_9                | 0.0309  | 0.612333 | 0.745859 |
| hippurate | Streptococcus gallolyticus          | 0.0306  | 0.615515 | 0.746936 |
| hippurate | motu_linkage_group_507              | 0.0306  | 0.615918 | 0.746936 |
| hippurate | Leuconostoc gasicomitatum           | 0.0296  | 0.628031 | 0.759959 |
| hippurate | Propionibacterium freudenreichii    | -0.0293 | 0.631476 | 0.760572 |
| hippurate | motu_linkage_group_274              | -0.0292 | 0.63243  | 0.760572 |
| hippurate | Lactobacillus plantarum             | -0.0291 | 0.633499 | 0.760572 |
| hippurate | motu_linkage_group_7                | 0.029   | 0.634039 | 0.760572 |
| hippurate | Enterobacter cloacae                | 0.0289  | 0.636245 | 0.761417 |
| hippurate | motu_linkage_group_17               | 0.0288  | 0.637497 | 0.761417 |
| hippurate | Desulfovibrio sp. 3_1_syn3          | 0.0281  | 0.644912 | 0.767412 |
| hippurate | motu_linkage_group_302              | 0.0281  | 0.645292 | 0.767412 |

|           |                                        |         |          |          |
|-----------|----------------------------------------|---------|----------|----------|
| hippurate | <i>Streptococcus vestibularis</i>      | 0.0277  | 0.649915 | 0.769893 |
| hippurate | <i>Streptococcus agalactiae</i>        | -0.0277 | 0.650163 | 0.769893 |
| hippurate | <i>Pseudomonas aeruginosa</i>          | 0.027   | 0.658078 | 0.77649  |
| hippurate | <i>Bifidobacterium bifidum</i>         | 0.027   | 0.658542 | 0.77649  |
| hippurate | motu_linkage_group_290                 | 0.0264  | 0.664917 | 0.782339 |
| hippurate | <i>Peptoniphilus lacrimalis</i>        | 0.0258  | 0.673009 | 0.790178 |
| hippurate | motu_linkage_group_32                  | 0.0253  | 0.678568 | 0.794863 |
| hippurate | motu_linkage_group_30                  | -0.0251 | 0.681103 | 0.794863 |
| hippurate | motu_linkage_group_701                 | 0.0251  | 0.681311 | 0.794863 |
| hippurate | <i>Akkermansia muciniphila</i>         | 0.0249  | 0.683768 | 0.79605  |
| hippurate | <i>Klebsiella variicola/pneumoniae</i> | -0.0243 | 0.689943 | 0.801364 |
| hippurate | <i>Prevotella timonensis</i>           | 0.0242  | 0.691481 | 0.801364 |
| hippurate | <i>Eggerthella</i> sp. YY7918          | -0.0241 | 0.69268  | 0.801364 |
| hippurate | <i>Gemella haemolysans</i>             | -0.0237 | 0.697749 | 0.803403 |
| hippurate | <i>Alistipes putredinis</i>            | -0.0236 | 0.698621 | 0.803403 |
| hippurate | <i>Bacteroides caccae</i>              | 0.0236  | 0.698801 | 0.803403 |
| hippurate | motu_linkage_group_575                 | -0.0234 | 0.701721 | 0.804093 |
| hippurate | motu_linkage_group_104                 | -0.0233 | 0.702309 | 0.804093 |
| hippurate | motu_linkage_group_90                  | 0.0228  | 0.708685 | 0.809717 |
| hippurate | <i>Acinetobacter lwoffii</i>           | -0.0226 | 0.711594 | 0.811364 |
| hippurate | <i>Peptostreptococcus stomatis</i>     | 0.0217  | 0.72191  | 0.821433 |
| hippurate | <i>Eubacterium hallii</i>              | -0.0215 | 0.724092 | 0.822224 |
| hippurate | <i>Lactobacillus fermentum</i>         | -0.0208 | 0.733157 | 0.828712 |
| hippurate | <i>Atopobium vaginae</i>               | 0.0204  | 0.73826  | 0.828712 |
| hippurate | <i>Helicobacter pylori</i>             | 0.0204  | 0.73826  | 0.828712 |
| hippurate | <i>Actinomyces viscosus</i>            | -0.0202 | 0.740296 | 0.828712 |
| hippurate | <i>Lactobacillus reuteri</i>           | -0.0202 | 0.740296 | 0.828712 |
| hippurate | <i>Lautropia mirabilis</i>             | -0.0202 | 0.740296 | 0.828712 |
| hippurate | <i>Streptococcus pseudopneumoniae</i>  | -0.0202 | 0.740296 | 0.828712 |
| hippurate | motu_linkage_group_536                 | -0.0198 | 0.745798 | 0.833184 |
| hippurate | motu_linkage_group_316                 | 0.0195  | 0.749652 | 0.835802 |
| hippurate | motu_linkage_group_253                 | 0.0189  | 0.756557 | 0.841803 |
| hippurate | <i>Proteus penneri</i>                 | 0.0186  | 0.760139 | 0.84409  |
| hippurate | motu_linkage_group_279                 | 0.0181  | 0.766877 | 0.849866 |
| hippurate | <i>Eubacterium limosum</i>             | 0.0178  | 0.770718 | 0.850826 |
| hippurate | <i>Lactobacillus sanfranciscensis</i>  | 0.0178  | 0.770821 | 0.850826 |
| hippurate | motu_linkage_group_694                 | 0.0175  | 0.773993 | 0.852626 |
| hippurate | motu_linkage_group_70                  | 0.0173  | 0.776556 | 0.853748 |
| hippurate | motu_linkage_group_568                 | -0.0171 | 0.778993 | 0.854666 |
| hippurate | <i>Megasphaera elsdenii</i>            | -0.0169 | 0.781603 | 0.854666 |
| hippurate | <i>Coprococcus comes</i>               | 0.0169  | 0.782027 | 0.854666 |
| hippurate | <i>Lactococcus lactis</i>              | -0.0164 | 0.787794 | 0.85927  |
| hippurate | <i>Bacteroides stercoris</i>           | 0.0151  | 0.804267 | 0.875511 |
| hippurate | motu_linkage_group_165                 | 0.0149  | 0.807315 | 0.876066 |
| hippurate | <i>Citrobacter</i> sp. 30_2            | -0.0148 | 0.807945 | 0.876066 |
| hippurate | <i>Veillonella parvula</i>             | 0.0147  | 0.81011  | 0.876694 |
| hippurate | <i>Lactobacillus acidophilus</i>       | 0.0132  | 0.829048 | 0.895437 |
| hippurate | motu_linkage_group_37                  | -0.0128 | 0.833476 | 0.898464 |
| hippurate | <i>Veillonella</i> sp. oral taxon 158  | 0.0117  | 0.848521 | 0.910097 |
| hippurate | motu_linkage_group_43                  | 0.0116  | 0.849574 | 0.910097 |
| hippurate | motu_linkage_group_520                 | -0.0115 | 0.850389 | 0.910097 |
| hippurate | motu_linkage_group_140                 | -0.0115 | 0.85085  | 0.910097 |

|           |                              |         |          |          |
|-----------|------------------------------|---------|----------|----------|
| hippurate | motu_linkage_group_633       | 0.0109  | 0.85767  | 0.915621 |
| hippurate | motu_linkage_group_158       | 0.0108  | 0.859475 | 0.91578  |
| hippurate | Actinomyces odontolyticus    | 0.0105  | 0.863208 | 0.916995 |
| hippurate | Pediococcus pentosaceus      | 0.0104  | 0.865301 | 0.916995 |
| hippurate | Bifidobacterium animalis     | -0.0103 | 0.86559  | 0.916995 |
| hippurate | Clostridium perfringens      | 0.0099  | 0.870553 | 0.920489 |
| hippurate | Eubacterium rectale          | 0.0092  | 0.879655 | 0.92778  |
| hippurate | motu_linkage_group_80        | 0.0092  | 0.880804 | 0.92778  |
| hippurate | Haemophilus pittmaniae       | 0.0089  | 0.883454 | 0.928802 |
| hippurate | Eubacterium saphenum         | -0.0086 | 0.888485 | 0.932319 |
| hippurate | motu_linkage_group_6         | -0.008  | 0.895083 | 0.937464 |
| hippurate | Bifidobacterium adolescentis | 0.0079  | 0.897289 | 0.937998 |
| hippurate | motu_linkage_group_550       | -0.0072 | 0.906114 | 0.94394  |
| hippurate | motu_linkage_group_251       | 0.0072  | 0.906387 | 0.94394  |
| hippurate | motu_linkage_group_34        | 0.007   | 0.908811 | 0.944339 |
| hippurate | Porphyromonas uenonis        | -0.0069 | 0.910186 | 0.944339 |
| hippurate | Bacteroides intestinalis     | -0.0063 | 0.918197 | 0.950867 |
| hippurate | Roseburia intestinalis       | 0.0061  | 0.920238 | 0.951199 |
| hippurate | Sutterella wadsworthensis    | 0.005   | 0.935147 | 0.964267 |
| hippurate | motu_linkage_group_497       | 0.0049  | 0.936368 | 0.964267 |
| hippurate | Streptococcus cristatus      | -0.0046 | 0.940125 | 0.965123 |
| hippurate | motu_linkage_group_310       | 0.0042  | 0.944512 | 0.965123 |
| hippurate | motu_linkage_group_727       | 0.0042  | 0.945724 | 0.965123 |
| hippurate | motu_linkage_group_134       | -0.0039 | 0.949431 | 0.965123 |
| hippurate | Parabacteroides merdae       | 0.0038  | 0.950574 | 0.965123 |
| hippurate | motu_linkage_group_498       | 0.0038  | 0.950637 | 0.965123 |
| hippurate | motu_linkage_group_365       | 0.0038  | 0.950854 | 0.965123 |
| hippurate | Bacteroides fluxus           | -0.0037 | 0.951161 | 0.965123 |
| hippurate | motu_linkage_group_268       | -0.0036 | 0.953356 | 0.965579 |
| hippurate | Peptoniphilus duerdenii      | -0.0032 | 0.95876  | 0.968028 |
| hippurate | motu_linkage_group_233       | -0.0031 | 0.959275 | 0.968028 |
| hippurate | Bacteroides salanitronis     | 0.0028  | 0.963306 | 0.970325 |
| hippurate | motu_linkage_group_452       | -0.002  | 0.973525 | 0.978835 |
| hippurate | Clostridium sp. D5           | -0.0012 | 0.984563 | 0.988137 |
| hippurate | Leuconostoc lactis           | -0.0008 | 0.989829 | 0.991622 |
| hippurate | motu_linkage_group_126       | -0.0006 | 0.992307 | 0.992307 |
