# Supplementary material for: Human and preclinical studies of the host–gut microbiome co-metabolite hippurate as a marker and mediator of metabolic health
Source: PubMed Central journal article supplement (PMC8515120; doi:10.1136/gutjnl-2020-323314), 2021-05-11
Supplement: gutjnl-2020-323314supp017.pdf [file gutjnl-2020-323314supp017.pdf]

**Supplementary Table ST.8. Urinary hippurate concentration distribution over enterotypes (N=271).** The statistical difference over the four enterotypes was tested using a non-parametric Kruskal-Wallis test, followed by post hoc Dunn tests for pairwise differences (two-sided testing).

| X           | Y         | Kruskal-Wallis |    | Kruskal-Wallis P | Level | Level2 | Score Mean Std Err |       |       | Effect   |          | N   |
|-------------|-----------|----------------|----|------------------|-------|--------|--------------------|-------|-------|----------|----------|-----|
|             |           | ChiSquare      | DF |                  |       |        | Difference         | Dif   | Z     | size (r) | p-value  |     |
| Enterotypes | Hippurate | 41.7878        | 3  | 4.45E-09         | Rum   | Bact2  | 92.14              | 16.69 | 5.52  | 0.45524  | 2.04E-07 | 147 |
| Enterotypes | Hippurate | 41.7878        | 3  | 4.45E-09         | Prev  | Bact2  | 83.38              | 18.36 | 4.54  | 0.4984   | 3.36E-05 | 83  |
| Enterotypes | Hippurate | 41.7878        | 3  | 4.45E-09         | Rum   | Bact1  | 50.86              | 11.9  | 4.28  | 0.31183  | 0.00011  | 188 |
| Enterotypes | Hippurate | 41.7878        | 3  | 4.45E-09         | Prev  | Bact1  | 42.1               | 14.14 | 2.98  | 0.26733  | 0.01747  | 124 |
| Enterotypes | Hippurate | 41.7878        | 3  | 4.45E-09         | Rum   | Prev   | 8.75               | 12.68 | 0.69  | 0.05197  | 1        | 176 |
| Enterotypes | Hippurate | 41.7878        | 3  | 4.45E-09         | Bact2 | Bact1  | -41.26             | 17.83 | -2.31 | -0.23747 | 0.12383  | 95  |
