# Supplementary material for: Human and preclinical studies of the host–gut microbiome co-metabolite hippurate as a marker and mediator of metabolic health
Source: PubMed Central journal article supplement (PMC8515120; doi:10.1136/gutjnl-2020-323314), 2021-05-11
Supplement: gutjnl-2020-323314supp020.pdf [file gutjnl-2020-323314supp020.pdf]

**Supplementary Table ST.10. Mann-Whitney U test for dietary (PC1) stratification in each bioclinical or main food variable between high or low PC1 groups using Benjamini-Hochberg FDR correction.**

| Short name               | Median  |          | pFDR                   |
|--------------------------|---------|----------|------------------------|
|                          | Low PC1 | High PC1 |                        |
| 'Ageatvisit'             | 55.57   | 56.59    | 0.9551                 |
| 'gender'                 | 59.52   | 40.30    |                        |
| 'gender'                 | 40.48   | 59.70    |                        |
| BMI'                     | 31.33   | 31.18    | 0.9551                 |
| 'weight'                 | 91.00   | 96.40    | 0.7023                 |
| 'waist'                  | 105.00  | 106.00   | 0.7087                 |
| 'hip'                    | 112.00  | 111.00   | 0.7087                 |
| 'WBTOT_PFAT'             | 34.05   | 31.90    | 0.5361                 |
| 'pgluc'                  | 5.75    | 5.70     | 0.9551                 |
| 'insu'                   | 45.00   | 53.00    | 0.6169                 |
| 'cpep'                   | 723.00  | 797.00   | 0.6169                 |
| 'Homair'                 | 1.70    | 2.00     | 0.6169                 |
| 'pchol'                  | 5.40    | 5.70     | 0.9551                 |
| 'hdl'                    | 1.44    | 1.34     | 0.5361                 |
| 'tri'                    | 1.15    | 1.27     | 0.5361                 |
| 'FFA'                    | 0.49    | 0.45     | 0.9551                 |
| 'wbc'                    | 5.90    | 5.80     | 0.9551                 |
| 'lymph'                  | 1.80    | 1.80     | 0.9350                 |
| 'CRP'                    | 1.60    | 1.90     | 0.7087                 |
| 'IL6'                    | 15.92   | 17.00    | 0.9558                 |
| 'TNFalfa'                | 16.76   | 6.32     | 0.6318                 |
| 'FIAF'                   | 83.28   | 80.85    | 0.9730                 |
| 'leptin'                 | 10.94   | 10.02    | 0.6169                 |
| 'Adiponectin'            | 8.60    | 7.55     | 0.6169                 |
| 'ALAT'                   | 18.00   | 22.00    | 0.6318                 |
| 'energy'                 | 7338.31 | 11293.40 | 1.11x10 <sup>-24</sup> |
| 'protein_total'          | 64.55   | 101.27   | 2.71x10 <sup>-26</sup> |
| 'fat_total'              | 60.80   | 100.50   | 1.23x10 <sup>-21</sup> |
| 'sat_fa'                 | 21.48   | 35.25    | 1.22x10 <sup>-18</sup> |
| 'carbo_total'            | 220.27  | 329.91   | 7.62x10 <sup>-21</sup> |
| 'alcohol'                | 7.10    | 9.96     | 0.6400                 |
| 'fibre_total'            | 19.12   | 28.90    | 1.9x10 <sup>-13</sup>  |
| 'Milk'                   | 159.20  | 314.30   | 9.44x10 <sup>-9</sup>  |
| 'Cheese'                 | 15.99   | 32.14    | 1.35x10 <sup>-5</sup>  |
| 'Ice-cream'              | 4.91    | 4.81     | 0.7950                 |
| 'Cereal and starch food' | 173.55  | 260.25   | 3.46x10 <sup>-12</sup> |
| 'Vegetables'             | 111.11  | 128.95   | 0.0231                 |
| 'Potatoes'               | 101.14  | 137.76   | 0.0065                 |
| 'Fruits'                 | 236.04  | 342.50   | 0.0080                 |
| 'Meat'                   | 83.69   | 124.80   | 6.05x10 <sup>-8</sup>  |
| 'Fish'                   | 26.77   | 38.46    | 0.0018                 |
| 'Poultry'                | 18.76   | 24.32    | 0.0080                 |

|                        |        |        |                        |
|------------------------|--------|--------|------------------------|
| 'Egg'                  | 16.84  | 26.44  | 0.0008                 |
| 'Spices'               | 3.87   | 5.65   | $1.62 \times 10^{-8}$  |
| carbohydrate rich food | 681.08 | 908.61 | $9.44 \times 10^{-9}$  |
| 'Protein.rich.food'    | 278.95 | 537.83 | $6.58 \times 10^{-14}$ |
| combined.poultry.and.  | 46.80  | 67.35  | $1.00 \times 10^{-5}$  |
