# Supplementary material for: Human and preclinical studies of the host–gut microbiome co-metabolite hippurate as a marker and mediator of metabolic health
Source: HighWire-hosted journal article supplement (doi:10.1136/gutjnl-2020-323314), 2021-05-11
Supplement: gutjnl-2020-323314supp023_data_supplement.pdf [file gutjnl-2020-323314supp023_data_supplement.pdf]

**Supplementary Table 12. Modelling hippurate urinary concentrations in function of microbiome richness and phenylpropanoid metabolism modules, enterotype, individuals' age, gender and BMI and dietary habits.** Dietary habits were encoded either as food categories (N=184), or summarized in two principal components (dietary PC; N=193). The contribution of each explanatory variable in an univariate modelling of urinary hippurate is first provided (with the prefix univariate). The best model (stepwise forward selection) summary statistics are reported next with the prefix multivariate. All continuous variables were rank-transformed.

| Biodi-<br>nical<br>variables and<br>units           | Short name          | High PC1         |                   | pFDR             | Low PC1           |                  | pFDR              | High PC2         |                   | pFDR             | Low PC2           |        | pFDR   |
|-----------------------------------------------------|---------------------|------------------|-------------------|------------------|-------------------|------------------|-------------------|------------------|-------------------|------------------|-------------------|--------|--------|
|                                                     |                     | Median           |                   |                  | Median            |                  |                   | Median           |                   |                  | Median            |        |        |
|                                                     |                     | Low<br>Hippurate | High<br>Hippurate |        |        |
| Elimination and sex                                 | 'Ageatvisit'        | 55.6             | 60.6              | 0.0581           | 55.8              | 55.3             | 0.9798            | 56.0             | 59.2              | 0.5988           | 55.5              | 56.3   | 0.9435 |
| female (%)                                          | 'gender'            | 44.2             | 26.7              |                  | 56.4              | 72.0             |                   | 68.7             | 69.6              |                  | 40.5              | 33.3   |        |
| male (%)                                            | 'gender'            | 55.8             | 73.3              |                  | 43.6              | 28.0             |                   | 31.3             | 30.4              |                  | 59.5              | 66.7   |        |
| Body mass index, kg                                 | 'BMI'               | 32.0             | 25.2              | 0.0081           | 31.6              | 30.6             | 0.6384            | 31.1             | 25.7              | 0.3632           | 32.0              | 31.3   | 0.8798 |
| weight in kg                                        | 'weight'            | 98.8             | 78.0              | 0.0199           | 91.5              | 83.7             | 0.6384            | 90.0             | 78.0              | 0.3632           | 97.3              | 97.1   | 0.9750 |
| Waist circumference (cm)                            | 'waist'             | 108.0            | 94.5              | 0.0747           | 106.0             | 103.0            | 0.6384            | 103.0            | 93.0              | 0.4276           | 108.0             | 110.5  | 0.9750 |
| hip circumference (cm)                              | 'hip'               | 112.0            | 106.0             | 0.0426           | 112.0             | 111.0            | 0.6996            | 112.0            | 106.0             | 0.3971           | 112.0             | 111.0  | 0.8798 |
| Waist percentage (fract)                            | 'WBTOT_P FAT'       | 32.4             | 26.0              | 0.0576           | 34.0              | 34.9             | 0.9798            | 36.3             | 33.8              | 0.3971           | 32.5              | 31.2   | 0.9435 |
| fasting plasma-Glucose (mmol/L)                     | 'p gluc'            | 5.7              | 5.6               | 0.5353           | 5.7               | 5.9              | 0.8156            | 5.6              | 5.6               | 0.9567           | 5.8               | 6.0    | 0.8798 |
| fasting serum-Insulin (pmol/L)                      | 'insu'              | 59.5             | 29.0              | 0.0199           | 49.0              | 37.0             | 0.4531            | 44.0             | 26.0              | 0.0317           | 63.0              | 53.0   | 0.8798 |
| fasting C-peptide (pmol/L)                          | 'c pep'             | 939.5            | 597.0             | 0.0192           | 796.0             | 603.0            | 0.6384            | 744.0            | 550.0             | 0.0829           | 900.0             | 804.0  | 0.9435 |
| fasting assessment of insulin resistance (HOMA-IR)  | 'Homair'            | 2.3              | 1.1               | 0.0199           | 1.9               | 1.3              | 0.4531            | 1.6              | 0.9               | 0.0347           | 2.3               | 2.0    | 0.8798 |
| fasting total cholesterol (mmol/L)                  | 'p chol'            | 5.7              | 5.8               | 0.5370           | 5.4               | 5.5              | 0.8286            | 5.5              | 5.6               | 0.6890           | 5.6               | 5.5    | 0.9750 |
| HDL-Cholesterol (mmol/L)                            | 'hdl'               | 1.3              | 1.4               | 0.3621           | 1.4               | 1.5              | 0.9342            | 1.4              | 1.6               | 0.3971           | 1.4               | 1.4    | 0.9750 |
| fasting total triglyceride (mmol/L)                 | 'tri'               | 1.4              | 1.1               | 0.0426           | 1.1               | 1.2              | 0.9798            | 1.1              | 1.0               | 0.3971           | 1.3               | 1.3    | 0.9750 |
| fasting free fatty acids (mmol/L)                   | 'FFA'               | 0.5              | 0.4               | 0.1673           | 0.5               | 0.5              | 0.9342            | 0.5              | 0.5               | 0.8100           | 0.5               | 0.4    | 0.9750 |
| white blood cells count (10 <sup>9</sup> /L)        | 'wbc'               | 6.0              | 5.6               | 0.2862           | 5.9               | 5.7              | 1.0000            | 5.8              | 5.2               | 0.3971           | 6.0               | 6.3    | 0.9435 |
| lymphocytes count (10 <sup>9</sup> /L)              | 'lymph'             | 1.9              | 1.7               | 0.4743           | 1.9               | 1.8              | 0.9798            | 1.8              | 1.7               | 0.5877           | 1.9               | 2.0    | 0.8798 |
| fasting C-reactive protein (mg/L)                   | 'CRP'               | 2.2              | 1.0               | 0.0573           | 1.5               | 2.1              | 0.8156            | 1.6              | 1.3               | 0.6072           | 1.8               | 2.2    | 0.9750 |
| fasting interleukin 6 (pg/mL)                       | 'IL6'               | 17.2             | 10.5              | 0.1673           | 16.4              | 11.8             | 0.6542            | 12.6             | 17.0              | 0.8870           | 20.2              | 11.6   | 0.8798 |
| fasting tumor necrosis factor alpha (pg/mL)         | 'TNFalfa'           | 12.7             | 2.0               | 0.3212           | 23.9              | 0.6              | 0.2134            | 16.8             | 0.0               | 0.0931           | 28.3              | 3.0    | 0.8798 |
| fasting abdominal adipose tissue (cm <sup>2</sup> ) | 'FAF'               | 83.3             | 63.7              | 0.0574           | 81.2              | 90.3             | 0.5284            | 83.5             | 83.8              | 0.9889           | 82.9              | 75.3   | 0.9750 |
| fasting leptin (microgram)                          | 'leptin'            | 11.3             | 5.6               | 0.0426           | 11.3              | 10.9             | 0.9798            | 13.0             | 9.0               | 0.3971           | 11.3              | 9.2    | 0.8798 |
| fasting adiponectin (mg/dL)                         | 'Adiponectin'       | 7.3              | 9.7               | 0.2048           | 8.3               | 11.6             | 0.4531            | 9.6              | 11.6              | 0.3971           | 7.2               | 8.0    | 0.9138 |
| fasting alanine aminotransferase (U/L)              | 'ALAT'              | 22.0             | 14.0              | 0.4746           | 19.5              | 15.0             | 0.2134            | 21.0             | 14.0              | 0.0235           | 21.0              | 22.5   | 0.9750 |
| Energy (KJ)                                         | 'energy'            | 11386.1          | 11293.4           | 0.9580           | 7347.2            | 7329.4           | 0.8857            | 8787.5           | 8060.2            | 0.5182           | 8169.3            | 9300.8 | 0.4391 |
| Protein, total (g)                                  | 'protein_total'     | 97.8             | 103.5             | 0.9580           | 64.1              | 65.4             | 0.7773            | 78.9             | 67.7              | 0.5182           | 68.4              | 81.2   | 0.4391 |
| Fat, total (g)                                      | 'fat_total'         | 100.7            | 99.7              | 0.9580           | 61.5              | 57.5             | 0.8857            | 69.3             | 57.8              | 0.5964           | 75.4              | 88.2   | 0.4391 |
| Saturated fat (g)                                   | 'sat_fa'            | 34.7             | 36.5              | 0.9580           | 22.3              | 18.7             | 0.3461            | 22.9             | 18.7              | 0.5182           | 27.8              | 33.3   | 0.4391 |
| Carbohydrate, total (g)                             | 'carbo_total'       | 332.6            | 328.6             | 0.9580           | 218.6             | 234.2            | 0.7773            | 278.0            | 277.7             | 0.5964           | 222.8             | 262.3  | 0.4887 |
| alcohol (g)                                         | 'alcohol'           | 9.8              | 16.5              | 0.6733           | 8.3               | 4.6              | 0.4755            | 7.2              | 8.0               | 0.5964           | 9.7               | 3.8    | 0.4391 |
| fibres, total (g)                                   | 'fibre_total'       | 29.3             | 27.5              | 0.9580           | 18.9              | 21.8             | 0.3570            | 26.8             | 27.1              | 0.8171           | 17.6              | 20.4   | 0.4391 |
| Milk (g/day)                                        | 'Milk'              | 314.5            | 308.0             | 0.9580           | 149.3             | 170.6            | 0.8857            | 198.4            | 190.0             | 0.7881           | 174.8             | 206.5  | 0.9471 |
| Cheese (g/day)                                      | 'Cheese'            | 24.1             | 48.3              | 0.9580           | 17.3              | 12.5             | 0.4014            | 19.7             | 11.9              | 0.5182           | 20.4              | 29.3   | 0.4391 |
| Ice cream (g/day)                                   | 'Ice-cream'         | 4.8              | 4.8               | 0.9580           | 5.1               | 4.8              | 0.4755            | 5.5              | 4.8               | 0.5182           | 4.8               | 4.8    | 0.9471 |
| Real and starch food (g/day)                        | 'Real and starch f' | 241.9            | 310.5             | 0.4482           | 174.2             | 164.2            | 0.8857            | 188.8            | 178.0             | 0.8171           | 189.0             | 215.5  | 0.4391 |
| Vegetables (g/day)                                  | 'Vegetables'        | 133.6            | 118.8             | 0.9580           | 107.3             | 132.0            | 0.3461            | 156.8            | 161.8             | 0.8171           | 95.6              | 98.9   | 0.9471 |
| Potatoes (g/day)                                    | 'Potatoes'          | 127.7            | 192.2             | 0.4482           | 111.5             | 68.4             | 0.3461            | 95.2             | 77.1              | 0.6819           | 126.7             | 132.7  | 0.9471 |
| Fruits (g/day)                                      | 'Fruits'            | 360.1            | 329.9             | 0.8937           | 184.9             | 351.5            | 0.3461            | 483.6            | 436.5             | 0.5182           | 125.5             | 128.9  | 0.9471 |

|                                       |                  |       |       |        |       |       |        |       |       |        |       |       |        |
|---------------------------------------|------------------|-------|-------|--------|-------|-------|--------|-------|-------|--------|-------|-------|--------|
| Meat (g/day)                          | 'Meat'           | 123.5 | 147.0 | 0.9580 | 85.3  | 74.7  | 0.6998 | 83.7  | 74.6  | 0.5182 | 107.1 | 127.5 | 0.4391 |
| Fish (g/day)                          | 'Fish'           | 33.0  | 63.0  | 0.1031 | 26.4  | 27.2  | 0.8857 | 31.4  | 45.2  | 0.5182 | 27.1  | 28.2  | 0.9471 |
| Poultry (g/day)                       | 'Poultry'        | 25.0  | 22.6  | 0.9580 | 17.6  | 25.6  | 0.3570 | 23.9  | 27.6  | 0.7087 | 18.0  | 17.7  | 0.9471 |
| Egg (g/day)                           | 'Egg'            | 26.7  | 23.7  | 0.9580 | 17.7  | 15.1  | 0.7773 | 19.8  | 15.3  | 0.5182 | 19.6  | 19.6  | 0.9471 |
| Spices (g/day)                        | 'Spices'         | 5.6   | 5.8   | 0.9580 | 3.9   | 4.0   | 0.7773 | 3.9   | 4.4   | 0.7881 | 4.7   | 4.7   | 0.9471 |
| Hydrate rich food                     | bohydrate rich f | 913.7 | 908.6 | 0.9580 | 674.5 | 758.0 | 0.4755 | 951.7 | 908.6 | 0.6949 | 587.7 | 629.9 | 0.9471 |
| Protein rich food (g/Protein.rich.foo |                  | 547.0 | 535.2 | 0.9580 | 279.5 | 278.4 | 0.8825 | 335.0 | 295.2 | 0.5182 | 357.8 | 388.7 | 0.9471 |
| Food poultry and fish                 | ined.poultry.an  | 61.0  | 85.0  | 0.5475 | 46.4  | 56.2  | 0.4485 | 57.6  | 71.4  | 0.5182 | 45.4  | 53.8  | 0.9471 |
