# Supplementary figures and images for: Human and preclinical studies of the host–gut microbiome co-metabolite hippurate as a marker and mediator of metabolic health
Source: HighWire-hosted journal article supplement (doi:10.1136/gutjnl-2020-323314), 2021-05-11

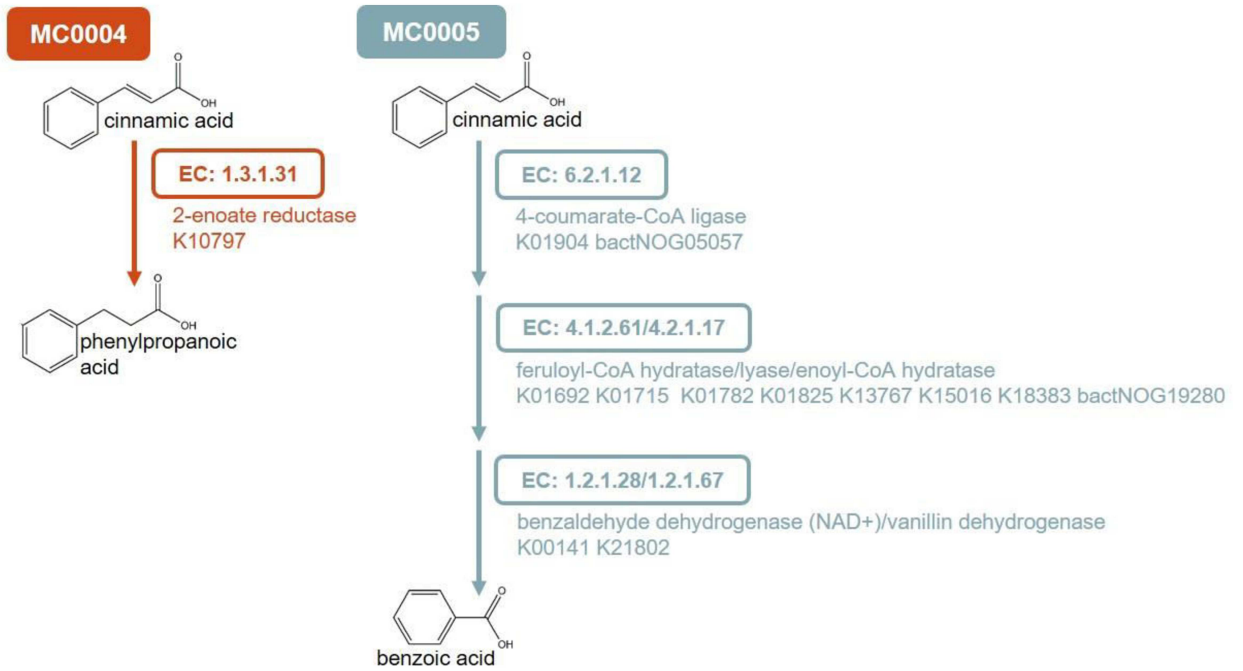

Supplemental Figure 7

Supplement: gutjnl-2020-323314supp012_data_supplement.pdf [file gutjnl-2020-323314supp012_data_supplement.pdf]

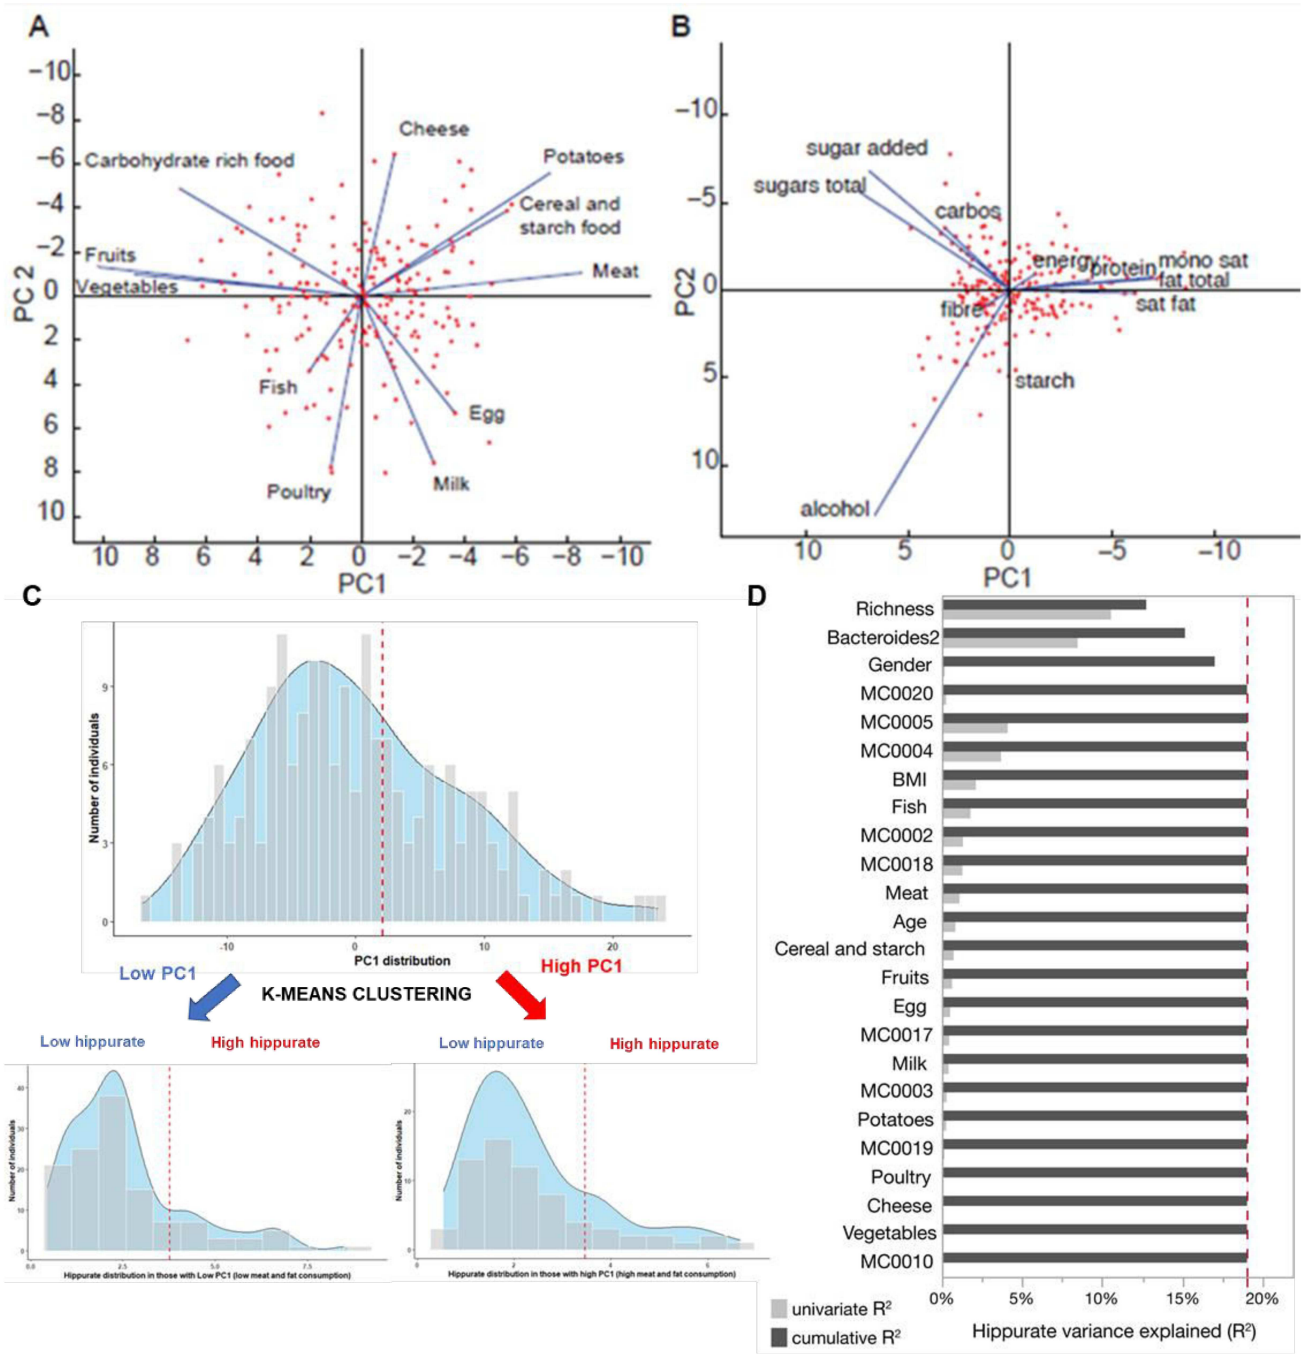

Supplemental Figure 8

Supplement: gutjnl-2020-323314supp019_data_supplement.pdf [file gutjnl-2020-323314supp019_data_supplement.pdf]

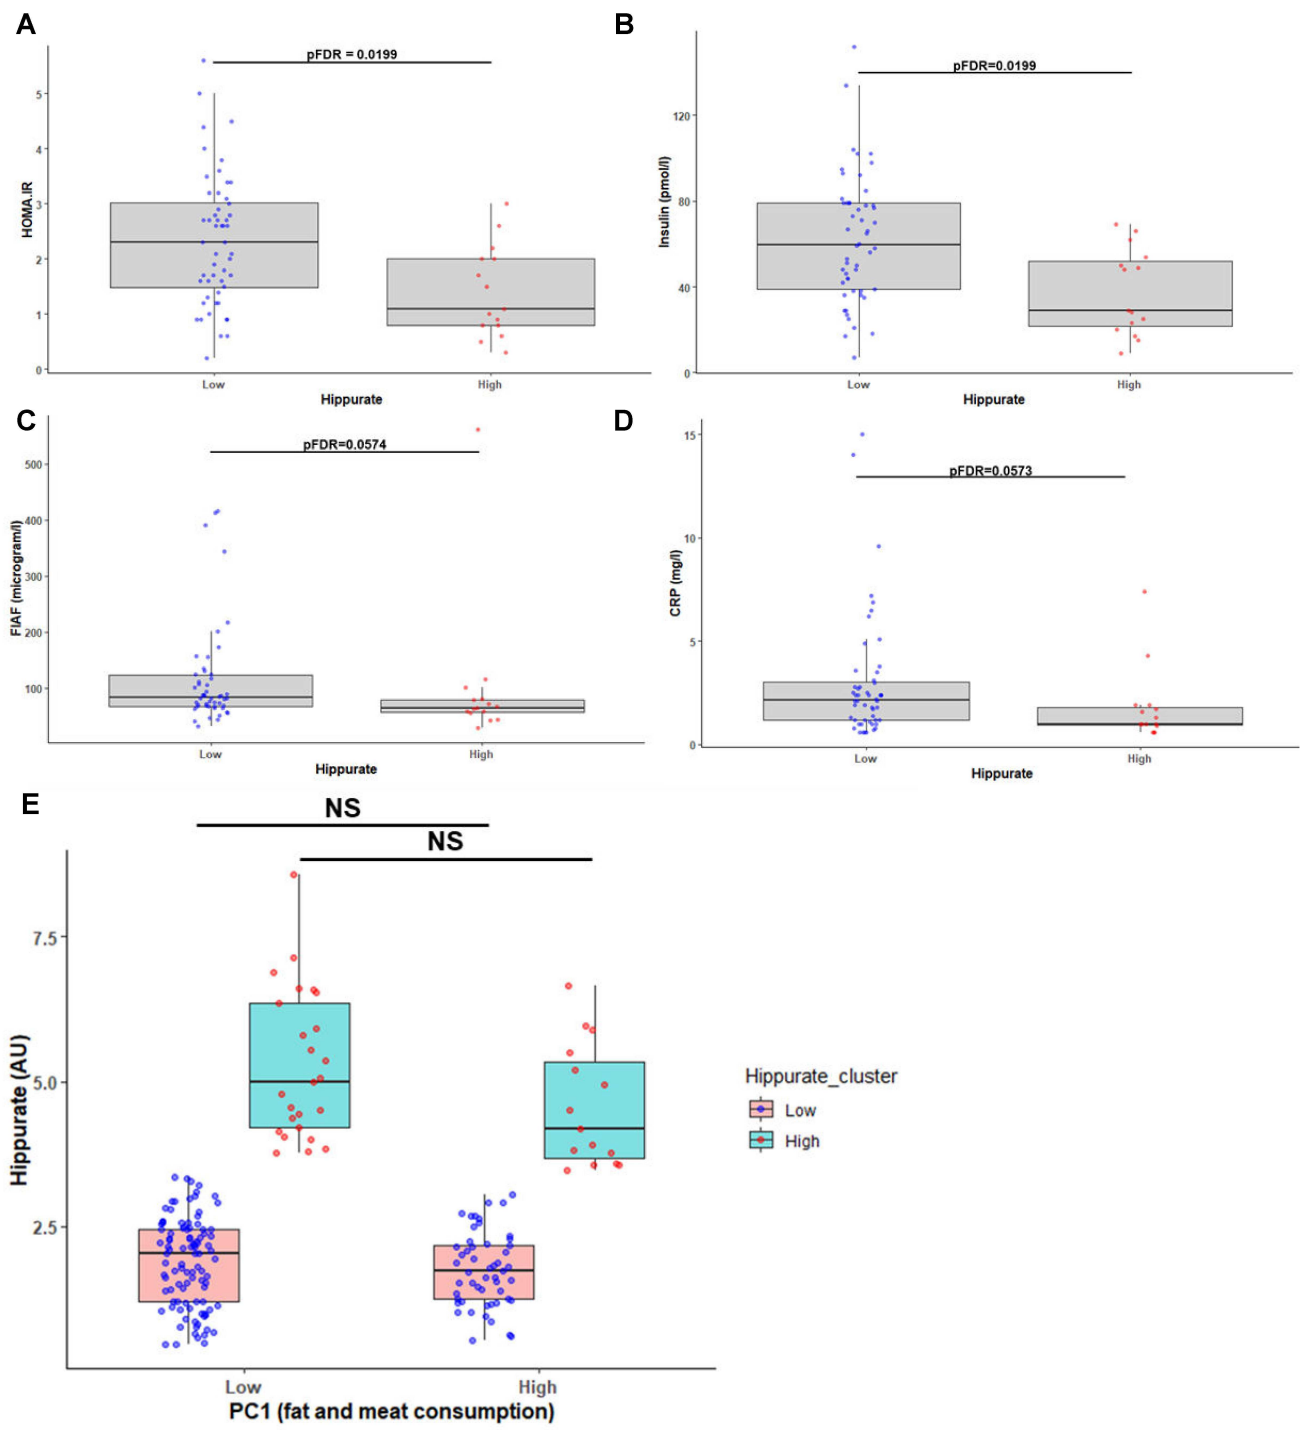

Supplemental Figure 9

Supplement: gutjnl-2020-323314supp022_data_supplement.pdf [file gutjnl-2020-323314supp022_data_supplement.pdf]

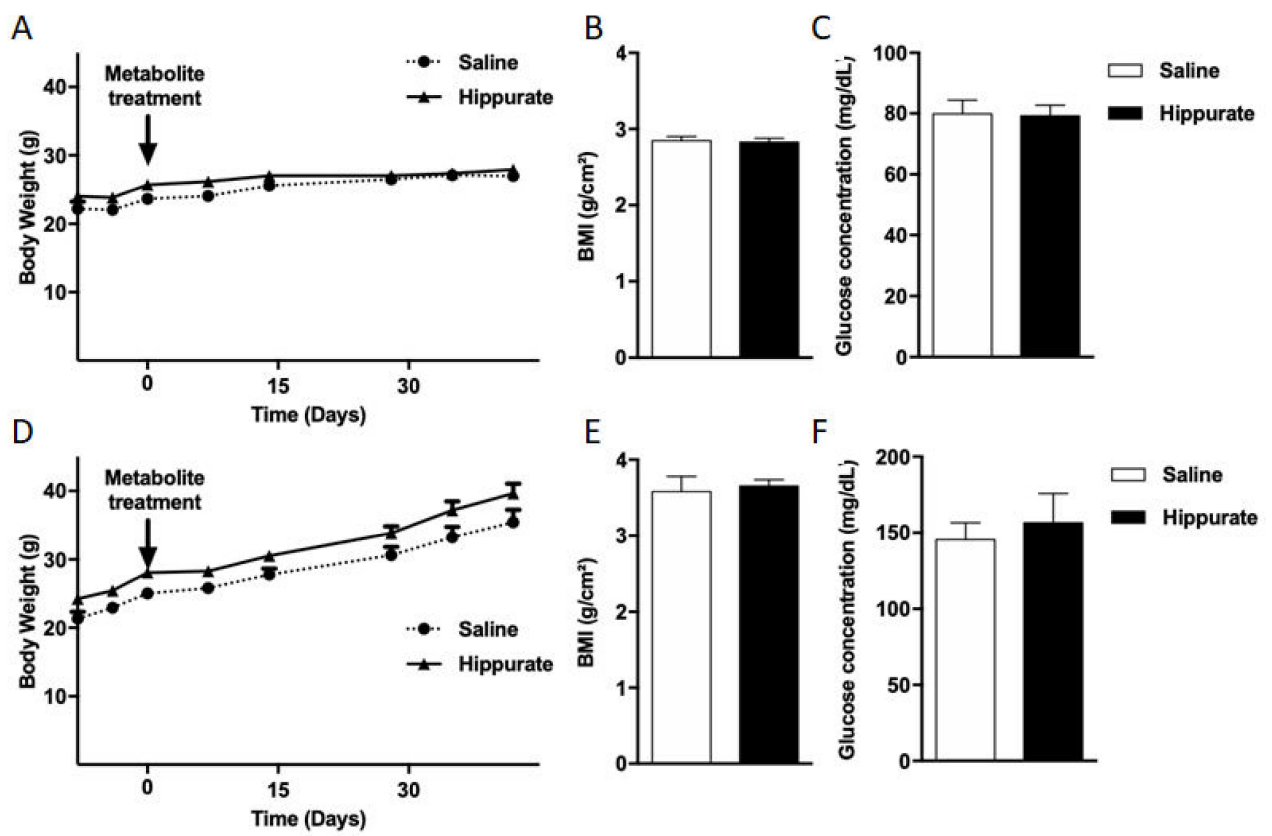

Supplemental Figure 10

Supplement: gutjnl-2020-323314supp024_data_supplement.pdf [file gutjnl-2020-323314supp024_data_supplement.pdf]

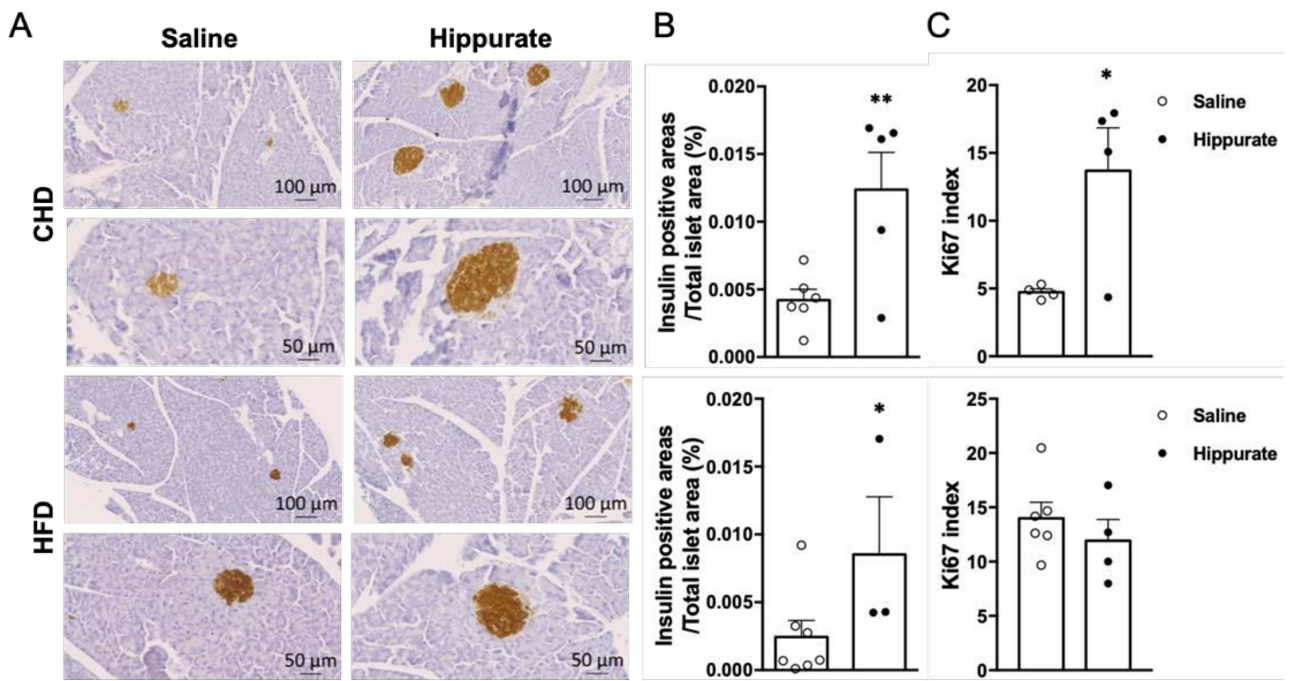

Supplemental Figure 11

Supplement: gutjnl-2020-323314supp025_data_supplement.pdf [file gutjnl-2020-323314supp025_data_supplement.pdf]

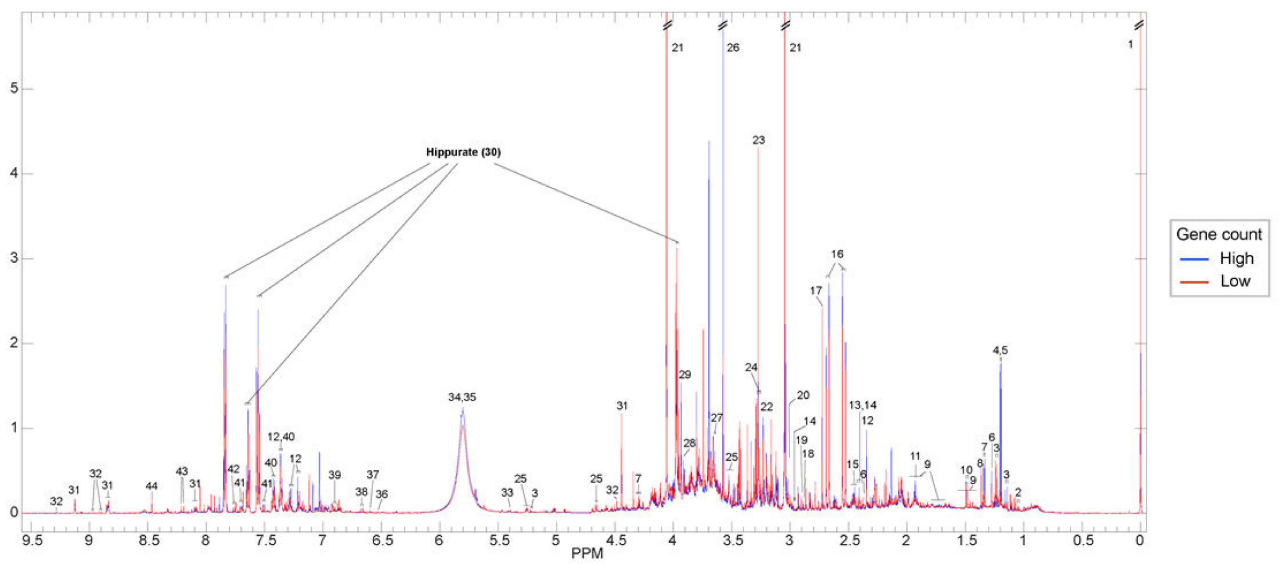

Supplemental Figure 3

Supplement: gutjnl-2020-323314supp006_data_supplement.pdf [file gutjnl-2020-323314supp006_data_supplement.pdf]

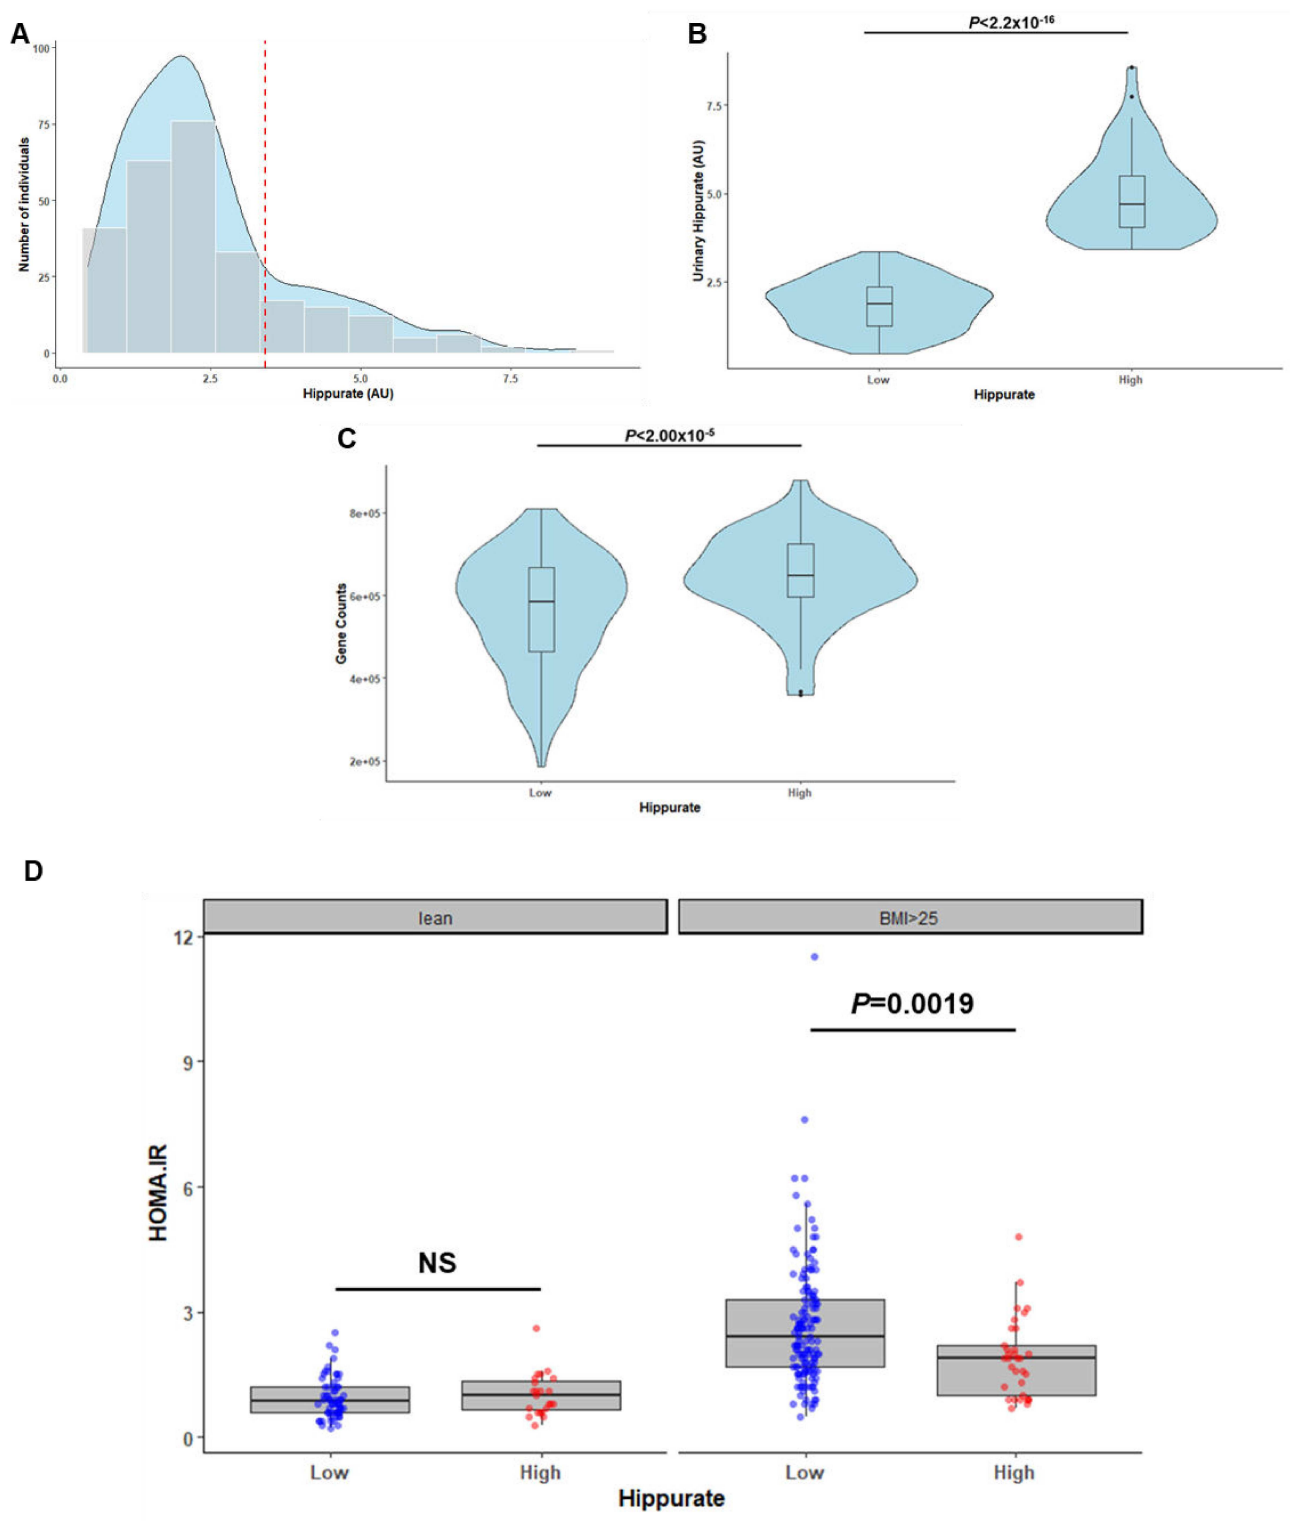

Supplemental Figure 4

Supplement: gutjnl-2020-323314supp008_data_supplement.pdf [file gutjnl-2020-323314supp008_data_supplement.pdf]

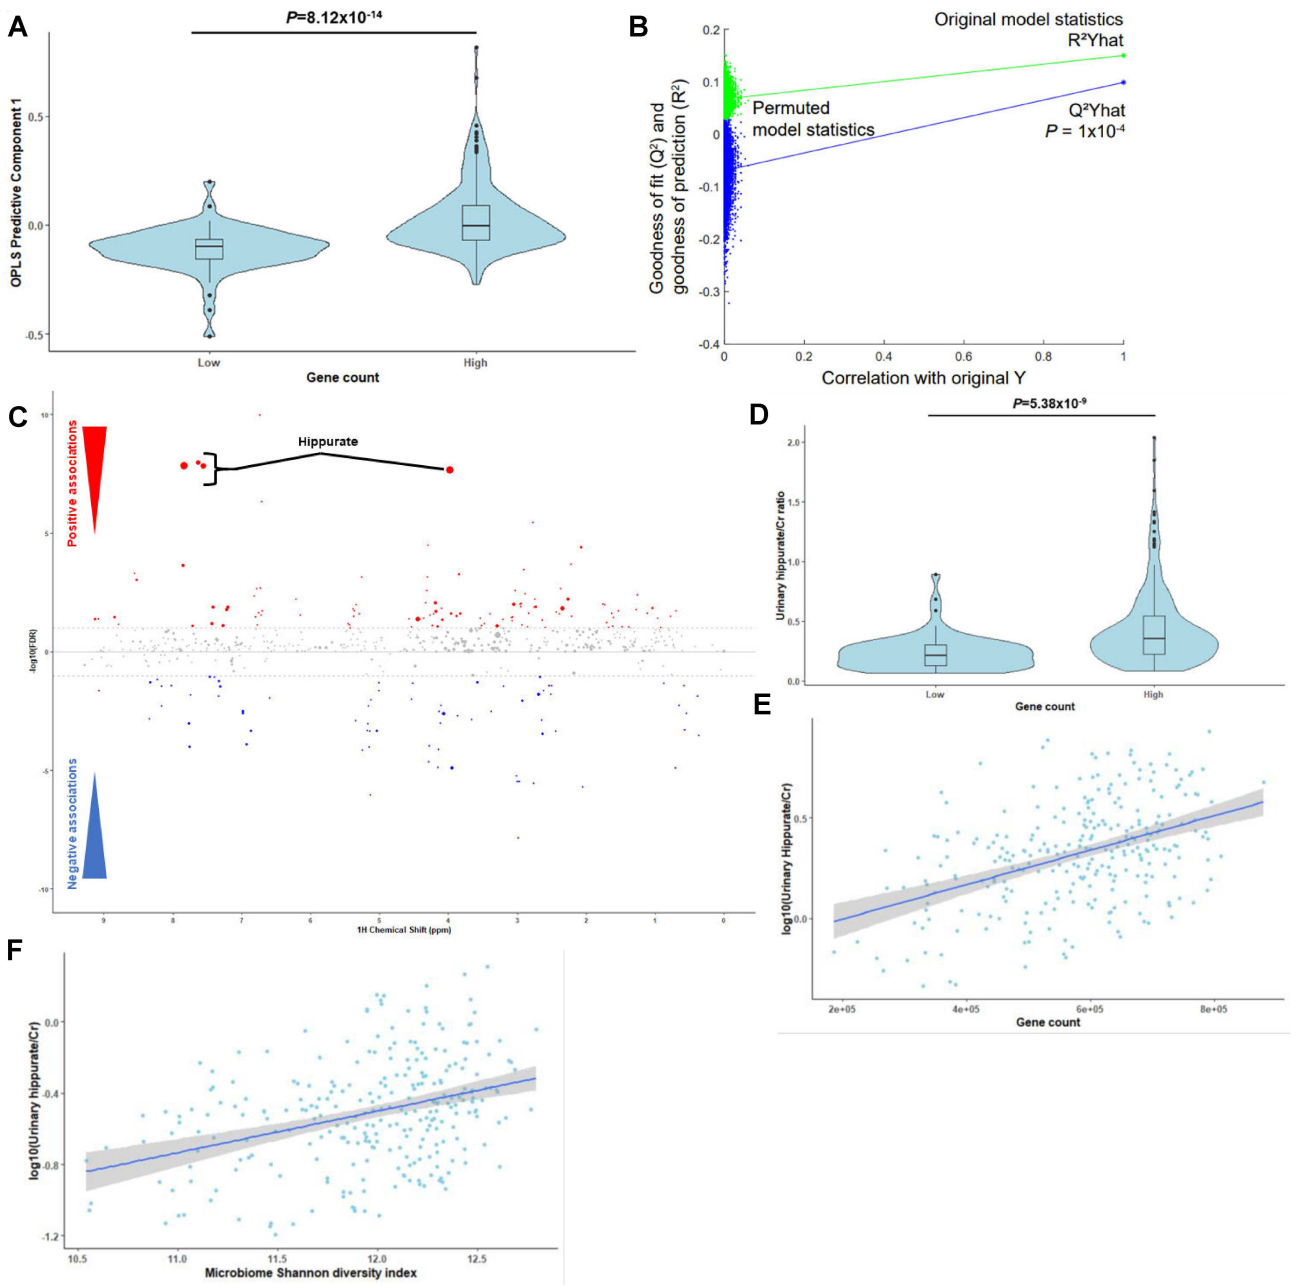

Supplemental Figure 6

Supplement: gutjnl-2020-323314supp010_data_supplement.pdf [file gutjnl-2020-323314supp010_data_supplement.pdf]
